# Reconstructing the 3D genome organization of Neanderthals reveals that chromatin folding shaped phenotypic and sequence divergence

Evonne McArthur<sup>1,2</sup>, David C. Rinker<sup>3</sup>, Erin N. Gilbertson<sup>2,4</sup>, Geoff Fudenberg<sup>5</sup>,  
Maureen Pittman<sup>4,6</sup>, Kathleen Keough<sup>6,7</sup>, Katherine S. Pollard<sup>2,4,6,7,8</sup>, and  
John A. Capra<sup>1,2,4,8,9,\*</sup>

<sup>1</sup>Vanderbilt Genetics Institute, Vanderbilt University Medical Center, Nashville, TN

<sup>2</sup>Bakar Computational Health Sciences Institute, University of California, San Francisco, CA

<sup>3</sup>Department of Chemistry, Vanderbilt University, Nashville, TN

<sup>4</sup>Biomedical Informatics Graduate Program, University of California San Francisco, San Francisco, CA

<sup>5</sup>Department of Computational and Quantitative Biology, University of Southern California, Los Angeles, CA

<sup>6</sup>Gladstone Institute of Data Science and Biotechnology, San Francisco, CA

<sup>7</sup>Chan Zuckerberg Biohub, San Francisco, CA, USA

<sup>8</sup>Department of Epidemiology and Biostatistics, University of California, San Francisco, CA

<sup>9</sup>Department of Biological Sciences, Vanderbilt University, Nashville, TN

\*Correspondence to [tony@capralab.org](mailto:tony@capralab.org)

## Abstract

Changes in gene regulation were a major driver of the divergence of archaic hominins (AHs)—Neanderthals and Denisovans—and modern humans (MHs). The three-dimensional (3D) folding of the genome is critical for regulating gene expression; however, its role in recent human evolution has not been explored because the degradation of ancient samples does not permit experimental determination of AH 3D genome folding. To fill this gap, we apply novel deep learning methods for inferring 3D genome organization from DNA sequence to Neanderthal, Denisovan, and diverse MH genomes. Using the resulting 3D contact maps across the genome, we identify 167 distinct regions with diverged 3D genome organization between AHs and MHs. We show that these 3D-diverged loci are enriched for genes related to the function and morphology of the eye, supra-orbital ridges, hair, lungs, immune response, and cognition. Despite these specific diverged loci, the 3D genome of AHs and MHs is more similar than expected based on sequence divergence, suggesting that the pressure to maintain 3D genome organization constrained hominin sequence evolution. We also find that 3D genome organization constrained the landscape of AH ancestry in MHs today: regions more tolerant of 3D variation are enriched for introgression in modern Eurasians. Finally, we identify loci where modern Eurasians have inherited novel 3D genome folding from AH ancestors, which provides a putative molecular mechanism for phenotypes associated with these introgressed haplotypes. In summary, our application of deep learning to predict archaic 3D genome organization illustrates the potential of inferring molecular phenotypes from ancient DNA to reveal previously unobservable biological differences.

## 1 Highlights

- The 3D genome organization of archaic hominins can be inferred from sequence to facilitate comparisons to modern humans.
- Loci with 3D genome folding divergence between humans and Neanderthals highlight functional differences in the eye, supra-orbital ridges, hair, lungs, immune response, and cognition.
- 3D genome organization constrained recent human evolution.
- Tolerance to variation in 3D genome organization shaped the landscape of Neanderthal ancestry in modern humans.
- Neanderthal introgression contributed novel 3D genome folding patterns to Eurasians.

## 2 Introduction

The sequencing of archaic hominin (AH) and modern human (MH) genomes has transformed our understanding of human history, evolution, and biology [1–5]. However, even with these whole-genome sequences available, our understanding of how and why AHs differed from MHs is limited [6]. A major challenge in understanding the phenotypic and sequence differences between AHs and MHs is bridging the gap between genetic variation and function. The evolution of hominins is largely driven by changes in the regulation of conserved proteins [7–13], but the mechanisms through which archaic variants influence gene expression, and ultimately phenotype, are incompletely understood [6, 13, 14].

Many studies that investigate the gene regulatory differences between MHs and AHs leverage Neanderthal ancestry remaining in modern Eurasians. Because MHs interbred with many AH groups over the past 50,000 years, more than one-third of the Neanderthal genome remains in introgressed sequences in MH genomes [15, 16]. These investigations have found widespread expression differences between Neanderthal and MH alleles [11, 12], many of which are hypothesized to contribute to trait variation in diverse MHs [17–21]. Phenotypes associated with Neanderthal ancestry range from immune system response [18, 19, 22–29], hair and skin coloration [18, 19, 30–32], metabolism [33–36], cardiopulmonary function [19, 37], skeletal morphology [19, 38], and behavior [18, 19]. However, since most regions of MH genomes have little or no evidence of introgression [11, 12, 30, 31, 39–41], considering only introgressed variation provides a very limited view into hominin biology and cannot address why certain regions of MH genomes tolerated Neanderthal DNA better than others.

Colbran et al. [13] addressed this challenge by inferring AH gene regulation genome-wide through predictive models trained on gene expression data in MHs [42]. They estimated that over 1900 genes had different patterns of regulation between AHs and MHs. However, the specific molecular mechanisms through which archaic variants alter gene expression remain unclear. Gokhman et al. [43] and Batyrev et al. [44] aimed to elucidate these mechanisms by computationally reconstructing maps of AH DNA methylation. They found 2,000 differentially methylated regions that associate with genes predominantly related to facial and limb anatomy. Together, these illustrate the potential to mechanistically link archaic genotypes with regulatory functions via prediction of molecular phenotypes.

Yet, previous work has been unable to address a fundamental aspect of gene regulation and genome function—the physical three-dimensional (3D) organization of the genome. Regulation of gene expression is facilitated by the 3D looping and folding of chromatin in the cell nucleus, which is central to enhancer-promoter (E-P) communication and insulation [45–52]. The 3D genome also plays a role in determining cell-type identity, cellular differentiation, replication timing, and risk for multiple diseases [53–59]. Advances in chromosome-conformation-capture technologies (3C, 4C, 5C, Hi-C, MicroC) [60–64] allow quantification of genome folding at increasing resolution from chromosomal territories, megabase-scale topologically associating domains (TADs), to smaller-scale loops [62] and “architectural stripes,” which can reflect enhancer activity and gene activation [65–67]. Disrupting 3D genome folding can cause

83 inappropriate E-P interactions and alter gene expression in ways that lead to disease [49, 50, 68–72]. Ac-  
84 cordingly, there is preliminary evidence suggesting the 3D genome constrains variation at different scales  
85 of evolution [73–77] and that reorganization of chromatin may contribute to gene regulatory evolution  
86 and inter-species gene expression divergence [78].

87 Thus, to fully understand the consequences of genetic variation between AHs and MHs, we must  
88 consider the 3D genome folding. However, the role of 3D genome organization in the divergence between  
89 AHs and MHs has never been explored because chromatin contacts cannot be assayed in ancient DNA.  
90 3D genome folding is facilitated by a complex interplay of CTCF binding with cohesin and other ar-  
91 chitectural factors [50, 62, 79, 80]. Recent deep learning methods have been developed that learn the  
92 sequence “grammar” underlying 3d genome folding patterns [81–84]. We hypothesized that these deep  
93 learning methods would allow us to infer genome-wide 3D chromatin contact maps of Neanderthals and  
94 Denisovans. Because the molecular mechanisms that determine genome organization, like CTCF bind-  
95 ing and co-localization with cohesin, are largely evolutionarily conserved [85, 86], models trained using  
96 human data perform well even when applied to DNA sequences from distantly related species, such as  
97 mouse [82]. Thus, unlike genome-wide methods for predicting organism-level phenotype (e.g., polygenic  
98 risk scores), these models can be applied across diverse hominins.

99 To elucidate the contribution of 3D genome folding to recent hominin evolution, we apply novel deep  
100 learning methods for inferring 3D genome organization from DNA sequence patterns to Neanderthal,  
101 Denisovan, and diverse MH genomes. Using the resulting genome-wide 3D genome folding maps, we  
102 identify 167 loci that are divergent in 3D organization between AHs and MHs. We show that these 3D-  
103 diverged loci are enriched for physical links to genes related to the function and morphology of the eye,  
104 supra-orbital ridge, hair, lung function, immune response, and cognition. We also find that 3D genome  
105 organization constrained recent human evolution and patterns of introgression. Finally, we evaluate  
106 the legacy of introgression on the 3D organization of humans and identify examples where introgression  
107 imparted divergent 3D genome folding to Eurasians. In summary, our application of deep learning to  
108 predict archaic 3D genome folding provides a window into previously unobservable molecular mechanisms  
109 linking genetic differences to phenotypic consequences in hominin evolution.

## 110 3 Results

### 111 3.1 Reconstructing the 3D genome organization of archaic hominins

112 To evaluate the role of 3D genome organization changes in recent human evolution, we apply deep  
113 learning to infer 3D genome organization from DNA sequences of archaic hominins (AHs) and modern  
114 humans (MHs) (Fig. 1). We consider the genomes of four AHs—one Denisovan and three Neanderthals,  
115 each named for where they were discovered (*Altai* mountains, *Vindija* and *Chagyrskaya* caves) [1–4]. We  
116 compare these to 20 diverse MHs from the 1000 Genomes Project (Table S1) [87].

117 For each individual, we predict chromatin contact maps across the genome. Each contact map gives  
118 a 2D representation of the predicted 3D chromatin physical contacts, which will refer to as “3D genome  
119 organization”. We predict these maps using approximately 1 Mb (1,048,576 bp) tiled sliding windows  
120 overlapping by half with Akita, a convolutional neural network (CNN) trained on high-quality experi-  
121 mental chromatin contact maps (Hi-C and Micro-C) [82]. Each resulting contact map represents pairwise  
122 physical 3D contact frequencies at approximately 2 kb (2,048 bp) resolution for a single individual. Pre-  
123 vious work demonstrated that Akita accurately infers 3D contact organization at this resolution [82]. We  
124 only consider windows with full (100%) sequence coverage in the MH reference, and we conservatively  
125 mask missing archaic sequence with the human reference sequence (Figs. S1,S2,S3 and Methods).

126 We compare contact maps from two genomes using a “3D divergence” score, namely, one minus  
127 the Spearman’s rank correlation coefficient ( $1 - \rho$ ) for all pixels in the maps. Genomic windows with  
128 more different 3D genome maps have higher 3D divergence and, conversely, a window with lower 3D  
129 divergence will reflect more 3D similarity (Fig. 1). Other divergence metrics (e.g., based on Pearson’s  
130 correlation coefficient and mean squared difference) are strongly correlated (Fig. S4). Akita is trained

131 simultaneously on Hi-C and Micro-C across five cell types in a multi-task framework. In the main text  
132 we focus on predictions from the highest resolution cell type, human foreskin fibroblast (HFF). Results  
133 are similar when considering other cell types (e.g. embryonic stem cells) (Fig. S5), likely because of  
134 limited cell-type-specific differences in both available experimental data and model predictions [82].

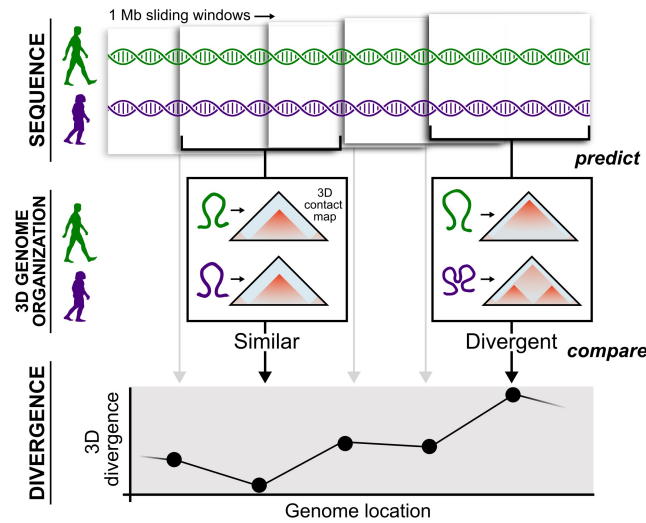

**Figure 1: Reconstructing the 3D genome organization of archaic hominins.** We infer 3D genome organization from sequence across the genomes of modern humans (MHs, green) and archaic hominins (AHs, purple). Using approximately 1 Mb (1,048,576 bp) sliding windows (overlapping by half), we input the genome sequences into Akita, a convolutional neural network, to predict 3D genome contact maps [82]. The resulting contact maps are compared between MHs and AHs to identify regions that have similar 3D genome organization (left, low divergence) and regions that have different 3D organization (right, high divergence).

## 135 3.2 Archaic hominin and modern human genomes exhibit a range of 3D 136 divergence

137 Reconstructing the genome-wide 3D genome organization of AHs and MHs revealed genomic windows  
138 with a range of 3D divergence (Fig. 2A). Most of the genome has very similar 3D genome organization  
139 between AHs and MHs (circle example in Fig. 2A-B). However, we also found regions of AH-MH 3D  
140 genome divergence. Some of these differences are changes in predicted chromatin contact intensity but  
141 similar overall organization (diamond example in Fig. 2A-B). Others reveal reorganization with evidence  
142 of new sub-organization (neo-TADs or -loops) or lost structures (fused TADs or loops) (indicated with an  
143 “x” example in Fig. 2A-B). At the 95<sup>th</sup> percentile of observed divergence, differences in the contact maps  
144 are substantial. However, because the 3D divergence measure considers the entire window, strong focal  
145 changes may not rank as highly as structural differences that influence a large segment of the window  
146 (diamond vs. “x” examples in Fig. 2B).

147 To illustrate genome-wide patterns of divergence in 3D organization, we plotted the average divergence  
148 of each of the AHs to five modern African individuals from different subpopulations (Fig. 2C). We show  
149 the landscape of 3D divergence across the entire genome for all four AHs in Fig. S6. Some AH-MH  
150 divergences are shared across all four archaics, while others are specific to a single lineage like the  
151 Denisovan individual (Fig. 2C). We only considered sub-Saharan Africans in these comparisons, because  
152 they have low levels of AH introgression. We consider how introgressed variation in Eurasians influences  
153 3D divergence in a subsequent section.

## 154 3.3 3D genome organization diverges between AH and MH at 167 genomic 155 loci

156 To consistently identify regions with divergent 3D genome organization between AH and MH, we com-  
157 pared the 3D contact maps at each locus for each AH to 20 MH (African) individuals. We applied

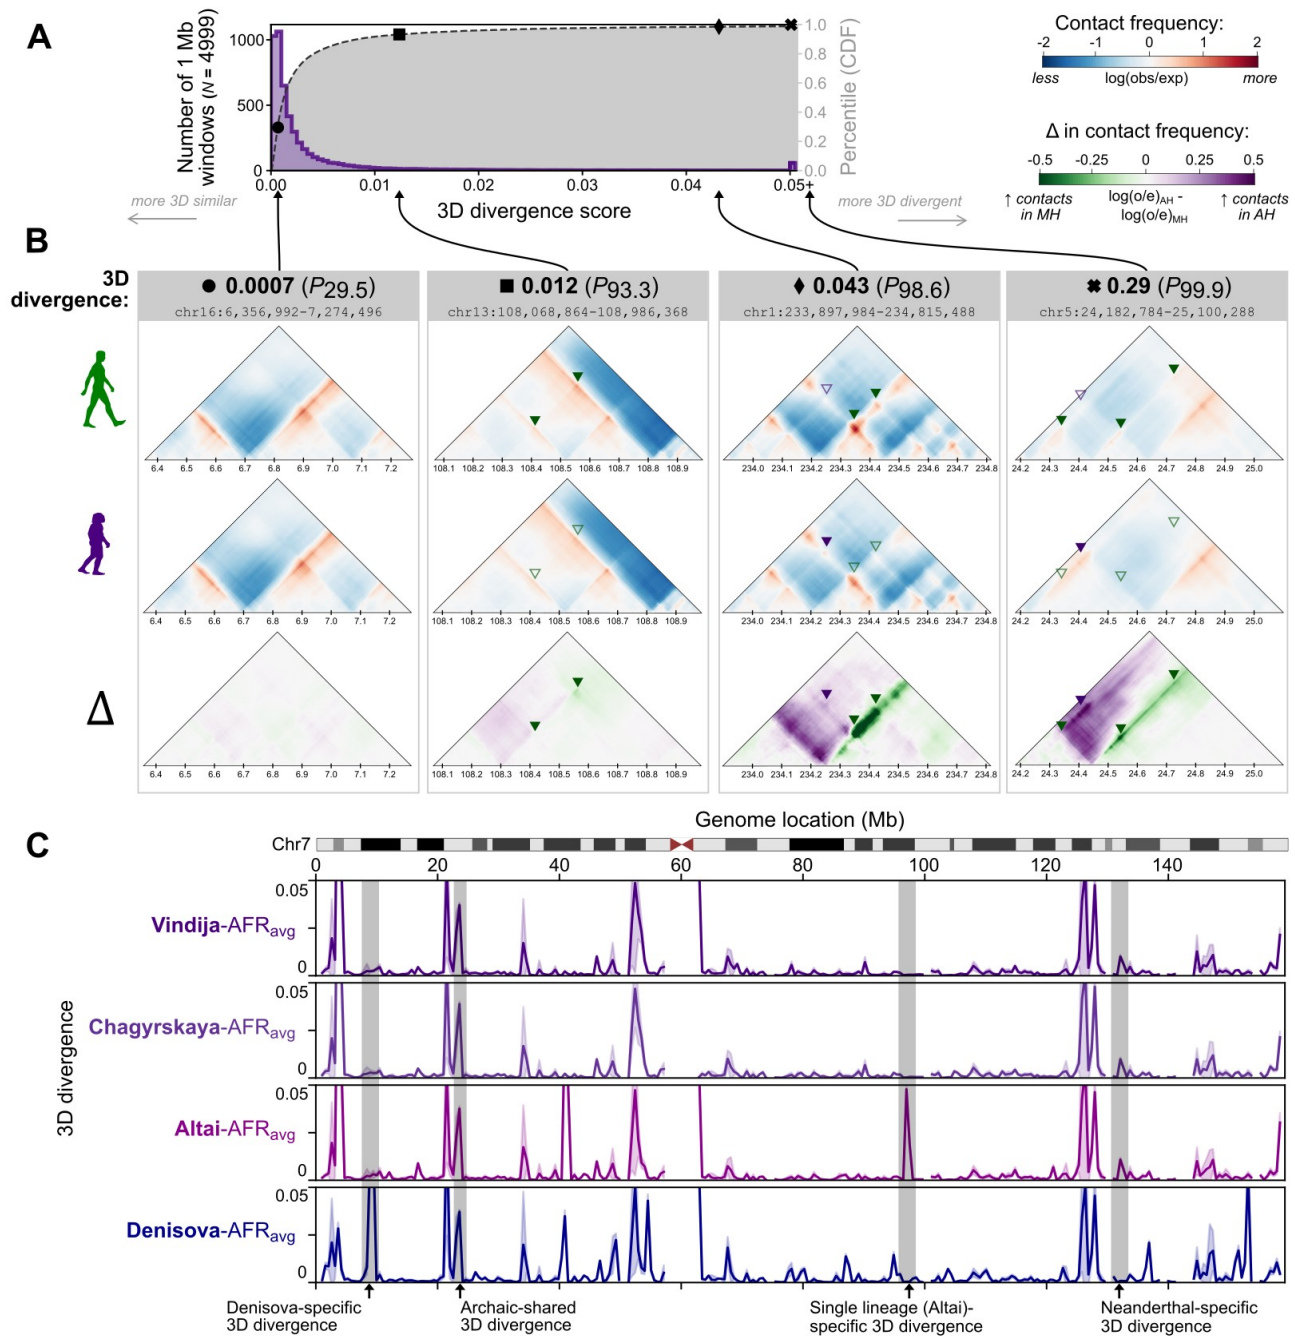

**Figure 2: 3D genome divergence between archaic hominins (AHs) and modern humans (MHs) varies across the genome.** (A) Distribution of 3D genome divergence between AHs and modern humans MHs for 1 Mb windows across the genome. Most windows have similar 3D genome organization between MHs and AHs (low 3D divergence). The cumulative density function (CDF) of this distribution is overlaid in gray with percentiles on the right vertical axis. (B) We highlight four examples (shapes) along the 3D divergence distribution illustrating low 3D divergence (left) to high divergence (right). Each example compares a representative African MH (top, HG03105) to a Neanderthal (bottom, Vindija) in terms of both raw score and relative percentile of 3D divergence. Examples with scores near the 95<sup>th</sup> percentile have visible contact map differences, but the type of differences vary from re-organization (neo-TADs or TAD-fusions) to altered contact intensity (stronger vs. weaker TAD/loop). Green and purple triangles indicate regions with increased contact frequency in MH versus AH, respectively. (C) Average 3D divergence along chromosome 7 between AHs and five representative African MHs. The error band indicates the 95% confidence interval (CI). Comparing the 3D genomes of Neanderthals (purple) or Denisova (blue) with MHs reveals windows of both similarity and divergence (peaks). Featured examples (gray overlays) highlight regions of 3D divergence that are shared (e.g., shared across all archaics) or lineage-specific (e.g., specific to the Denisovan individual).



158 a conservative procedure that required all 20 AH-MH comparisons to be more 3D divergent than all  
159 MH-MH comparisons (Fig. 3A). In other words, the differences between the 3D genome organization  
160 of an AH to all MHs must be more extreme than the differences between each MHs to all other MHs.  
161 Furthermore, we required the average AH-MH 3D divergence to be in the 80<sup>th</sup> percentile of the most  
162 diverged. This identified regions with consistent 3D differences between AHs and MHs (Fig. 3A, left)  
163 while excluding regions with a large 3D diversity in modern humans (Fig. 3A, right) (Methods).

164 We find 167 total AH-MH consistently 3D diverged loci: 67, 70, 71, and 73 for Altai, Vindija,  
165 Chagyrskaya, and Denisova compared to MHs, respectively (Fig. 3B). 3D diverged loci are found through-  
166 out the genome on every chromosome (Fig. 3B). As suggested by Fig. 2C, some 3D divergences are shared  
167 by all four AHs ( $N = 7$ ), and many are shared by all three Neanderthals ( $N = 43$ ) (Fig. 3B). We sum-  
168 marize the AH-MH 3D divergent windows in Tables S2,S3 and report a larger set of windows based on  
169 less conservative criteria in Table S4.

170 To illustrate the properties of a AH-MH 3D divergent window, we highlight a divergent locus on  
171 chromosome 2 that is nearby several immune genes (Fig. 3C). MHs have an approximately 140 kb loop  
172 linking the promoter of *ICOS* at 204.80 Mb to a CTCF motif at 204.94 Mb. This CTCF motif is  
173 overlapped by many ChIP-seq peaks for transcription factors (TFs) involved in determining chromatin  
174 folding (CTCF, RAD21, SMC3, and ZNF143). The contact maps for both Vindija and Altai Neanderthal  
175 show a more prominent “architectural stripe”—an asymmetric loop-like contact often reflecting enhancer  
176 activity [65–67]—starting near the promoter of *ICOS*. However, in contrast to MHs, the loop does not  
177 end at the same CTCF site and instead has greater contact frequency with a CTCF site at 205.2 Mb.  
178 Thus, the resulting loop in Neanderthals is predicted to be over 400 kb—three times as large as the MH  
179 loop.

180 To determine which AH-MH nucleotide differences cause the largest change in the contact maps, we  
181 used *in silico* mutagenesis (Methods). Using an African MH (HG03105) background, we inserted every  
182 allele unique to the AH genome one-by-one and measured the resulting 3D genome divergence. This  
183 identifies the archaic variant resulting in the largest 3D organization changes between the AH and MH  
184 genomes, a G to C change at chr2:204,937,347 (Methods). This change disrupts a high information-  
185 content site in the CTCF binding site described above. All MHs carry an ancestral C allele, but Vindija  
186 and Altai have a derived G allele. In summary, we predict that the Neanderthal-derived allele weakens  
187 CTCF binding leading to reduced insulation between *ICOS*, a T-cell costimulator, with downstream  
188 contacts.

### 189 3.4 Regions with 3D divergence highlight AH-MH phenotypic differences

190 To explore the functional effects of AH-MH 3D genome divergence, we tested for phenotypic annotation  
191 enrichment. We considered the 43 loci with shared divergence between MHs and all three Neanderthals  
192 (Fig. 3B). Although the loci were identified at approximately 1 Mb resolution, most 3D modifications  
193 disrupt a smaller sub-window. Thus, as described in the example above (Fig. 3C), we used *in silico*  
194 mutagenesis to identify the AH-MH sequence change(s) that produced the largest disruption in the  
195 contact maps. We will refer to these as “3D-modifying variants” (Methods). We then intersected the  
196 predicted 3D-modifying variants with experimentally defined TADs to determine the genes to which they  
197 are physically linked. Ultimately, we found 88 physical links to protein-coding genes (85 unique genes)  
198 for the 45 3D-modifying variants in the 43 Neanderthal-MH 3D divergent loci (Tables S2,S5).

199 We tested if these genes are enriched for phenotypic annotations using both gene-phenotype links  
200 from rare disease (OMIM Human Phenotype Ontology [HPO] terms) and common disease databases  
201 (GWAS Catalog 2019) [88–92]. 3D genome organization perturbation has been linked to both types  
202 of disease: large-scale disruption leading to severe disease and subtle changes in regulatory insulation  
203 contributing to complex traits disease [69–72, 74]. We find links to 271 and 208 candidate traits from  
204 the rare and common disease ontologies, respectively. For each trait, we test if the observed overlap  
205 with 3D divergent loci is more than expected by chance using an empirically-generated null distribution  
206 (Methods). In summary, this sequential process links 3D divergent windows to variants to TADs to genes

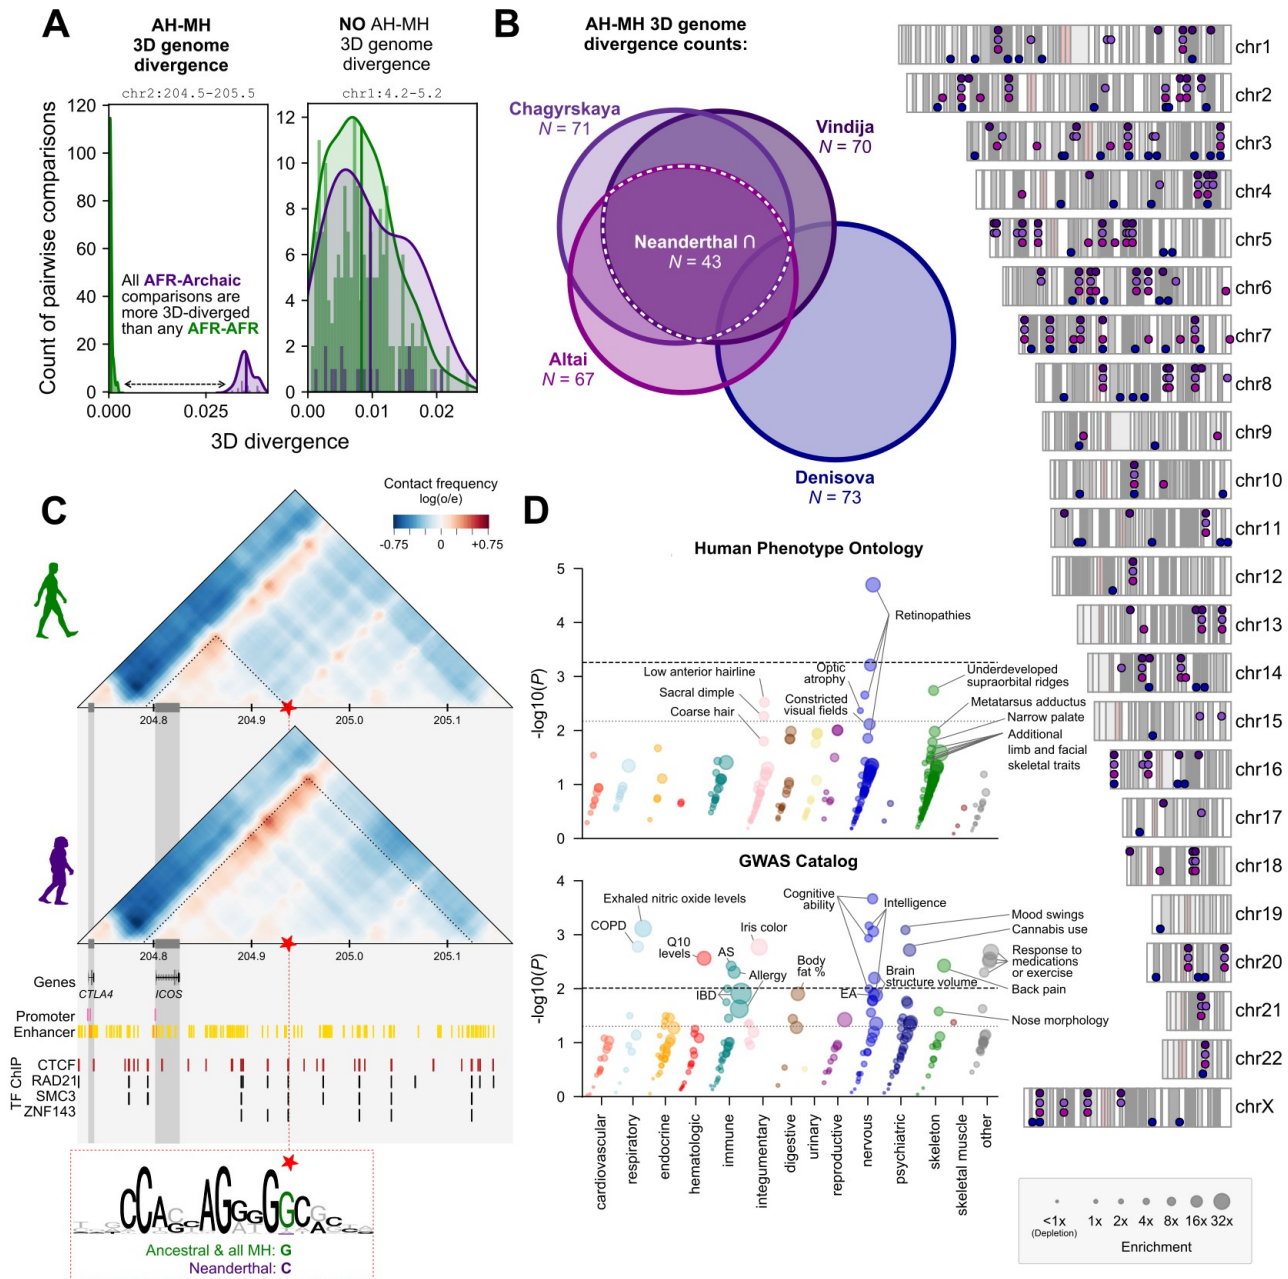

**Figure 3: Regions with 3D divergence between MHs and AHs highlight loci linked to phenotypic differences.** (A) We identified genomic windows with 3D divergence between AH and MH by comparing distributions of pairwise divergence in 3D contact maps. We used a conservative procedure that required all 20 comparisons of each AH to 20 MH (African) individuals (purple,  $n = 20$ ) to be more 3D-diverged than all MH-MH comparisons (green,  $n = \binom{20}{2} = 190$ ) and the mean of the AH-MH divergences (purple) to be in the 95<sup>th</sup> percentile of most diverged. The left plot shows an example that meets these criteria (chr2:204,472,320-205,520,896). The right plot shows an example where there is diversity in 3D genome organization, but not an AH-MH divergence (chr1:4,194,304-5,242,880). (B) We identified 167 AH-MH 3D divergent windows across the genome. Many are shared (Euler-diagram), but some are unique to a single lineage, with the most unique divergence in the Denisovan. (C) Contact maps for the example Neanderthal-MH 3D divergent window shown in A (zoomed to chr2:204,722,176-205,166,592). All MHs have a smaller domain insulated by a CTCF site (red star). In Neanderthals (Vindija and Altai), the CTCF motif is disrupted with a C instead of a G (red dashed box, chr2:204,937,347). We predict that this leads to ectopic connections with the promoter of *ICOS* (T-cell costimulator). (D) Phenotype enrichment for the 43 Neanderthal 3D divergent loci identified in B (white dashed line). We computed functional annotation enrichment for genes physically linked to 3D-modifying variants at these 3D divergent loci using HPO (top,  $n = 271$ ) and GWAS catalog (bottom,  $n = 208$ ) annotations (Methods). Within each phenotypic domain, traits are organized along the vertical axis by significance and along the horizontal axis by enrichment (also indicated by size). Genes nearby AH-MH 3D divergence are enriched for functions related to the retina and visual field, skeletal morphology (notably, supra-orbital ridge), hair, lung function, immune and medication response, and cognitive traits. Significance lines represent the  $P$ -value thresholds that controls the FDR with  $q = 0.05$  (dotted) and  $q = 0.1$  (dashed). (COPD: chronic obstructive pulmonary disease, AS: ankylosing spondylitis, IBD: inflammatory bowel disease, EA: educational attainment)

207 and, ultimately, phenotypes (Fig. S7).

208 With the HPO annotations, we found enrichment for effects of these genes related to the eye  
209 (retinopathies, optic atrophy, constricted visual field [most significant association:  $27\times$  enriched,  $P =$   
210  $2 \times 10^{-5}$ ]), skeletal system (notably, supraorbital ridge morphology [ $12\times$ ,  $P = 0.002$ ]), and hair (e.g.  
211 low anterior hairline [ $12\times$ ,  $P = 0.003$ ]) (Fig. 3D, top). In the GWAS Catalog annotations, we find  
212 enrichment related to intelligence and cognition ( $13\times$ ,  $P = 0.0002$ ), lung function (NO levels, COPD  
213 [ $35\times$ ,  $P = 0.0008$ ]), response to certain medications ( $30\times$ ,  $P = 0.002$ ), immunologic response (ankylosing  
214 spondylitis, allergy, inflammatory bowel disease [ $12\times$ ,  $P = 0.004$ ]), and brain region volumes (putamen,  
215 subcortex [ $17\times$ ,  $P = 0.006$ ]) (Fig. 3D, bottom). Trait enrichments for 3D-modifying variants found in  
216 Denisova are highlighted in Fig. S8. Because Denisova and Neanderthal share many alleles, some similar  
217 traits are enriched (retinopathy, intelligence, lung function, etc.); however, overall, we find fewer enriched  
218 traits.

219 In summary, genomic loci with 3D divergence between Neanderthals and MHs are enriched for physical  
220 proximity to genes associated with a diversity of traits related to the skeleton, eye, hair, lung, immune  
221 response, brain region volume, and cognitive ability. These findings align with and expand what we know  
222 from both the fossil-record and previous work based on variants in MHs [11, 14–20]. Importantly, our  
223 approach permitted the interrogation of variants unobserved in MHs (76% of predicted 3D-modifying  
224 variants), and it provides a putative molecular mechanism for the phenotypic differences.

### 225 3.5 Relationship between sequence divergence and 3D divergence

226 Given that we observe 3D differences between AH and MH genomes, we quantified the relationship  
227 between 3D and sequence divergence on both genome-wide and more local scales. First, we computed  
228 the genome-wide 3D genome divergence for all pairs of AH and MH individuals. We find the mean 3D  
229 genome divergence largely follows sequence divergence (Figs. 4A,S9). Neanderthals are the most similar  
230 in 3D genome organization to other Neanderthals, then to the Denisova, and then to MHs (mean 3D  
231 divergences:  $9.8 \times 10^{-4}$ ,  $3.4 \times 10^{-3}$ , and  $4.3 \times 10^{-3}$ , respectively). Genome-wide 3D divergence also tracks  
232 with sequence divergence within the Neanderthal: Vindija and Chagyrskaya are more similar than they  
233 are to the outgroup Altai (Vindija-Chagyrskaya mean 3D divergence of  $8.4 \times 10^{-4}$  vs. Vindija-Altai of  
234  $1.0 \times 10^{-3}$ ) [3].

235 Next, we evaluated if sequence divergence and 3D divergence are correlated on the local scale. We  
236 find a very weak positive relationship between 3D and sequence divergence at the 1 Mb window level  
237 (Fig. 4B,  $r^2 = 0.01$ ,  $P = 2.3 \times 10^{-13}$ ). As suggested by the weak correlation, many windows with low  
238 sequence divergence have high 3D divergence, and many windows with high sequence divergence have  
239 low 3D divergence.

240 Given the weak relationship between sequence and 3D divergence, we sought to identify some proper-  
241 ties of sequence differences that result in large 3D divergence. Based on the importance of CTCF-binding  
242 in maintaining 3D genome organization [50, 62, 79, 80], we quantified the effects of AH-MH nucleotide  
243 differences overlapping CTCF binding motifs. Disruption of CTCF binding sites is important, but not  
244 all disruptions are likely to influence 3D divergence. Leveraging additional functional genomics data on  
245 CTCF binding and TAD boundaries, we find that the quantity, quality, and context (e.g., strength of a  
246 motif and proximity to a TAD boundary) influence whether AH-MH sequence divergence will result in  
247 a 3D organization divergence (Fig. S10). For example, if a window has at least one AH-MH nucleotide  
248 difference overlapping a strong CTCF-bound motif near a TAD boundary (within 15 kb), the AH-MH 3D  
249 divergence is 1.64-times greater ( $P = 0.00077$ ,  $N = 260/4999$  windows, Fig. 4B). Thus, we are observ-  
250 ing complex sequence patterns underlying 3D genome folding that could not be determined by simply  
251 considering sequence divergence or intersecting AH variants with all CTCF sites. This is concordant  
252 with previous results which suggest that 3D genome folding is governed by a complex CTCF binding  
253 grammar [50, 80, 82, 83].



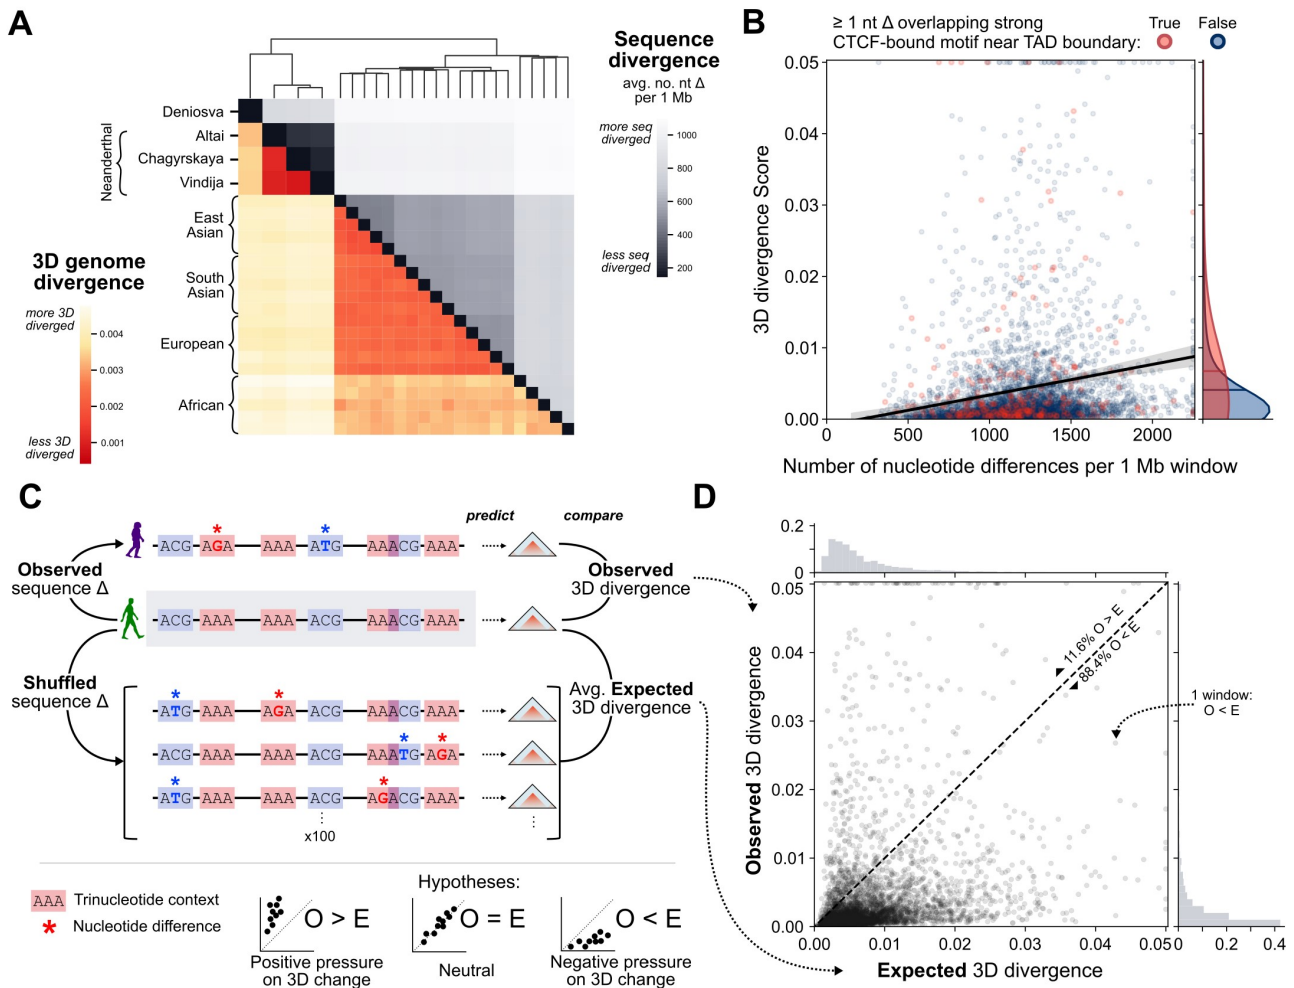

**Figure 4: 3D genome organization constrained human sequence divergence.** (A) 3D genome divergence (lower triangle) follows patterns of sequence divergence (upper triangle). AHs have more similar 3D genome organization to each other than to 15 MHs from different 1000G super-populations. Clustering is based on sequence divergence; see Fig. S9 for clustering by 3D genome divergence and data for each sub-population. (B) Sequence divergence is only very modestly correlated with 3D genome divergence ( $r^2 = 0.011$ ,  $P = 2.3 \times 10^{-13}$ ,  $N = 4999$ ). Each point represents a 1 Mb window from a genome-wide comparison between the 3D genome organization of a Neanderthal (Vindija) and African MH (HG03105) individual and the black line with band represents a linear regression with 95% CI. Windows with large 3D divergence are enriched for MH-AH nucleotide (nt) differences overlapping a strong CTCF-bound motif within 15 kb of a TAD boundary (red) (two-tailed Mann-Whitney  $U$   $P = 0.00077$ ). (C) To evaluate whether 3D genome organization constrained sequence divergence, we estimate the null distribution of expected 3D divergence based on sequence differences between the Neanderthal (Vindija) and African MH (HG03105) genomes. We shuffle observed nucleotide differences (stars) while preserving tri-nucleotide context (colored rectangles) and predict 3D genome organization for 100 shuffled sequences for each window. Under a model of no sequence constraint due to 3D organization, observed 3D divergence would equal the expected 3D divergence ( $O = E$ ). Alternatively, observing more 3D divergence than expected would suggest positive selection on sequence changes that cause 3D divergence ( $O > E$ ). Finally, observing less 3D divergence than expected would suggest negative pressure on sequence changes that cause 3D divergence ( $O < E$ ). (D) Observed 3D divergence is significantly less than the mean expected 3D divergence based on sequence ( $O < E$ : 88.4% of  $N = 4,999$  windows below the diagonal, binomial-test  $P < 5 \times 10^{-324}$ ). The mean expected 3D divergence is on average 1.78-times higher than the observed 3D divergence ( $t$ -test  $P = 1.8 \times 10^{-48}$ ). 3D divergence scores greater than 0.05 and nucleotide differences greater than 2250 are clipped to the baseline for visualization purpose

### 3.6 Maintenance of 3D genome organization constrained sequence divergence in recent hominin evolution

Next, we evaluated if the pressure to maintain 3D genome organization constrained recent human sequence evolution. We estimated whether the amount of 3D divergence between AHs and MHs is more or less than expected given the observed sequence divergence. To compute the expected 3D divergence distribution for each 1 Mb window, we shuffled observed nucleotide differences between an African MH (HG03105) and AH (Vindija Neanderthal) 100 times and applied Akita to predict the resulting 3D genome divergence (Fig. 4C). We controlled for the non-uniform probability of mutation across sites using a model that preserved the tri-nucleotide context of all variants in each window with each shuffle. For each 1 Mb window, we compared the observed 3D divergence with the expected 3D divergence from the 100 shuffled sequences with the same nucleotide divergence.

If the 3D genome does not influence sequence divergence, the observed 3D divergence would be similar to the expected 3D divergence (Fig. 4C, bottom-middle). Alternatively, if the observed 3D divergence is greater than expected based on sequence divergence (Fig. 4C, bottom-left), this suggests positive selection on variation contributing to 3D differences. Finally, if the observed 3D divergence is less than expected based on sequence divergence (Fig. 4C, bottom-right), this suggests negative pressure on variation contributing to 3D differences.

We find that observed 3D divergence is significantly less than expected based on sequence divergence (Fig. 4D). 88.4% of 1 Mb windows have less 3D divergence than expected based on their observed sequence differences (binomial-test  $P < 5 \times 10^{-324}$ ). Genome-wide, the mean expected 3D divergence is 78% higher than the observed 3D divergence ( $t$ -test  $P = 1.8 \times 10^{-48}$ ). This suggests that, in recent hominin evolution, pressure to maintain 3D genome organization constrained sequence divergence. This aligns with previous studies that demonstrated depletion of variation at 3D genome-defining elements (e.g., TAD boundaries, CTCF sites) [73–77], but it specifically implicates 3D genome folding.

### 3.7 3D genome organization constrained introgression in MHs

Eurasian individuals have on average 2% AH ancestry due to introgression; however, AH ancestry is not evenly distributed throughout the genome [2, 15, 31]. Our previous analyses demonstrate that AH and MH exhibit a range of 3D genome organization divergence across the genome (Fig. 2C) and that pressure to maintain 3D genome organization constrained sequence divergence (Fig. 4D). Thus, we hypothesized that for a given genomic window, its tolerance to 3D genome organization variation in MHs would influence the probability that introgressed AH DNA is maintained in MH.

To test this, we first quantified the levels of 3D genome diversity for 20 modern Africans in 1 Mb sliding windows across the genome. We then computed the average African-African 3D genome divergence and term this “3D genome variability”. Genomic windows with low 3D genome variability have similar 3D genome organization among all Africans, suggesting these loci are less tolerant of 3D folding changes. In contrast, regions with high 3D genome variability suggest a diversity of 3D genome organization present. Finally, we computed the amount of introgressed sequence in Eurasian populations for each window (Methods, [93]).

Genomic windows with high levels of introgression across Eurasians are enriched for windows with higher 3D genome variability (Fig. 5A, Mann-Whitney U  $P = 0.0007$ ). On average, windows with evidence of introgression have 72% higher 3D genome variability than windows without introgression. Moreover, the magnitude of 3D genome variability is predictive of the average amount (proportion of bp) of introgressed sequence remaining in a 1 Mb window ( $P = 5.7 \times 10^{-9}$ , Fig 5B, vertical axis). Even when conditioning on sequence variability, 3D genome variability provides additional information about the amount of AH ancestry in a window (Fig 5B, conditional  $P = 5.7 \times 10^{-4}$ ). In other words, even if two windows have the same level of sequence variability in MHs, windows that are more 3D variable are more likely to retain introgressed sequence. We also find that 3D genome variability is more strongly predictive of introgression shared among all three super-populations than an introgressed sequence unique

302 to a single super-population (Supplemental Text, Tables S7,S8). Using earlier introgressed Neanderthal  
 303 haplotype predictions from Vernot et al. [15] and other thresholds yield similar results (Figs. S11,S12).  
 304 Because we compute variability in Africans with very low levels of AH ancestry, the increased 3D genome  
 305 variability in MHs is not a result of introgression.

306 These results suggest that 3D genome organization shaped the landscape of AH introgression in  
 307 modern Eurasian genomes. Previous findings demonstrated Neanderthal ancestry is depleted in regions  
 308 of the genome with strong background selection, evolutionary conservation, and annotated molecular  
 309 function (e.g. genes and regulatory elements) [11, 30, 31, 40, 41]. Our results expand this to implicate  
 310 the 3D genome as a contributor to the landscape of AH ancestry in MHs today.

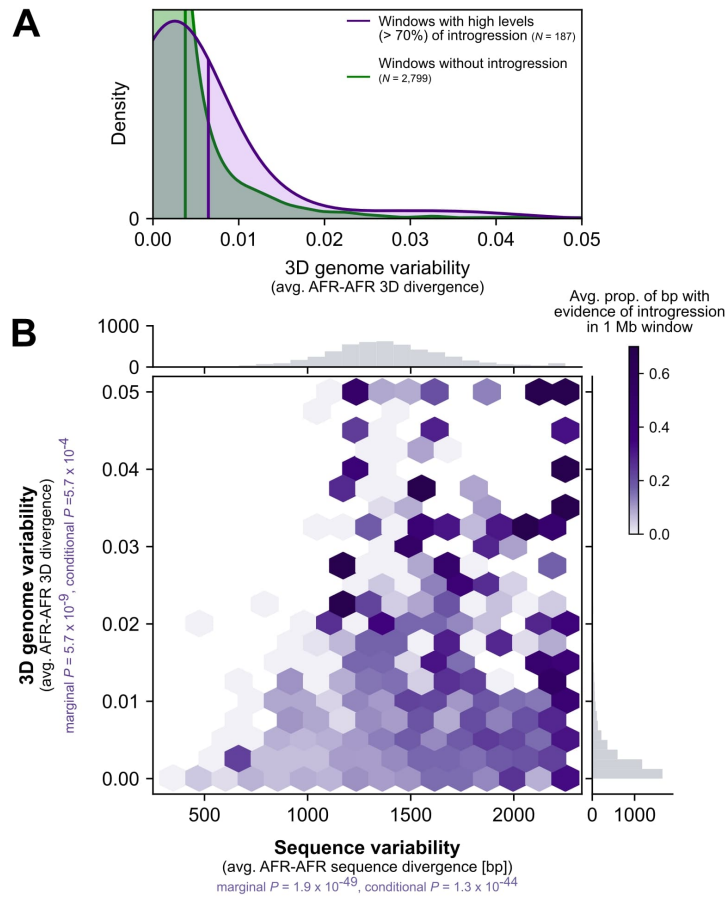

**Figure 5: 3D variable windows in MH have more evidence of AH introgression.** (A) Windows with high levels of introgression across present-day non-African populations (purple,  $N = 187$ ) are more 3D-variable in modern Africans (horizontal axis) than windows without evidence of introgression (green,  $N = 2,799$ ; two-tailed Mann–Whitney  $U P = 0.0007$ ). Vertical lines represent the distribution means. Introgression is called based on Sprime [93]. To focus on regions consistently tolerant of AH ancestry, we considered introgression shared across 1000 Genomes super-populations and covering at least 70% of bases in a 1 Mb window (Methods). Results from other introgression sets and thresholds are similar (Figs. S11–S12 and Tables S7–S8). (B) The relationship between sequence variability (horizontal axis) and 3D genome variability (vertical axis) with amount of AH ancestry in a window. Darker purple indicates a higher proportion of introgression in a 1 Mb genomic window. Sequence variability ( $P = 1.9 \times 10^{-49}$ ) and 3D genome variability ( $P = 5.7 \times 10^{-9}$ ) both independently predict amount of introgression. Additionally, even when controlling for sequence variability in a window, 3D genome variability is informative about the amount of introgression ( $P = 5.7 \times 10^{-4}$ ).

### 311 3.8 Introgression shaped the 3D genome organization of present-day Eurasians

312 Given the differences between AH and MH 3D genome organization at many loci, we hypothesized that  
 313 introgressed AH sequences could have introduced novel 3D contact patterns to Eurasian MHs. To test  
 314 this, we integrated Eurasians into our previous comparisons of AHs and African MHs.

315 For example, we found an AH-MH 3D divergent window on chromosome 7 with a striking pattern of  
 316 3D genome diversity across modern Eurasians (Fig. 6A). As required to be an AH-MH divergent locus,

317 the 3D genome divergence between all Africans and AH (Vindija Neanderthal) was consistently high.  
318 And, out of 15 Eurasians, 11 had similar divergent organization compared to the Neanderthal 3D contact  
319 map. However, four Eurasians had very low 3D divergence from the Neanderthal.

320 When examining the contact maps of this window, all Africans have a large approximately 450 kb loop  
321 domain starting near the promoter of *IGFBP3*, a gene encoding insulin-like growth factor binding protein  
322 3 (Fig. 6B). In contrast, Neanderthals (Vindija, Chagyrskaya, and Altai) have two smaller sub-domains  
323 insulated by a CTCF site. Using *in silico* mutagenesis, we identify that the variant with the largest  
324 effect on 3D organization is a G to A change at chr7:46,169,621 (rs12536129). The derived A allele,  
325 which strengthens the CTCF motif, appeared along the Neanderthal lineage. The four Eurasians (two  
326 Europeans (EUR), two South Asians (SAS)) with 3D genome organization very similar to Neanderthals  
327 all have an introgressed haplotype carrying the Neanderthal-derived A allele overlapping this CTCF site  
328 [94]. None of the other 11 Eurasians have introgression at this site (although some have introgression in  
329 the larger 1 Mb window). Across human populations, this introgressed allele remains at high-frequency  
330 today, especially in Peru (28% AMR, 2% EAS, 16% EUR, 11% SAS, 0% AFR, Fig. S13A).

331 In addition to influencing the strength of a CTCF site, this introgressed allele is also an eQTL in  
332 GTEx for the physically linked gene *IGFBP3*, Insulin-like growth factor-binding protein 3 (Fig. S13B,  
333  $P = 0.00014$  in artery tissue) [42]. In MHs, this variant is associated with traits including standing  
334 height ( $P = 9.9 \times 10^{-7}$ ), fat distribution (trunk fat ratio, impedance measures,  $P = 1.3 \times 10^{-5}$ ), and  
335 diastolic blood pressure ( $P = 2.1 \times 10^{-5}$ ) (Fig. S13C).

336 Of the 191 3D-modifying variants identified in 167 AH-MH 3D diverged windows, 45 are observed  
337 in MHs (Table S2). Of note, 18 are common ( $> 5\%$  MAF) and 6 are at high frequency ( $> 10\%$ ) in  
338 at least one MH 1000 Genomes Project (1KGP) super-population which motivates the hypothesis that  
339 some introgressed 3D changes were adaptive. We find very modest non-significant enrichment for these  
340 loci in previously proposed adaptive haplotypes [94] (2.3-fold enrichment,  $P = 0.24$ ). We annotate all  
341 3D-modifying variants with their nearby genes, allele frequency, and eQTL associations in Table S5.

342 Given these examples of Neanderthal introgression contributing novel 3D folding to present-day  
343 Eurasians, we searched for similar patterns genome-wide. We considered 4,749 autosomal 1 Mb windows  
344 for 15 Eurasians (total  $n = 71,235$ ) to quantify the relationship between the amount of introgression  
345 and 3D similarity to Neanderthals. We find that the amount of introgression (bp per window) is signifi-  
346 cantly correlated with 3D divergence to the Vindija Neanderthal ( $P = 0.00011$ , Fig. 6C). Results from  
347 comparisons to the other Neanderthals are consistent (Fig. S14). On average, in a 1 Mb window, if an  
348 individual has 80% Neanderthal ancestry, their 3D genome is 2.4 times more similar to the Neanderthal  
349 3D genome than if they have no (0%) Neanderthal ancestry.

350 In summary, we find that Eurasians with more Neanderthal ancestry in a window have more Neanderthal-  
351 like 3D genome folding patterns. Furthermore, at an example locus, we demonstrate how the influence  
352 of Neanderthal introgression on 3D genome organization highlights a putative molecular mechanism for  
353 the effect of Neanderthal ancestry on human traits.

## 354 4 Discussion

355 The role of 3D genome organization in human biology is increasingly recognized [62, 73–77]; however,  
356 current techniques for measuring 3D folding cannot be applied to the study of ancient DNA. Further-  
357 more, despite methodological improvements in assays of the 3D genome, high-resolution experiments  
358 across many diverse individuals, species, and cell types remain prohibitive. To address these gaps, we  
359 provide a framework for inferring 3D genome organization at population-scale that facilitates evaluation  
360 of previously untestable hypotheses.

361 First, we apply this framework to resurrect archaic 3D genome organization. We find that 3D genome  
362 organization constrained sequence divergence and patterns of introgression in hominin evolution. We  
363 catalog genomic regions where AH and MH 3D genome organization diverged and illustrate how this novel  
364 mechanism links sequence differences to phenotypic differences. Importantly, our approach permitted



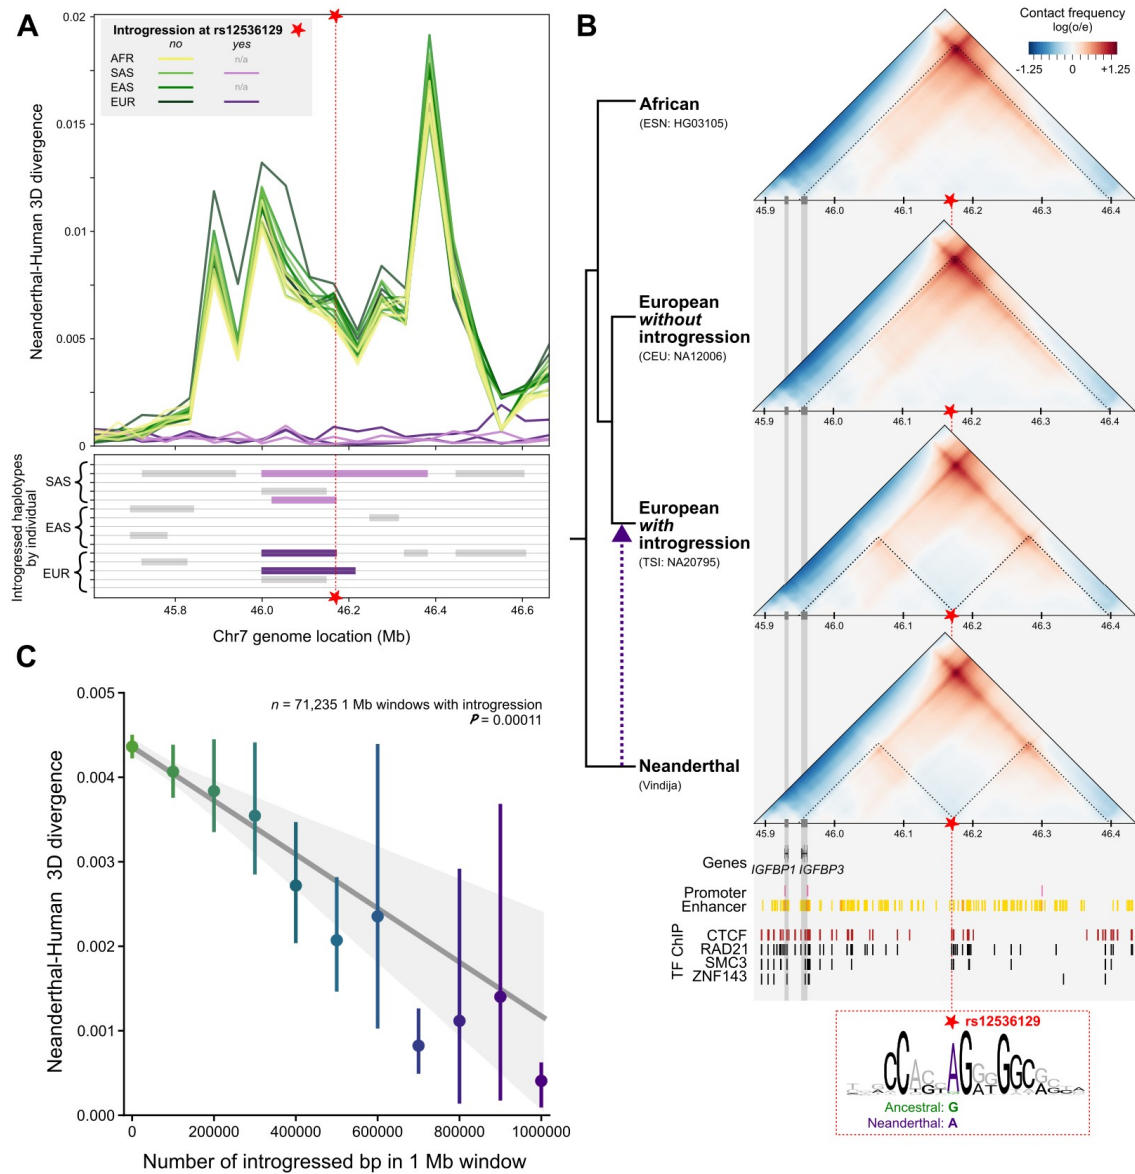

**Figure 6: Introgression introduced novel 3D genome organization patterns to modern Eurasians.** (A) Comparison of the 3D contact maps between Neanderthal (Vindija) and 20 MHs for a window on chromosome 7 reveals that most MHs (yellow, green) have different 3D organization compared to Neanderthals. In contrast, four MHs with introgression (purple boxes) overlapping chr7:46,169,621 (red star) have similar 3D organization compared to Neanderthals across this part of the genome (purple). (AFR: African, SAS: Southeast Asian, EAS: East Asian, EUR: European) This example 3D-divergent locus (B) was introgressed into MH and remains at high frequency (28% AMR, 2% EAS, 16% EUR, 11% SAS, 0% AFR, Fig. S13). At this locus (zoomed to chr7:45,883,392-46,436,352), Neanderthals and individuals with introgression have two domains insulated by a CTCF site (red box). In MHs without introgression, this motif is disrupted with a G instead of an A (star, chr7:46,169,621, rs12536129) leading to a larger fused domain and differential contacts with the promoter of *IGFBP3*. (C) The amount of introgression in a 1 Mb window (number of bp, horizontal axis) is significantly correlated with the similarity of an individual's 3D genome organization to a Neanderthal's (Vindija) genome organization (vertical axis) ( $P = 0.00011$ ,  $n = 71,235$  1 Mb windows across 15 Eurasians). The error bars signify 95% bootstrapped CIs and the error band signifies the 95% bootstrapped CI for the linear regression estimate.

365 the evaluation of variants unobserved in MHs, and it provides a putative molecular mechanism for AH-  
366 MH phenotypic differences including those that may have been selected against after hybridization (e.g.  
367 cognitive and brain morphology traits) [11, 19, 30, 31, 39–41]. Finally, we identify regions in which  
368 introgression introduced AH 3D genome folding that are novel to MHs in Eurasians with Neanderthal  
369 ancestry. Together, these results illustrate the power of imputing unobservable molecular phenotypes to  
370 resolve evolutionary questions about functional divergence.

371 Second, we anticipate that our framework for comparing and interpreting hundreds of genome-wide  
372 3D genome contact maps will be helpful for testing hypotheses beyond archaic DNA. In the interpretation  
373 of genetic variants of unknown significance, it will be key to consider the effect of inter-individual and  
374 inter-species variation on 3D genome architecture, especially given recent evidence that even common  
375 DNA sequence variants can influence 3D organization and human phenotypic variation [72]. Our work  
376 establishes the groundwork to answer many diverse questions. For example, we illustrate how *in silico*  
377 mutagenesis can highlight the role of a variant in 3D genome organization and how to integrate this  
378 with other functional annotations. This allows us to examine the 3D effects of variants never before  
379 observed in MHs, which is essential to non-coding variant interpretation from the lens of both evolution  
380 and disease. Our new measure of “3D genome variability” provides genome-wide quantification of how  
381 different regions tolerate variation in 3D genome folding. We also demonstrate a simulation approach  
382 for testing how 3D genome folding constrains sequence evolution across the genome. Finally, we develop  
383 a method to robustly identify 3D divergent windows between populations. With the recent growth of  
384 3D genome *in silico* predictors [81–84], we anticipate that our work can provide a foundation for both  
385 hypothesis generation and prioritization of experimental resources.

386 Although our approach provides many novel benefits, it also has limitations that we hope future work  
387 will address. First, our comparisons likely underestimate 3D diversity. We only investigate windows  
388 of the genome with complete sequence coverage. Because of ancient sample degradation, we do not  
389 have full coverage of AH genomes. We use a conservative approach to effectively mask regions of the  
390 genome lacking coverage in AHs (Fig. S1 and Methods). Furthermore, we only consider the effects single  
391 nucleotide variants. We do not consider structural variation (SV) due to the challenges of calling SV  
392 accurately in ancient samples. We anticipate new methods in ancient DNA sequencing will allow us  
393 to model the 3D genome organization of AHs more completely. Second, our 3D genome organization  
394 comparisons are based on a correlation-based metric. We demonstrate concordance with comparisons  
395 using other more biologically informed methods (Fig. S4); however, more sophisticated methods to  
396 quantify the type and resolution of change (e.g. neo-TAD vs TAD-fusion event, scale of TAD vs. loop)  
397 would benefit the 3D genome community [81]. Third, although Akita is trained simultaneously across  
398 five cell types, 3D genome organization is largely conserved across cell types and predictors only identify  
399 limited cell-type-specific differences. Therefore, we focused on the highest resolution predictions in a  
400 single context (HFF). As more high-resolution Hi-C and Micro-C becomes available across diverse cell  
401 types, our framework can be applied to identify cell-type-specific AH-MH differences.

402 Several practical caveats must be considered when interpreting some of our results. For example,  
403 to conduct *in silico* mutagenesis we manipulate every single nucleotide separately against the same  
404 background rather than considering the prohibitively large number of possible combinatorial variant  
405 sets. Additionally, while our null model of genome divergence accounts for context-dependent mutation  
406 probabilities, we suggest that future study of the influence of 3D folding on genome evolution would  
407 benefit from the use of forward-time genomic simulations. The annotations that link 3D-modifying  
408 variants to genes and functions are also based on studies in MHs (HPO and GWAS). It is possible,  
409 though unlikely, that a gene disrupted in MHs would not lead to the same traits in AHs. Finally, given  
410 the scope of our study and the nature of archaic DNA, direct experimental validation is not possible with  
411 current technology. To date, Gorkin et al. [72] provides the largest set of Hi-C across 19 MH individuals in  
412 the same cell type (LCL GM12878). However, the resolution is too low to call chromatin loops (40 kb vs.  
413 2 kb in our analyses), and 13 of the 19 individuals are African and have almost no Neanderthal ancestry.  
414 Thus, we use complementary experimental data, like CTCF ChIP-seq and experimentally-derived TAD  
415 maps, to provide independent support for the influence of variants on 3D genome organization and to

416 link variants with genes in true physical proximity. Moreover, even if high-resolution Hi-C were available  
417 across many Eurasians, an experimental approach would still not capture all AH variation, highlighting  
418 the necessity of our computational approach.

419 In conclusion, our framework for inferring archaic 3D genome organization provides a window into  
420 previously unobservable molecular mechanisms which shaped the sequence and phenotypic evolution of  
421 hominins.

## 422 5 Methods

### 423 5.1 Modern human and archaic genomes

#### 424 Obtaining genomes

425 All genomic analysis was conducted using the GRCh37 (hg19) genome assembly and coordinates ([www.ncbi.nlm.nih.gov/assembly/GCF\\_000001405.13/](http://www.ncbi.nlm.nih.gov/assembly/GCF_000001405.13/)). Genomic variation within modern humans  
426 (MH) came from 1000 Genomes Project (1KGP), Phase 3 from Auton et al. [87]. All MH genomes were  
427 selected randomly from each subpopulation with a filter for females only to facilitate comparisons of the  
428 X chromosome. The 1KGP individuals used are listed in Table S1. Archaic genomes are from Prüfer  
429 et al. [1] (Altai), Prüfer et al. [2] (Vindija), Mafessoni et al. [3] (Chagyrskaya), and Meyer et al. [4]  
430 (Denisova).  
431

#### 432 Building individual genomes

433 We constructed full-length genomes for each MH or AH based upon the genotyping information in their  
434 respective vcf file. Given the difficulty of distinguishing heterozygous genotypes in the ancient DNA  
435 samples, we treated all individuals as if they were homozygous (pseudo-haploid). We built each individual  
436 genome using GATK's FastaAlternateReferenceMaker tool [95]. If an individual had an alternate allele  
437 (homozygous or heterozygous), we inserted it into the reference genome to create a pseudo-haploid, or  
438 "flattened" genome for each individual. This procedure is illustrated in step 1 of Fig. S1.

#### 439 Accounting for missing data in the archaic genomes

440 Ancient DNA is both fragmented and degraded. These characteristics present challenges to both se-  
441 quencing and alignment, resulting in gaps in coverage, particularly in genomic regions of low complexity.  
442 To account for this missing data, we "masked" all genomic regions lacking archaic genotyping information  
443 by reverting nucleotide states to the hg19 reference. For analyses that compared 3D genome organization  
444 between MHs and AHs, we masked both MH and AH genomes. This procedure is illustrated in steps 2-4  
445 of Fig. S1. Archaic genome coverage is shown in Fig. S2. For analyses that only considered MHs (e.g.  
446 quantifying 3D genome variability across the genome in MHs), this masking procedure was not applied.

### 447 5.2 3D genome organization predictions with Akita

448 After the genomes were prepared, we input them into Akita for predictions using a 1 Mb sliding window  
449 (1,048,576 bp) overlapping by half (e.g. 524,288-1,572,864, 1,048,576-2,097,152, 1,572,864-2,621,440).  
450 Although Akita is trained simultaneously on Hi-C and Micro-C across five cell types in a multi-task  
451 framework to achieve greater accuracy, we focus on predictions in the highest resolution maps, human  
452 foreskin fibroblast (HFF). We note that the results are similar when considering other cell types (e.g.  
453 embryonic stem cells), likely because of limited cell-type-specific differences (Fig. S5). Akita considers  
454 the full window to generate predictions, but the resulting predictions are generated for only the middle  
455 917,504 bp. Each contact map is a prediction for a single individual, and each cell represents physical  
456 3D contacts at approximately 2 kb (2,048 bp) resolution. The value in each cell is  $\log_2(obs/exp)$ -  
457 scaled to account for the distance-dependent nature of chromatin contacts. Darker red pixels indicate  
458 more physical contacts and darker blue pixels denote fewer physical contacts. For all analyses, we only

459 considered windows with full (100%) coverage in the hg19 reference genome for a total of 4749 autosomal  
460 and 250 chromosome X windows. Fudenberg et al. [82] provides further details on the CNN architecture  
461 and training data used.

### 462 **5.3 3D genome comparisons**

463 After predictions were made on all 1 Mb windows for all individuals, we compared the resulting pre-  
464 dictions using a variety of measures. All measures are scaled to indicate divergence: higher indicates  
465 more difference while lower indicates more similarity. In the maintext we transform the Spearman’s rank  
466 correlation coefficient ( $1 - \rho$ ) to describe 3D divergence. We consider measures based on the Pearson  
467 correlation coefficient ( $1 - r$ ) and mean squared difference ( $\frac{1}{n} \sum_{i=1}^n (x_i - y_i)^2$ ) in Fig. S4. Percentiles of 3D  
468 divergence shown in Fig. 2A-B are calculated with reference to a universe of 4 AHs  $\times$  5 African MHs  $\times$   
469 4999 genomic windows for a total of 99,980 comparisons. Figs. 4A,S9 averages the 3D divergence ( $1 - \rho$ )  
470 across all 4999 1 Mb windows (lower triangle) to compare to the average number of bp differences (after  
471 the masking procedure described above) in the same pair of individuals (upper triangle). Clustering is  
472 done with the “complete” (Farthest Point) method.

### 473 **5.4 Sequence comparisons**

474 Some analyses compare 3D genome divergence with sequence divergence. To calculate the sequence  
475 divergence between two individuals, we counted the proportion of bases at which the two individuals  
476 differ in the 1 Mb window. For comparisons of divergence when including AHs, we applied the same  
477 masking procedure as used to facilitate 3D genome comparisons (i.e. windows with missingness in AHs  
478 are filled with hg19 reference).

### 479 **5.5 CTCF motif overlap**

480 We consider how nucleotide differences in a window (between Neanderthal [Vindija] and an African MH  
481 [HG03105]) impacts 3D genome divergence in Figs. 4B,S10. We stratified variants by if they overlap a  
482 bound CTCF motif and their distance to TAD boundaries. CTCF motifs are from Vierstra et al. [96].  
483 CTCF-bound open chromatin candidate cis-regulatory elements (cCREs) in the HFF cell type are from  
484 Abascal et al. [97]. TAD boundaries in the HFF cell type are from processed MicroC data from Akgol  
485 Oksuz et al. [98]. These annotations were all lifted over to hg19 [99]. A window was considered to have  
486 a CTCF-overlapping variant if an AH-MH nucleotide difference intersected a CTCF-bound HFF cCRE  
487 and a CTCF motif. Results were further stratified by varying levels of motif strength (“match\_score” in  
488 the top 10<sup>th</sup>, 25<sup>th</sup>, 50<sup>th</sup>, or any percentile), distance to TAD boundary (within 15 kb, 30 kb, or anywhere),  
489 and whether the CTCF motif overlap occurs in the middle 50% of the 1 Mb window or not.

### 490 **5.6 Empirical distribution of expected 3D genome divergence**

491 To compute the expected 3D divergence in a window given the observed sequence divergence, we generate  
492 genomes with shuffled nucleotide differences. We match these shuffled differences to the same number  
493 and tri-nucleotide context of the observed sequence differences between the Neanderthal (Vindija) and an  
494 African MH (HG03105) genome (Fig. 4C). Variants are not shuffled into masked regions of the genome.  
495 For each 1 Mb window of the genome ( $N = 4999$ ) we generate 100 shuffled sequences. We calculate  
496 an empirical distribution of expected 3D divergence from comparing the contact maps of the shuffled  
497 sequences with the MH sequence. Finally, we compare the average expected 3D divergence from this  
498 distribution to the observed AH-MH 3D divergence.



## 5.7 AH-MH 3D divergent loci

### Identifying loci

To identify loci with AH-MH 3D genome organization divergence, we compared the 3D contact map at each 1 Mb loci between each AH and 20 African MHs. To call a region as divergent, we required all 20 AH-MH comparisons to be more 3D divergent than all MH-MH comparisons (Fig. 3A). This identifies regions with consistent 3D differences between AHs and MHs while excluding regions with a large 3D diversity in modern humans. We also required the minimum AH-MH 3D divergence to be in the 80<sup>th</sup> percentile or greater of most 3D diverged (Fig. 2A, 3D divergence > 0.0042). Because 20 MHs do not capture the full MH genome diversity, it is possible that these criteria would still capture 3D patterns segregating in modern Africans that are not truly AH-MH diverged. Thus, we removed any windows where the 3D-modifying variant determined by *in silico* mutagenesis (below) was observed in 1KGP MHs if it was not introgressed (LD of  $r^2 = 1$  with introgressed variants called by Browning et al. [93] or Vernot et al. [15]). For the counts of AH-MH divergent windows (Fig. 3B), we considered overlapping 1 Mb windows as a single observation. We summarize and report the AH-MH 3D divergent windows in Tables S2,S3 and a larger set of windows based on less conservative criteria in Table S4.

### *In silico* mutagenesis

To identify the variant(s) contributing to the most prominent 3D differences in each identified AH-MH divergent window, *3D-modifying variants*, we use *in silico* mutagenesis. For example, for an Altai Neanderthal divergent window, we identify every bp difference that is unique to the Altai genome when compared to 20 African MH genomes. In the background of the MH (HG03105) genome, we insert each different Altai allele one-at-a-time. We then compare the resulting contact map between the original MH genome and the MH genome with each Altai allele. We then identify both the allele resulting in the largest 3D divergence and any other variants that contribute to a 3D divergence  $\geq 0.0042$  and term these “3D-modifying variants” (Table S2,S5).

### Phenotype ontology enrichment

To test if AH-MH 3D-modifying variants are enriched near genes related to particular phenotypes we follow a procedure visually described in Fig. S7. 3D-modifying variants (above) are linked to genes in their TAD because this provides evidence of physical proximity. TADs are defined as regions between TAD boundaries as defined with MicroC data in HFF from Akgol Oksuz et al. [98] (lifted over to hg19). Genes are defined as the longest transcript from protein-coding genes (NM prefix) from NCBI RefSeq downloaded from the UCSC Table Browser [100]. Genes are linked to phenotypes from the Human Phenotype Ontology (HPO) and GWAS Catalog 2019 downloaded from Enrichr [90–92]. Annotations are further grouped into phenotypic systems via system-level annotations from Gene ORGANizer [101] and manual curation. HPO largely considers rare disease annotations and has 1779 terms with 3,096 genes annotated [88]. The GWAS Catalog largely considers common disease annotations and has 737 terms with 19,378 genes annotated [89]. Through this procedure, we counted the number of ontology terms linked to the set of 3D-modifying variants. We considered 3 different sets, those shared (intersect) by all Neanderthals (Fig. 3), those in any Neanderthal (union), and those in Denisova (Fig. S8, Table S2).

We test enrichment for ontology terms linked to at least one 3D-modifying variant. While the annotations are downloaded from Enrichr, we did enrichment analyses with a more appropriate null. For each set, we shuffle the observed 3D-modifying variants into the background genome. We defined the background genome as any place where a 3D-modifying variant could have been identified (i.e. regions with full coverage in modern humans used for Akita predictions). We then use the same procedure (Fig. S7) to link the shuffled variants to genes and then ontology terms. We repeat this shuffle 500,000 times to create an empirical distribution for how many times we would observe each annotation under the null. We used these distributions to calculate an enrichment and *P*-value for each ontology term. The FDR-corrected significance level was determined empirically using these null observations (a subset

546 of  $n = 50,000$ ). We select the highest p-value threshold that led to a  $V/R < Q$  where  $V$  is the mean  
547 number of expected false discoveries and  $R$  is the observed discoveries (which includes both true and  
548 false positives).

## 549 **5.8 Relationship between 3D genome organization and introgression**

### 550 **3D genome variability**

551 To consider how 3D organization may have constrained where we observe introgression in the genome,  
552 we calculated 3D genome variability across the genome in MHs. Because we are not comparing these  
553 predictions with AH 3D genome organization, we did not mask the genomes before 3D genome predictions  
554 (above). In the same 1 Mb sliding windows across the genome, we predicted the contact maps for 20  
555 modern Africans (because they have no or very little introgression). For each window, we calculate the  
556 3D genome divergence between all 190  $\binom{20}{2}$  pairs of contact maps. We then computed the “3D genome  
557 variability” by taking the mean of these 190 divergences for each 1 Mb window across the genome. High  
558 3D genome variability indicates a high average pairwise 3D divergence (i.e. diversity of 3D organization),  
559 while low 3D genome variability indicates low pairwise 3D divergence (i.e. similar 3D organization across  
560 all individuals).

### 561 **Genomic windows with evidence of introgression**

562 To define genomic regions with Neanderthal ancestry we used “segments” identified by Browning et al.  
563 [93] using Sprime, a heuristic scoring strategy that compares high-LD regions in a target admixed pop-  
564 ulation (i.e., Europeans) with an unadmixed outgroup (i.e., Africans) to identify putatively introgressed  
565 regions. We considered a set of Sprime-identified segments shared (intersection) among East Asians  
566 (EAS), EUR, and SAS. We repeat the analysis using a more stringent subset of Sprime segments that  
567 (1) have at least 30 putatively introgressed variants that could be compared to the Altai Neanderthal  
568 genome and (2) had a match rate of at least 30% to the Altai Neanderthal allele (Neanderthal filter).  
569 We also considered the introgressed Neanderthal haplotypes previously identified by Vernot et al. [15]  
570 identified using the  $S^*$  statistic. Finally, we consider introgressed segments unique to a single population  
571 (EAS, EUR, or SAS). Because these introgression calls only consider autosomes, we do not use the X  
572 chromosome for these analyses. Results from these sets of Neanderthal ancestry are in Figs. 5,S11,S12  
573 and Tables S7,S8.

574 In the main text (Fig. 5), we compare the 3D genome variability between 1 Mb windows with no  
575 introgression (0%) versus windows where at least 70% of the bp have evidence of introgression. Other  
576 thresholds are shown in Fig. S11.

### 577 **Predicting the amount of introgression**

578 To test if 3D genome variability can be uniquely informative to predict tolerance of introgression,  
579 we conducted a simple linear regression. We predict the amount of introgression in a 1 Mb window  
580 while conditioning on the amount of sequence variability in a window.  $Y = B_0 + B_1 X_{3D \text{ variability}} +$   
581  $B_2 X_{\text{Sequence Variability}}$ , where  $Y$  is the proportion of the 1 Mb window with evidence of introgression  
582 defined using the previously described sets of Neanderthal ancestry. For comparison, we also conducted  
583 some regressions where  $Y$  was modeled from only 3D variability or sequence variability alone. Results  
584 from these models are in Figs. 5B,S12, Tables S7,S8.

## 585 **5.9 Individual-level introgression calls**

586 We used introgression calls in 1KGP individuals from Chen et al. [94], which applied IBDmix with the  
587 Altai Neanderthal genome to identify introgressed segments in MHs. We identified windows with AH-MH  
588 divergence with evidence of introgression by intersecting with the introgression calls.

589 We also test the relationship between the amount of introgression an individual has and their 3D  
590 divergence from AHs. For each window, we compare the amount of introgression (% of bp) for an  
591 individual in a 1 Mb window with that individual’s 3D divergence from Neanderthals. We do this  
592 analysis for 15 Eurasians across 4,749 1 Mb autosomal windows (total  $n = 71,235$ ). In Fig. 6C we  
593 compare Eurasians to the Vindija Neanderthal 3D genome and in Fig. S14 we compare to Altai and  
594 Chagyrskaya. We also repeat the analysis removing windows with no evidence (0% bp) of introgression.

## 595 5.10 eQTL and PheWAS analysis

596 eQTL analysis and plots were generated using the Genotype-Tissue Expression (GTEx) Project (V8  
597 release) Portal (lifted over to hg19) [42]. PheWAS results are from the GWAS Atlas and consider 4756  
598 traits [102]. Allele frequencies come from 1KGP Phase 3 [87].

## 599 5.11 Examples

600 The examples visualized in Figs. 3,6 are annotated using the UCSC genome browser [99]. They were each  
601 manually zoomed to highlight the regions of interest. We use ENCODE open chromatin candidate cis-  
602 regulatory elements (cCREs) [97] to highlight promoters (promoter-like signature, pink) and enhancers  
603 (proximal [orange] and distal [yellow] enhancer-like signature) combined from all cell types downloaded  
604 from the UCSC table browser (lifted over to hg19) [100]. We use Transcription Factor (TF) ChIP-seq  
605 Clusters (130 cell types) from ENCODE 3 [103, 104] downloaded from UCSC table browser [100]. We  
606 show the motif sequence logo with reference to the positive strand of hg19.

## 607 5.12 Data analysis and figure generation

608 The datasets we generated are available in the GitHub repository “neanderthal-3d-genome” available  
609 here <https://github.com/emcarthur/neanderthal-3D-genome/> which will be formally cited and  
610 versioned upon publication.

611 All genomic coordinates and analysis refer to Homo sapiens (human) genome assembly GRCh37  
612 (hg19), unless otherwise specified. All  $P$  values are two-tailed, unless otherwise specified. All measures  
613 of central tendencies are means, unless otherwise specified. Data and statistical analyses were conducted  
614 using Python 3.6.10 (Anaconda distribution), Jupyter Notebook, BedTools v2.26, and PLINK 1.9 [105,  
615 106]. Figure generation was significantly aided by Matplotlib, Seaborn, and Inkscape [107–109].

## 616 5.13 Data availability

617 The publicly available data used for analysis are available in the following repositories. MH genome vcfs  
618 are from 1000 Genomes Project (1KGP) ([ftp://1000genomes.ebi.ac.uk/vol1/ftp/data\\_collections/1000\\_genomes\\_project/release/20190312.biallelic\\_SNV\\_and\\_INDEL/](ftp://1000genomes.ebi.ac.uk/vol1/ftp/data_collections/1000_genomes_project/release/20190312.biallelic_SNV_and_INDEL/)) [87]. Archaic genotypes are  
619 from the following repositories: Altai Neanderthal [1] (<ftp://eva.mpg.de/neandertal/Vindija/VCF/Altai/>), Denisova (<ftp://eva.mpg.de/neandertal/Vindija/VCF/Denisova/>) [4], Vindija Neanderthal  
620 [2] (<ftp://eva.mpg.de/neandertal/Vindija/VCF/Vindija33.19/>), and Chagyrskaya Neanderthal [3]  
621 (<ftp://eva.mpg.de/neandertal/Chagyrskaya/VCF/>). Introgressed variants and segments are from  
622 Sprime Version 1 (<https://data.mendeley.com/datasets/y7hyt83vxx/>) [93]. An alternative set of  
623 introgressed variants and segments are from S\* ([https://drive.google.com/drive/folders/0B9Pc7\\_zItMCVWUp6bWtXc2xJVkk?resourcekey=0-Cj8G4QYndXQLVIGPoWKUjQ](https://drive.google.com/drive/folders/0B9Pc7_zItMCVWUp6bWtXc2xJVkk?resourcekey=0-Cj8G4QYndXQLVIGPoWKUjQ)) [15]. Individual level 1KGP  
624 introgression calls are from the Akey Lab ([https://drive.google.com/drive/folders/1mDQaDFS-j22Eim5\\_y7LAsTTnt5Gwsoow](https://drive.google.com/drive/folders/1mDQaDFS-j22Eim5_y7LAsTTnt5Gwsoow)) [94].  
625  
626  
627  
628

629 CTCF motifs are from genome-wide motif scans v1.0 (<https://resources.altius.org/~jvierstra/projects/motif-clustering/releases/v1.0/>), all models in the CTCF archetype motif cluster,  
630 lifted-over to hg19) [96], CTCF-bound open chromatin candidate cis-regulatory elements (cCREs) in the  
631 HFF cell type (<https://screen.encodeproject.org/> > Downloads > by cell type > HFF-Myc male  
632

633 newborn originated from foreskin fibroblast, lifted-over to hg19)[97], TAD boundaries in the HFF cell  
634 type are from processed MicroC data available at the 4D nucleome data portal (<https://data.4dnucleome.org/experiment-set-replicates/4DNES9X112GZ/>, lifted-over to hg19)[98]. RefSeq genes,  
635 TF ChIP-seq Clusters, enhancer and promoter cCREs are downloaded from the UCSC Table Browser  
636 (<https://genome.ucsc.edu/cgi-bin/hgTables>)[100]. Gene ontology annotations are downloaded  
637 from Enrichr (<https://maayanlab.cloud/Enrichr/#libraries>)[90–92]. System-level groupings of  
638 disease ontology terms were aided by Gene ORGANizer annotations(<http://geneorganizer.huji.ac.il/downloads/>)[101]. eQTL data is from the GTEx Portal (<https://www.gtexportal.org/>, lifted-over  
639 to hg19)[42]. PheWAS results are from the GWAS Atlas (<https://atlas.ctglab.nl/>)[102].

## 642 5.14 Code availability

643 Akita is in the “basenji” GitHub repository available here [https://github.com/calico/basenji/tree](https://github.com/calico/basenji/tree/master/manuscripts/akita)  
644 [/master/manuscripts/akita](https://github.com/calico/basenji/tree/master/manuscripts/akita) [82]. The “neanderthal-3d-genome” GitHub repository (above) contains  
645 a Jupyter notebook with custom code used for data analysis and all figure generation.

## 646 5.15 Acknowledgements

647 The authors would like to thank Colby Tubbs, Mary Lauren Benton, Douglas Ruderfer, Colin Brand,  
648 and other members of the Capra and Pollard labs for helpful discussions and manuscript comments. This  
649 work was conducted in part using the resources of the Advanced Computing Center for Research and  
650 Education (ACCRE) at Vanderbilt University, Nashville, TN.

## 651 5.16 Funding sources

652 This work was supported by the National Institutes of Health (NIH) General Medical Sciences award  
653 R35GM127087 to JAC, NIH National Human Genome Research Institute award F30HG011200 to EM,  
654 and T32GM007347. GF is supported by R35 GM143116-01. The funding bodies had no role in the  
655 design of the study and collection, analysis, or interpretation of data, or in writing the manuscript. The  
656 content is solely the responsibility of the authors and does not necessarily represent the official views of  
657 the NIH.

## 658 5.17 Authors’ contributions

659 EM, DCR, ENG, GF, MP, KK, KSP, JAC conceived and designed the work presented here. EM and DCR  
660 conducted all the analyses. EM, DCR, ENG, GF, KSP, JAC interpreted the results, drafted the work,  
661 and substantively revised the manuscript. EM, DCR, ENG, GF, MP, KK, KSP, JAC have approved the  
662 submitted version and have agreed to be accountable for their contributions.

## 663 5.18 Competing interests

664 The authors declare no competing interests.

## 665 References

- 666 [1] K. Prüfer, F. Racimo, N. Patterson, et al. “The complete genome sequence of a Neanderthal from  
667 the Altai Mountains”. In: *Nature* 505.7481 (2014), pp. 43–49. ISSN: 00280836. DOI: [10.1038/nature12886](https://doi.org/10.1038/nature12886).  
668  
669 [2] K. Prüfer, C. De Filippo, S. Grote, et al. “A high-coverage Neandertal genome from Vindija Cave  
670 in Croatia”. In: *Science* 358.6363 (2017), pp. 655–658. ISSN: 10959203. DOI: [10.1126/science.aao1887](https://doi.org/10.1126/science.aao1887).  
671



- 672 [3] F. Mafessoni, S. Grote, C. D. Filippo, et al. “A high-coverage neandertal genome from chagyrskaya  
673 cave”. In: *Proceedings of the National Academy of Sciences of the United States of America* 117.26  
674 (June 2020), pp. 15132–15136. ISSN: 10916490. DOI: [10.1073/pnas.2004944117](https://doi.org/10.1073/pnas.2004944117).
- 675 [4] M. Meyer, M. Kircher, M. T. Gansauge, et al. “A high-coverage genome sequence from an archaic  
676 Denisovan individual”. In: *Science* 338.6104 (Oct. 2012), pp. 222–226. ISSN: 10959203. DOI: [10.1  
677 126/science.1224344](https://doi.org/10.1126/science.1224344).
- 678 [5] M. Kuhlwilm and C. Boeckx. “A catalog of single nucleotide changes distinguishing modern  
679 humans from archaic hominins”. In: *Scientific Reports* 9.1 (June 2019), pp. 1–14. ISSN: 20452322.  
680 DOI: [10.1038/s41598-019-44877-x](https://doi.org/10.1038/s41598-019-44877-x).
- 681 [6] A. B. Wolf and J. M. Akey. “Outstanding questions in the study of archaic hominin admixture”.  
682 In: *PLoS Genetics* 14.5 (May 2018), e1007349. ISSN: 15537404. DOI: [10.1371/journal.pgen.10  
683 07349](https://doi.org/10.1371/journal.pgen.1007349).
- 684 [7] M. C. King and A. C. Wilson. “Evolution at two levels in humans and chimpanzees”. In: *Science*  
685 188.4184 (1975), pp. 107–116. ISSN: 00368075. DOI: [10.1126/science.1090005](https://doi.org/10.1126/science.1090005).
- 686 [8] G. A. Wray. “The evolutionary significance of cis-regulatory mutations”. In: *Nature Reviews*  
687 *Genetics* 8.3 (Mar. 2007), pp. 206–216. ISSN: 14710056. DOI: [10.1038/nrg2063](https://doi.org/10.1038/nrg2063).
- 688 [9] S. B. Carroll. *Evo-Devo and an Expanding Evolutionary Synthesis: A Genetic Theory of Morpho-  
689 logical Evolution*. 2008. DOI: [10.1016/j.cell.2008.06.030](https://doi.org/10.1016/j.cell.2008.06.030).
- 690 [10] P. J. Wittkopp and G. Kalay. *Cis-regulatory elements: Molecular mechanisms and evolutionary  
691 processes underlying divergence*. 2012. DOI: [10.1038/nrg3095](https://doi.org/10.1038/nrg3095).
- 692 [11] R. C. McCoy, J. Wakefield, and J. M. Akey. “Impacts of Neanderthal-Introgressed Sequences on  
693 the Landscape of Human Gene Expression”. In: *Cell* 168.5 (2017), 916–927.e12. ISSN: 10974172.  
694 DOI: [10.1016/j.cell.2017.01.038](https://doi.org/10.1016/j.cell.2017.01.038).
- 695 [12] M. Dannemann, K. Prüfer, and J. Kelso. “Functional implications of Neandertal introgression in  
696 modern humans”. In: *Genome Biology* 18.1 (Apr. 2017), pp. 1–11. ISSN: 1474760X. DOI: [10.118  
697 6/s13059-017-1181-7](https://doi.org/10.1186/s13059-017-1181-7).
- 698 [13] L. L. Colbran, E. R. Gamazon, D. Zhou, P. Evans, N. J. Cox, and J. A. Capra. “Inferred divergent  
699 gene regulation in archaic hominins reveals potential phenotypic differences”. In: *Nature Ecology  
700 and Evolution* 3.11 (2019), pp. 1598–1606. ISSN: 2397334X. DOI: [10.1038/s41559-019-0996-x](https://doi.org/10.1038/s41559-019-0996-x).
- 701 [14] M. Silvert, L. Quintana-Murci, and M. Rotival. “Impact and Evolutionary Determinants of Ne-  
702 anderthal Introgression on Transcriptional and Post-Transcriptional Regulation”. In: *American  
703 Journal of Human Genetics* 104.6 (June 2019), pp. 1241–1250. ISSN: 15376605. DOI: [10.1016/j  
704 .ajhg.2019.04.016](https://doi.org/10.1016/j.ajhg.2019.04.016).
- 705 [15] B. Vernot, S. Tucci, J. Kelso, et al. “Excavating Neandertal and Denisovan DNA from the genomes  
706 of Melanesian individuals”. In: *Science* 352.6282 (2016), pp. 235–239. ISSN: 10959203. DOI: [10.1  
707 126/science.aad9416](https://doi.org/10.1126/science.aad9416).
- 708 [16] S. Sankararaman, S. Mallick, N. Patterson, and D. Reich. “The Combined Landscape of Deniso-  
709 van and Neanderthal Ancestry in Present-Day Humans”. In: *Current Biology* 26.9 (May 2016),  
710 pp. 1241–1247. ISSN: 09609822. DOI: [10.1016/j.cub.2016.03.037](https://doi.org/10.1016/j.cub.2016.03.037).
- 711 [17] M. Dannemann and J. Kelso. “The Contribution of Neanderthals to Phenotypic Variation in  
712 Modern Humans”. In: *American Journal of Human Genetics* 101.4 (2017), pp. 578–589. ISSN:  
713 15376605. DOI: [10.1016/j.ajhg.2017.09.010](https://doi.org/10.1016/j.ajhg.2017.09.010).
- 714 [18] C. N. Simonti, B. Vernot, L. Bastarache, et al. “The phenotypic legacy of admixture between  
715 modern humans and Neandertals”. In: *Science* 351.6274 (Feb. 2016), pp. 737–741. ISSN: 10959203.  
716 DOI: [10.1126/science.aad2149](https://doi.org/10.1126/science.aad2149).
- 717 [19] E. McArthur, D. C. Rinker, and J. A. Capra. “Quantifying the contribution of Neanderthal  
718 introgression to the heritability of complex traits”. In: *Nature Communications* 12.1 (July 2021),  
719 p. 2020.06.08.140087. ISSN: 20411723. DOI: [10.1038/s41467-021-24582-y](https://doi.org/10.1038/s41467-021-24582-y).
- 720 [20] M. Dannemann. “The Population-Specific Impact of Neandertal Introgression on Human Disease”.  
721 In: *Genome biology and evolution* 13.1 (Jan. 2021). ISSN: 17596653. DOI: [10.1093/gbe/evaa250](https://doi.org/10.1093/gbe/evaa250).
- 722 [21] D. Koller, F. R. Wendt, G. A. Pathak, A. D. Lillo, and F. De. “The impact of evolution-  
723 ary processes in shaping the genetics of complex traits in East Asia and Europe : a specific  
724 contribution from Denisovan and Neanderthal introgression”. In: *bioRxiv* 1.203 (Aug. 2021),  
725 p. 2021.08.12.456138. DOI: [10.1101/2021.08.12.456138](https://doi.org/10.1101/2021.08.12.456138).

- 726 [22] L. Abi-Rached, M. J. Jobin, S. Kulkarni, et al. “The shaping of modern human immune systems  
727 by multiregional admixture with archaic humans”. In: *Science* 334.6052 (2011), pp. 89–94. ISSN:  
728 10959203. DOI: [10.1126/science.1209202](https://doi.org/10.1126/science.1209202).
- 729 [23] F. L. Mendez, J. C. Watkins, and M. F. Hammer. “A haplotype at STAT2 introgressed from  
730 neanderthals and serves as a candidate of positive selection in Papua New Guinea”. In: *American  
731 Journal of Human Genetics* 91.2 (2012), pp. 265–274. ISSN: 00029297. DOI: [10.1016/j.ajhg.20  
732 12.06.015](https://doi.org/10.1016/j.ajhg.2012.06.015).
- 733 [24] A. J. Sams, A. Dumaine, Y. Nédélec, V. Yotova, C. Alfieri, J. E. Tanner, P. W. Messer, and  
734 L. B. Barreiro. *Adaptively introgressed Neandertal haplotype at the OAS locus functionally impacts  
735 innate immune responses in humans*. 2016. DOI: [10.1186/s13059-016-1098-6](https://doi.org/10.1186/s13059-016-1098-6).
- 736 [25] M. Dannemann, A. M. Andrés, and J. Kelso. “Introgression of Neandertal- and Denisovan-like  
737 Haplotypes Contributes to Adaptive Variation in Human Toll-like Receptors”. In: *American Jour-  
738 nal of Human Genetics* 98.1 (2016), pp. 22–33. ISSN: 15376605. DOI: [10.1016/j.ajhg.2015.11  
739 .015](https://doi.org/10.1016/j.ajhg.2015.11.015).
- 740 [26] M. Deschamps, G. Laval, M. Fagny, Y. Itan, L. Abel, J. L. Casanova, E. Patin, and L. Quintana-  
741 Murci. “Genomic Signatures of Selective Pressures and Introgression from Archaic Hominins at  
742 Human Innate Immunity Genes”. In: *American Journal of Human Genetics* 98.1 (2016), pp. 5–21.  
743 ISSN: 15376605. DOI: [10.1016/j.ajhg.2015.11.014](https://doi.org/10.1016/j.ajhg.2015.11.014).
- 744 [27] H. Quach, M. Rotival, J. Pothlichet, et al. “Genetic Adaptation and Neandertal Admixture Shaped  
745 the Immune System of Human Populations”. In: *Cell* 167.3 (2016), 643–656.e17. ISSN: 10974172.  
746 DOI: [10.1016/j.cell.2016.09.024](https://doi.org/10.1016/j.cell.2016.09.024).
- 747 [28] Y. Nédélec, J. Sanz, G. Baharian, et al. “Genetic Ancestry and Natural Selection Drive Popula-  
748 tion Differences in Immune Responses to Pathogens”. In: *Cell* 167.3 (2016), 657–669.e21. ISSN:  
749 10974172. DOI: [10.1016/j.cell.2016.09.025](https://doi.org/10.1016/j.cell.2016.09.025).
- 750 [29] D. Enard and D. A. Petrov. “Evidence that RNA Viruses Drove Adaptive Introgression between  
751 Neanderthals and Modern Humans”. In: *Cell* 175.2 (2018), 360–371.e13. ISSN: 10974172. DOI:  
752 [10.1016/j.cell.2018.08.034](https://doi.org/10.1016/j.cell.2018.08.034).
- 753 [30] B. Vernot and J. M. Akey. “Resurrecting surviving Neandertal lineages from modern human  
754 genomes”. In: *Science* 343.6174 (2014), pp. 1017–1021. ISSN: 10959203. DOI: [10.1126/science.1  
755 245938](https://doi.org/10.1126/science.1245938).
- 756 [31] S. Sankararaman, S. Mallick, M. Dannemann, K. Prüfer, J. Kelso, S. Pääbo, N. Patterson, and  
757 D. Reich. “The genomic landscape of Neandertal ancestry in present-day humans”. In: *Nature*  
758 507.7492 (2014), pp. 354–357. ISSN: 14764687. DOI: [10.1038/nature12961](https://doi.org/10.1038/nature12961).
- 759 [32] Q. Ding, Y. Hu, S. Xu, J. Wang, and L. Jin. “Neandertal introgression at chromosome 3p21.31  
760 was under positive natural selection in east asians”. In: *Molecular Biology and Evolution* 31.3  
761 (2014), pp. 683–695. ISSN: 15371719. DOI: [10.1093/molbev/mst260](https://doi.org/10.1093/molbev/mst260).
- 762 [33] F. Racimo, D. Marnetto, and E. Huerta-Sánchez. “Signatures of archaic adaptive introgression in  
763 present-day human populations”. In: *Molecular Biology and Evolution* 34.2 (2017), pp. 296–317.  
764 ISSN: 15371719. DOI: [10.1093/molbev/msw216](https://doi.org/10.1093/molbev/msw216).
- 765 [34] F. Racimo, D. Gokhman, M. Fumagalli, A. Ko, T. Hansen, I. Moltke, A. Albrechtsen, L. Carmel, E.  
766 Huerta-Sanchez, and R. Nielsen. “Archaic adaptive introgression in TBX15/WARS2”. In: *Molec-  
767 ular Biology and Evolution* 34.3 (2017), pp. 509–524. ISSN: 15371719. DOI: [10.1093/molbev/msw  
768 283](https://doi.org/10.1093/molbev/msw283).
- 769 [35] E. E. Khrameeva, K. Bozek, L. He, et al. “Neandertal ancestry drives evolution of lipid catabolism  
770 in contemporary Europeans”. In: *Nature Communications* 5 (2014). ISSN: 20411723. DOI: [10.103  
771 8/ncomms4584](https://doi.org/10.1038/ncomms4584).
- 772 [36] A. Gouy, L. Excoffier, and R. Nielsen. “Polygenic Patterns of Adaptive Introgression in Modern  
773 Humans Are Mainly Shaped by Response to Pathogens”. In: *Molecular Biology and Evolution*  
774 37.5 (May 2020), pp. 1420–1433. ISSN: 15371719. DOI: [10.1093/molbev/msz306](https://doi.org/10.1093/molbev/msz306).
- 775 [37] E. Huerta-Sánchez, X. Jin, Asan, et al. “Altitude adaptation in Tibetans caused by introgression  
776 of Denisovan-like DNA”. In: *Nature* 512.7513 (2014), pp. 194–197. ISSN: 14764687. DOI: [10.1038  
777 /nature13408](https://doi.org/10.1038/nature13408).

- 778 [38] P. Gunz, A. K. Tilot, K. Wittfeld, et al. “Neandertal Introgression Sheds Light on Modern Human  
779 Endocranial Globularity”. In: *Current Biology* 29.1 (Jan. 2019), 120–127.e5. ISSN: 09609822. DOI:  
780 [10.1016/j.cub.2018.10.065](https://doi.org/10.1016/j.cub.2018.10.065).
- 781 [39] M. Hajdinjak, F. Mafessoni, L. Skov, et al. “Initial Upper Palaeolithic humans in Europe had  
782 recent Neanderthal ancestry”. In: *Nature* 592.7853 (Apr. 2021), pp. 253–257. ISSN: 14764687. DOI:  
783 [10.1038/s41586-021-03335-3](https://doi.org/10.1038/s41586-021-03335-3).
- 784 [40] M. Petr, S. Pääbo, J. Kelso, and B. Vernot. “Limits of long-term selection against Neandertal in-  
785 trogression”. In: *Proceedings of the National Academy of Sciences of the United States of America*  
786 116.5 (Jan. 2019), pp. 1639–1644. ISSN: 10916490. DOI: [10.1073/pnas.1814338116](https://doi.org/10.1073/pnas.1814338116).
- 787 [41] N. Telis, R. Aguilar, and K. Harris. “Selection against archaic hominin genetic variation in regula-  
788 tory regions”. In: *Nature Ecology and Evolution* 4.11 (Aug. 2020), pp. 1558–1566. ISSN: 2397334X.  
789 DOI: [10.1038/s41559-020-01284-0](https://doi.org/10.1038/s41559-020-01284-0).
- 790 [42] J. Lonsdale, J. Thomas, M. Salvatore, et al. “The Genotype-Tissue Expression (GTEx) project”.  
791 In: *Nature Genetics* 45.6 (June 2013), pp. 580–585. ISSN: 10614036. DOI: [10.1038/ng.2653](https://doi.org/10.1038/ng.2653).
- 792 [43] D. Gokhman, E. Lavi, K. Prüfer, M. F. Fraga, J. A. Riancho, J. Kelso, S. Pääbo, E. Meshorer, and  
793 L. Carmel. “Reconstructing the DNA methylation maps of the neandertal and the Denisovan”.  
794 In: *Science* 344.6183 (May 2014), pp. 523–527. ISSN: 10959203. DOI: [10.1126/science.1250368](https://doi.org/10.1126/science.1250368).
- 795 [44] D. Batyrev, E. Lapid, L. Carmel, and E. Meshorer. “Predicted Archaic 3D Genome Organization  
796 Reveals Genes Related to Head and Spinal Cord Separating Modern from Archaic Humans”. In:  
797 *Cells* 9.1 (Dec. 2019). ISSN: 20734409. DOI: [10.3390/cells9010048](https://doi.org/10.3390/cells9010048).
- 798 [45] T. Cremer and C. Cremer. *Chromosome territories, nuclear architecture and gene regulation in*  
799 *mammalian cells*. 2001. DOI: [10.1038/35066075](https://doi.org/10.1038/35066075).
- 800 [46] G. Cavalli and T. Misteli. *Functional implications of genome topology*. 2013. DOI: [10.1038/nsmb](https://doi.org/10.1038/nsmb)  
801 [.2474](https://doi.org/10.1038/nsmb.2474).
- 802 [47] G. Duggal, H. Wang, and C. Kingsford. “Higher-order chromatin domains link eQTLs with the  
803 expression of far-away genes”. In: *Nucleic Acids Research* 42.1 (2014), pp. 87–96. ISSN: 03051048.  
804 DOI: [10.1093/nar/gkt857](https://doi.org/10.1093/nar/gkt857).
- 805 [48] F. L. Le Dily, D. Baù, A. Pohl, et al. “Distinct structural transitions of chromatin topological do-  
806 mains correlate with coordinated hormone-induced gene regulation”. In: *Genes and Development*  
807 28.19 (2014), pp. 2151–2162. ISSN: 15495477. DOI: [10.1101/gad.241422.114](https://doi.org/10.1101/gad.241422.114).
- 808 [49] J. A. Beagan and J. E. Phillips-Cremins. “On the existence and functionality of topologically  
809 associating domains”. In: *Nature Genetics* 52.1 (Jan. 2020), pp. 8–16. ISSN: 15461718. DOI: [10.1](https://doi.org/10.1038/s41588-019-0561-1)  
810 [038/s41588-019-0561-1](https://doi.org/10.1038/s41588-019-0561-1).
- 811 [50] T.-H. S. Hsieh, C. Cattoglio, E. Slobodyanyuk, A. S. Hansen, X. Darzacq, and R. Tjian. “Enhancer-  
812 promoter interactions and transcription are maintained upon acute loss of CTCF, cohesin, WAPL,  
813 and YY1”. In: *bioRxiv* (July 2021), p. 2021.07.14.452365. DOI: [10.1101/2021.07.14.452365](https://doi.org/10.1101/2021.07.14.452365).
- 814 [51] B. Baur, J. Schreiber, J. Shin, S. Zhang, Y. Zhang, M. Manjunath, J. S. Song, W. S. Noble,  
815 and S. Roy. “Leveraging epigenomes and three-dimensional genome organization for interpreting  
816 regulatory variation”. In: *bioRxiv* (Aug. 2021), p. 2021.08.29.458098. DOI: [10.1101/2021.08.29](https://doi.org/10.1101/2021.08.29)  
817 [.458098](https://doi.org/10.1101/2021.08.29).
- 818 [52] P. J. Batut, X. Y. Bing, Z. Sisco, J. Raimundo, M. Levo, and M. S. Levine. “Genome organization  
819 controls transcriptional dynamics during development.” In: *Science (New York, N.Y.)* 375.6580  
820 (Feb. 2022), pp. 566–570. ISSN: 1095-9203. DOI: [10.1126/science.abi7178](https://doi.org/10.1126/science.abi7178).
- 821 [53] G. Fudenberg, G. Getz, M. Meyerson, and L. A. Mirny. “High order chromatin architecture shapes  
822 the landscape of chromosomal alterations in cancer”. In: *Nature Biotechnology* 29.12 (2011),  
823 pp. 1109–1113. ISSN: 10870156. DOI: [10.1038/nbt.2049](https://doi.org/10.1038/nbt.2049).
- 824 [54] D. Hnisz, A. S. Weintraub, D. S. Day, et al. “Activation of proto-oncogenes by disruption of  
825 chromosome neighborhoods”. In: *Science* 351.6280 (2016), pp. 1454–1458. ISSN: 10959203. DOI:  
826 [10.1126/science.aad9024](https://doi.org/10.1126/science.aad9024).
- 827 [55] K. J. Meaburn, P. R. Gudla, S. Khan, S. J. Lockett, and T. Misteli. “Disease-specific gene reposi-  
828 tioning in breast cancer”. In: *Journal of Cell Biology* 187.6 (2009), pp. 801–812. ISSN: 00219525.  
829 DOI: [10.1083/jcb.200909127](https://doi.org/10.1083/jcb.200909127).

- 830 [56] T. Misteli. *Higher-order genome organization in human disease*. 2010. DOI: [10.1101/cshperspect.a000794](https://doi.org/10.1101/cshperspect.a000794).  
831
- 832 [57] B. Bonev, N. Mendelson Cohen, Q. Szabo, et al. “Multiscale 3D Genome Rewiring during Mouse  
833 Neural Development”. In: *Cell* 171.3 (Oct. 2017), 557–572.e24. ISSN: 10974172. DOI: [10.1016/j  
834 .cell.2017.09.043](https://doi.org/10.1016/j.cell.2017.09.043).
- 835 [58] S. E. de Bruijn, A. Fiorentino, D. Ottaviani, et al. “Structural Variants Create New Topological-  
836 Associated Domains and Ectopic Retinal Enhancer-Gene Contact in Dominant Retinitis Pigmen-  
837 tosa”. In: *American Journal of Human Genetics* 107.5 (Oct. 2020), pp. 802–814. ISSN: 15376605.  
838 DOI: [10.1016/j.ajhg.2020.09.002](https://doi.org/10.1016/j.ajhg.2020.09.002).
- 839 [59] B. D. Pope, T. Ryba, V. Dileep, et al. “Topologically associating domains are stable units of  
840 replication-timing regulation”. In: *Nature* 515.7527 (Nov. 2014), pp. 402–405. ISSN: 14764687.  
841 DOI: [10.1038/nature13986](https://doi.org/10.1038/nature13986).
- 842 [60] J. Dekker, K. Rippe, M. Dekker, and N. Kleckner. “Capturing chromosome conformation”. In:  
843 *Science* 295.5558 (2002), pp. 1306–1311. ISSN: 00368075. DOI: [10.1126/science.1067799](https://doi.org/10.1126/science.1067799).
- 844 [61] E. Lieberman-Aiden, N. L. Van Berkum, L. Williams, et al. “Comprehensive mapping of long-  
845 range interactions reveals folding principles of the human genome”. In: *Science* 326.5950 (Oct.  
846 2009), pp. 289–293. ISSN: 00368075. DOI: [10.1126/science.1181369](https://doi.org/10.1126/science.1181369).
- 847 [62] J. R. Dixon, D. U. Gorkin, and B. Ren. “Chromatin Domains: The Unit of Chromosome Organi-  
848 zation”. In: *Molecular Cell* 62.5 (June 2016), pp. 668–680. ISSN: 10974164. DOI: [10.1016/j.molc  
849 el.2016.05.018](https://doi.org/10.1016/j.molcel.2016.05.018).
- 850 [63] N. Krietenstein, S. Abraham, S. V. Venev, et al. “Ultrastructural Details of Mammalian Chro-  
851 mosome Architecture”. In: *Molecular Cell* 78.3 (May 2020), 554–565.e7. ISSN: 10974164. DOI:  
852 [10.1016/j.molcel.2020.03.003](https://doi.org/10.1016/j.molcel.2020.03.003).
- 853 [64] T. H. S. Hsieh, C. Cattoglio, E. Slobodyanyuk, A. S. Hansen, O. J. Rando, R. Tjian, and X.  
854 Darzacq. “Resolving the 3D Landscape of Transcription-Linked Mammalian Chromatin Folding”.  
855 In: *Molecular Cell* 78.3 (May 2020), 539–553.e8. ISSN: 10974164. DOI: [10.1016/j.molcel.2020  
856 .03.002](https://doi.org/10.1016/j.molcel.2020.03.002).
- 857 [65] L. Vian, A. Pękowska, S. S. Rao, et al. “The Energetics and Physiological Impact of Cohesin  
858 Extrusion”. In: *Cell* 173.5 (May 2018), 1165–1178.e20. ISSN: 10974172. DOI: [10.1016/j.cell.20  
859 18.03.072](https://doi.org/10.1016/j.cell.2018.03.072).
- 860 [66] G. Fudenberg, M. Imakaev, C. Lu, A. Goloborodko, N. Abdennur, and L. A. Mirny. “Formation  
861 of Chromosomal Domains by Loop Extrusion”. In: *Cell Reports* 15.9 (May 2016), pp. 2038–2049.  
862 ISSN: 22111247. DOI: [10.1016/j.celrep.2016.04.085](https://doi.org/10.1016/j.celrep.2016.04.085).
- 863 [67] K. Kraft, A. Magg, V. Heinrich, et al. “Serial genomic inversions induce tissue-specific architec-  
864 tural stripes, gene misexpression and congenital malformations”. In: *Nature Cell Biology* 21.3  
865 (Feb. 2019), pp. 305–310. ISSN: 14764679. DOI: [10.1038/s41556-019-0273-x](https://doi.org/10.1038/s41556-019-0273-x).
- 866 [68] S. Oh, J. Shao, J. Mitra, et al. “Enhancer release and retargeting activates disease-susceptibility  
867 genes”. In: *Nature* 595.7869 (May 2021), pp. 735–740. ISSN: 14764687. DOI: [10.1038/s41586-02  
868 1-03577-1](https://doi.org/10.1038/s41586-021-03577-1).
- 869 [69] D. G. Lupiáñez, K. Kraft, V. Heinrich, et al. “Disruptions of topological chromatin domains  
870 cause pathogenic rewiring of gene-enhancer interactions”. In: *Cell* 161.5 (May 2015), pp. 1012–  
871 1025. ISSN: 10974172. DOI: [10.1016/j.cell.2015.04.004](https://doi.org/10.1016/j.cell.2015.04.004).
- 872 [70] W. W. Greenwald, H. Li, P. Benaglio, et al. “Subtle changes in chromatin loop contact propensity  
873 are associated with differential gene regulation and expression”. In: *Nature Communications* 10.1  
874 (Dec. 2019), p. 1054. ISSN: 20411723. DOI: [10.1038/s41467-019-08940-5](https://doi.org/10.1038/s41467-019-08940-5).
- 875 [71] M. Spielmann, D. G. Lupiáñez, and S. Mundlos. “Structural variation in the 3D genome”. In:  
876 *Nature Reviews Genetics* 19.7 (July 2018), pp. 453–467. ISSN: 14710064. DOI: [10.1038/s41576-  
877 018-0007-0](https://doi.org/10.1038/s41576-018-0007-0).
- 878 [72] D. U. Gorkin, Y. Qiu, M. Hu, et al. “Common DNA sequence variation influences 3-dimensional  
879 conformation of the human genome”. In: *Genome Biology* 20.1 (Nov. 2019), pp. 1–25. ISSN:  
880 1474760X. DOI: [10.1186/s13059-019-1855-4](https://doi.org/10.1186/s13059-019-1855-4).
- 881 [73] G. Fudenberg and K. S. Pollard. “Chromatin features constrain structural variation across evolu-  
882 tionary timescales”. In: *Proceedings of the National Academy of Sciences of the United States of  
883 America* 116.6 (Feb. 2019), pp. 2175–2180. ISSN: 10916490. DOI: [10.1073/pnas.1808631116](https://doi.org/10.1073/pnas.1808631116).



- 884 [74] E. McArthur and J. A. Capra. “Topologically associating domain boundaries that are stable  
885 across diverse cell types are evolutionarily constrained and enriched for heritability”. In: *American*  
886 *Journal of Human Genetics* 108.2 (Feb. 2021), pp. 269–283. ISSN: 15376605. DOI: [10.1016/j.ajhg.2021.01.001](https://doi.org/10.1016/j.ajhg.2021.01.001).  
887
- 888 [75] Y. Liao, X. Zhang, M. Chakraborty, and J. J. Emerson. “Topologically associating domains and  
889 their role in the evolution of genome structure and function in *Drosophila*”. In: *Genome Research*  
890 31.3 (Mar. 2021), pp. 397–410. ISSN: 15495469. DOI: [10.1101/GR.266130.120](https://doi.org/10.1101/GR.266130.120).
- 891 [76] J. Krefting, M. A. Andrade-Navarro, and J. Ibn-Salem. “Evolutionary stability of topologically  
892 associating domains is associated with conserved gene regulation”. In: *BMC Biology* 16.1 (Dec.  
893 2018), p. 87. ISSN: 17417007. DOI: [10.1186/s12915-018-0556-x](https://doi.org/10.1186/s12915-018-0556-x).
- 894 [77] Y. Yang, Y. Zhang, B. Ren, J. R. Dixon, and J. Ma. “Comparing 3D Genome Organization  
895 in Multiple Species Using Phylo-HMRF”. In: *Cell Systems* 8.6 (June 2019), 494–505.e14. ISSN:  
896 24054720. DOI: [10.1016/j.cels.2019.05.011](https://doi.org/10.1016/j.cels.2019.05.011).
- 897 [78] I. E. Eres, K. Luo, C. J. Hsiao, L. E. Blake, and Y. Gilad. “Reorganization of 3D genome structure  
898 may contribute to gene regulatory evolution in primates”. In: *PLoS Genetics* 15.7 (July 2019).  
899 Ed. by H. S. Malik, e1008278. ISSN: 15537404. DOI: [10.1371/journal.pgen.1008278](https://doi.org/10.1371/journal.pgen.1008278).
- 900 [79] M. J. Rowley and V. G. Corces. “Organizational principles of 3D genome architecture”. In: *Nature*  
901 *Reviews Genetics* 19.12 (Dec. 2018), pp. 789–800. ISSN: 14710064. DOI: [10.1038/s41576-018-0060-8](https://doi.org/10.1038/s41576-018-0060-8).  
902
- 903 [80] L.-H. Chang, S. Ghosh, A. Papale, et al. “A complex CTCF binding code defines TAD boundary  
904 structure and function”. In: *bioRxiv* (Apr. 2021), p. 2021.04.15.440007. DOI: [10.1101/2021.04.15.440007](https://doi.org/10.1101/2021.04.15.440007).  
905
- 906 [81] P. Belokopytova and V. Fishman. “Predicting Genome Architecture: Challenges and Solutions”.  
907 In: *Frontiers in Genetics* 11 (Jan. 2021), p. 1776. ISSN: 16648021. DOI: [10.3389/fgene.2020.617202](https://doi.org/10.3389/fgene.2020.617202).  
908
- 909 [82] G. Fudenberg, D. R. Kelley, and K. S. Pollard. “Predicting 3D genome folding from DNA sequence  
910 with Akita”. In: *Nature Methods* 17.11 (Oct. 2020), pp. 1111–1117. ISSN: 15487105. DOI: [10.1038/s41592-020-0958-x](https://doi.org/10.1038/s41592-020-0958-x).  
911
- 912 [83] R. Schwessinger, M. Gosden, D. Downes, R. C. Brown, A. M. Oudelaar, J. Telenius, Y. W.  
913 Teh, G. Lunter, and J. R. Hughes. “DeepC: predicting 3D genome folding using megabase-scale  
914 transfer learning”. In: *Nature Methods* 17.11 (Oct. 2020), pp. 1118–1124. ISSN: 15487105. DOI:  
915 [10.1038/s41592-020-0960-3](https://doi.org/10.1038/s41592-020-0960-3).
- 916 [84] J. Zhou. “Sequence-based modeling of genome 3D architecture from kilobase to chromosome-  
917 scale”. In: *bioRxiv* (May 2021), p. 2021.05.19.444847. DOI: [10.1101/2021.05.19.444847](https://doi.org/10.1101/2021.05.19.444847).
- 918 [85] J. R. Dixon, S. Selvaraj, F. Yue, A. Kim, Y. Li, Y. Shen, M. Hu, J. S. Liu, and B. Ren. “Topological  
919 domains in mammalian genomes identified by analysis of chromatin interactions”. In: *Nature*  
920 485.7398 (Apr. 2012), pp. 376–380. ISSN: 00280836. DOI: [10.1038/nature11082](https://doi.org/10.1038/nature11082).
- 921 [86] M. Vietri Rudan, C. Barrington, S. Henderson, C. Ernst, D. T. Odom, A. Tanay, and S. Hadjur.  
922 “Comparative Hi-C Reveals that CTCF Underlies Evolution of Chromosomal Domain Architec-  
923 ture”. In: *Cell Reports* 10.8 (Mar. 2015), pp. 1297–1309. ISSN: 22111247. DOI: [10.1016/j.celrep](https://doi.org/10.1016/j.celrep.2015.02.004)  
924 [p.2015.02.004](https://doi.org/10.1016/j.celrep.2015.02.004).
- 925 [87] A. Auton, G. R. Abecasis, D. M. Altshuler, et al. *A global reference for human genetic variation*.  
926 2015. DOI: [10.1038/nature15393](https://doi.org/10.1038/nature15393).
- 927 [88] S. Köhler, M. Gargano, N. Matentzoglou, et al. “The human phenotype ontology in 2021”. In:  
928 *Nucleic Acids Research* 49.D1 (Jan. 2021), pp. D1207–D1217. ISSN: 13624962. DOI: [10.1093/nar](https://doi.org/10.1093/nar/gkaa1043)  
929 [/gkaa1043](https://doi.org/10.1093/nar/gkaa1043).
- 930 [89] A. Buniello, J. A. Macarthur, M. Cerezo, et al. “The NHGRI-EBI GWAS Catalog of published  
931 genome-wide association studies, targeted arrays and summary statistics 2019”. In: *Nucleic Acids*  
932 *Research* 47.D1 (Jan. 2019), pp. D1005–D1012. ISSN: 13624962. DOI: [10.1093/nar/gky1120](https://doi.org/10.1093/nar/gky1120).
- 933 [90] E. Y. Chen, C. M. Tan, Y. Kou, Q. Duan, Z. Wang, G. V. Meirelles, N. R. Clark, and A. Ma’ayan.  
934 “Enrichr: Interactive and collaborative HTML5 gene list enrichment analysis tool”. In: *BMC*  
935 *Bioinformatics* 14.1 (Apr. 2013), pp. 1–14. ISSN: 14712105. DOI: [10.1186/1471-2105-14-128](https://doi.org/10.1186/1471-2105-14-128).



- 936 [91] M. V. Kuleshov, M. R. Jones, A. D. Rouillard, et al. “Enrichr: a comprehensive gene set enrichment  
937 analysis web server 2016 update”. In: *Nucleic acids research* 44.W1 (July 2016), W90–W97. ISSN:  
938 13624962. DOI: [10.1093/nar/gkw377](https://doi.org/10.1093/nar/gkw377).
- 939 [92] Z. Xie, A. Bailey, M. V. Kuleshov, et al. “Gene Set Knowledge Discovery with Enrichr”. In:  
940 *Current Protocols* 1.3 (Mar. 2021), e90. ISSN: 26911299. DOI: [10.1002/cpz1.90](https://doi.org/10.1002/cpz1.90).
- 941 [93] S. R. Browning, B. L. Browning, Y. Zhou, S. Tucci, and J. M. Akey. “Analysis of Human Sequence  
942 Data Reveals Two Pulses of Archaic Denisovan Admixture”. In: *Cell* 173.1 (2018), 53–61.e9. ISSN:  
943 10974172. DOI: [10.1016/j.cell.2018.02.031](https://doi.org/10.1016/j.cell.2018.02.031).
- 944 [94] L. Chen, A. B. Wolf, W. Fu, L. Li, and J. M. Akey. “Identifying and Interpreting Apparent  
945 Neanderthal Ancestry in African Individuals”. In: *Cell* 180.4 (Feb. 2020), 677–687.e16. ISSN:  
946 10974172. DOI: [10.1016/j.cell.2020.01.012](https://doi.org/10.1016/j.cell.2020.01.012).
- 947 [95] G. A. Van der Auwera and B. O’Connor. *Genomics in the cloud : using Docker, GATK, and*  
948 *WDL in Terra*. 2020. ISBN: 1-4919-7518-0.
- 949 [96] J. Vierstra, J. Lazar, R. Sandstrom, et al. “Global reference mapping of human transcription  
950 factor footprints”. In: *Nature* 583.7818 (July 2020), pp. 729–736. ISSN: 14764687. DOI: [10.1038/s41586-020-2528-x](https://doi.org/10.1038/s41586-020-2528-x).
- 951 [97] F. Abascal, R. Acosta, N. J. Addleman, et al. “Expanded encyclopaedias of DNA elements in the  
952 human and mouse genomes”. In: *Nature* 583.7818 (July 2020), pp. 699–710. ISSN: 14764687. DOI:  
953 [10.1038/s41586-020-2493-4](https://doi.org/10.1038/s41586-020-2493-4).
- 954 [98] B. Akgol Oksuz, L. Yang, S. Abraham, et al. “Systematic evaluation of chromosome conformation  
955 capture assays”. In: *Nature Methods* 18.9 (Sept. 2021), pp. 1046–1055. ISSN: 15487105. DOI: [10.1038/s41592-021-01248-7](https://doi.org/10.1038/s41592-021-01248-7).
- 956 [99] W. J. Kent, C. W. Sugnet, T. S. Furey, K. M. Roskin, T. H. Pringle, A. M. Zahler, Haussler,  
957 and David. “The Human Genome Browser at UCSC”. In: *Genome Research* 12.6 (June 2002),  
958 pp. 996–1006. ISSN: 1088-9051. DOI: [10.1101/gr.229102](https://doi.org/10.1101/gr.229102).
- 959 [100] D. Karolchik, A. S. Hinricks, T. S. Furey, K. M. Roskin, C. W. Sugnet, D. Haussler, and W. J.  
960 Kent. “The UCSC table browser data retrieval tool”. In: *Nucleic Acids Research* 32.DATABASE  
961 ISS. (Jan. 2004). ISSN: 03051048. DOI: [10.1093/nar/gkh103](https://doi.org/10.1093/nar/gkh103).
- 962 [101] D. Gokhman, G. Kelman, A. Amartely, G. Gershon, S. Tsur, and L. Carmel. “Gene ORGANizer:  
963 Linking genes to the organs they affect”. In: *Nucleic Acids Research* 45.W1 (July 2017), W138–  
964 W145. ISSN: 13624962. DOI: [10.1093/nar/gkx302](https://doi.org/10.1093/nar/gkx302).
- 965 [102] K. Watanabe, S. Stringer, O. Frei, M. Umičević Mirkov, C. de Leeuw, T. J. Polderman, S. van der  
966 Sluis, O. A. Andreassen, B. M. Neale, and D. Posthuma. “A global overview of pleiotropy and  
967 genetic architecture in complex traits”. In: *Nature Genetics* 51.9 (2019), pp. 1339–1348. ISSN:  
968 15461718. DOI: [10.1038/s41588-019-0481-0](https://doi.org/10.1038/s41588-019-0481-0).
- 969 [103] J. Wang, J. Zhuang, S. Iyer, et al. “Factorbook.org: A Wiki-based database for transcription  
970 factor-binding data generated by the ENCODE consortium”. In: *Nucleic Acids Research* 41.D1  
971 (Jan. 2013), pp. D171–D176. ISSN: 03051048. DOI: [10.1093/nar/gks1221](https://doi.org/10.1093/nar/gks1221).
- 972 [104] J. Wang, J. Zhuang, S. Iyer, et al. “Sequence features and chromatin structure around the genomic  
973 regions bound by 119 human transcription factors”. In: *Genome Research* 22.9 (Sept. 2012),  
974 pp. 1798–1812. ISSN: 10889051. DOI: [10.1101/gr.139105.112](https://doi.org/10.1101/gr.139105.112).
- 975 [105] A. R. Quinlan and I. M. Hall. “BEDTools: A flexible suite of utilities for comparing genomic  
976 features”. In: *Bioinformatics* 26.6 (2010), pp. 841–842. ISSN: 13674803. DOI: [10.1093/bioinform](https://doi.org/10.1093/bioinformatics/btq033)  
977 [atics/btq033](https://doi.org/10.1093/bioinformatics/btq033).
- 978 [106] S. Purcell, B. Neale, K. Todd-Brown, et al. “PLINK: A tool set for whole-genome association and  
979 population-based linkage analyses”. In: *American Journal of Human Genetics* 81.3 (Sept. 2007),  
980 pp. 559–575. ISSN: 00029297. DOI: [10.1086/519795](https://doi.org/10.1086/519795).
- 981 [107] J. D. Hunter. “Matplotlib: A 2D graphics environment”. In: *Computing in Science and Engineer-*  
982 *ing* 9.3 (2007), pp. 90–95. ISSN: 15219615. DOI: [10.1109/MCSE.2007.55](https://doi.org/10.1109/MCSE.2007.55).
- 983 [108] M. Waskom, O. Botvinnik, D. O’Kane, et al. “mwaskom/seaborn: v0.9.0 (July 2018)”. In: (July  
984 2018). DOI: [10.5281/ZENODO.1313201](https://doi.org/10.5281/ZENODO.1313201).
- 985 [109] InkscapeProject. *Inkscape*. 2018.
- 986
- 987

## 6 Supplementary Information

### 6.1 Supplementary Text

When evaluating the relationship between 3D genome variability and introgression (Results section 3.7: “3D genome organization constrained introgression in MHs”), we considered a variety of subsets of genomic windows to fully explore these results. We show that the maintext results (Fig. 5) replicate when using earlier introgressed Neanderthal haplotype predictions from Vernot et al. [15] and other thresholds (Figs. S11, S12). We also find that 3D genome variability is more strongly predictive of introgression shared among all three super-populations than an introgressed sequence unique to a single super-population (Table S7). We hypothesize this is because the maintenance of a haplotype across diverse populations indicates stronger tolerance of the AH 3D organization pattern in diverse human genomic contexts. Additionally, 3D variability is relatively more informative about the amount of introgression when only considering windows of the genome with any introgressed sequence present (Table S8). Thus, we hypothesize that in 1 Mb windows with strong purifying selection against a large-effect introgressed variant (e.g., a deleterious protein-coding variant), 3D genome variability is less relevant. Ultimately, the pressures shaping the landscape of introgression across the genome were multi-factorial, but we demonstrate that 3D genome organization likely played a role.

## 17 6.2 Supplementary Figures

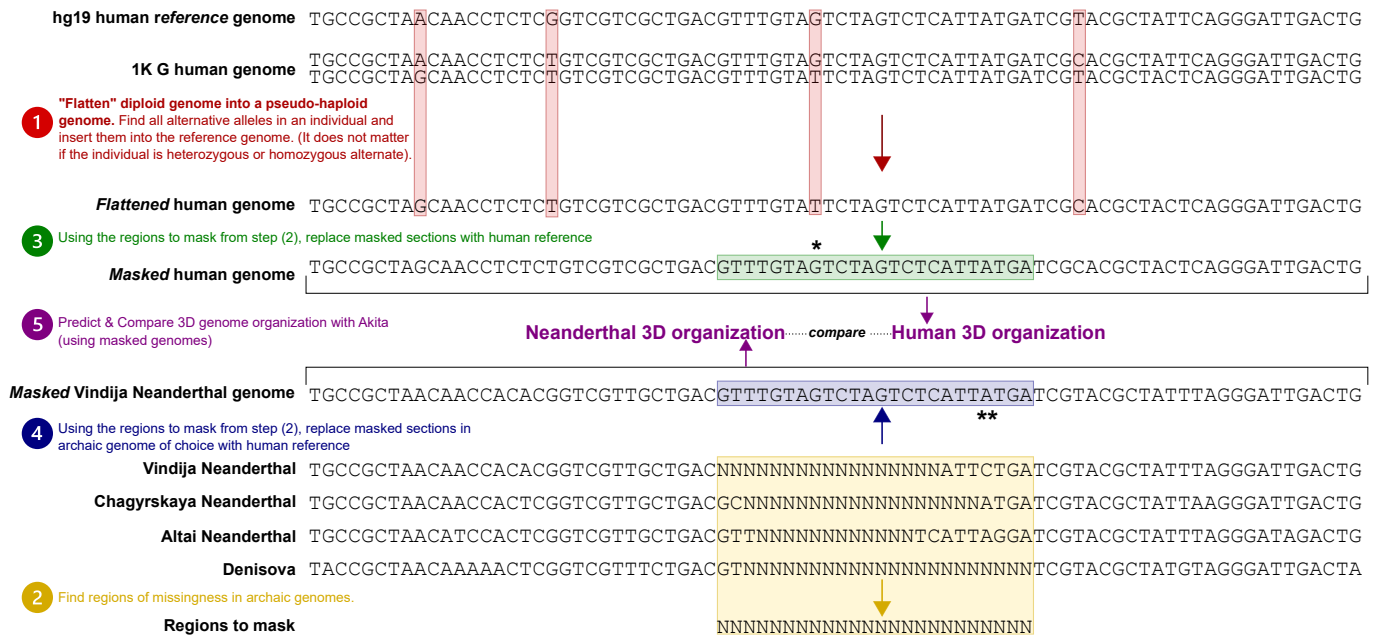

**Figure S1: Handling missingness in the archaic hominin genomes.** We constructed full-length genomes for each MH or AH based upon their genotyping information. Here, we illustrate a schematic of the procedure used to account for the challenges of archaic DNA. (1) Given the difficulty of distinguishing heterozygous genotypes in the ancient DNA samples, we treated all individuals as if they were homozygous (pseudo-haploid). If an individual had an alternate allele (homozygous or heterozygous), we inserted it into the reference genome to create a pseudo-haploid, or “flattened” genome for each individual (highlighted in red boxes). (2) Because of gaps in coverage resulting from the challenges of ancient DNA, particularly in genomic regions of low complexity, we “masked” all genomic regions lacking genotyping information by reverting nucleotide states to the hg19 reference (yellow box). For analyses that compared 3D genome organization between MHs and AHs, and MHs we do this masking procedure for both [3] MHs (green box) and [4] AHs (blue box) to facilitate appropriate comparisons. [5] We run Akita on each processed genome separately and then compare the resulting contact maps. By filling both genomes with the same sequence, there will be no differences between the AH-MH predictions or resulting comparisons. Although AHs and MHs certainly did not have the same genome sequences in these regions of missingness, we preferred this as a conservative approach to minimize identifying regions of interest if there were missing data. For example, we illustrate that at the nucleotide \*, although we observe an MH alternative allele (T), it gets masked and replaced with the hg19 reference (G) because that locus is not comparable to AH genomes. Many of the regions of missingness are shared by all or most of the AHs because those regions are just inherently difficult to sequence (Fig. S2). However, at the nucleotide \*\*, we illustrate another example where an allele observed in the Vindija genome (C) is masked with hg19 reference (A) so that it facilitates comparisons between the AHs (some of which have missingness at that locus).

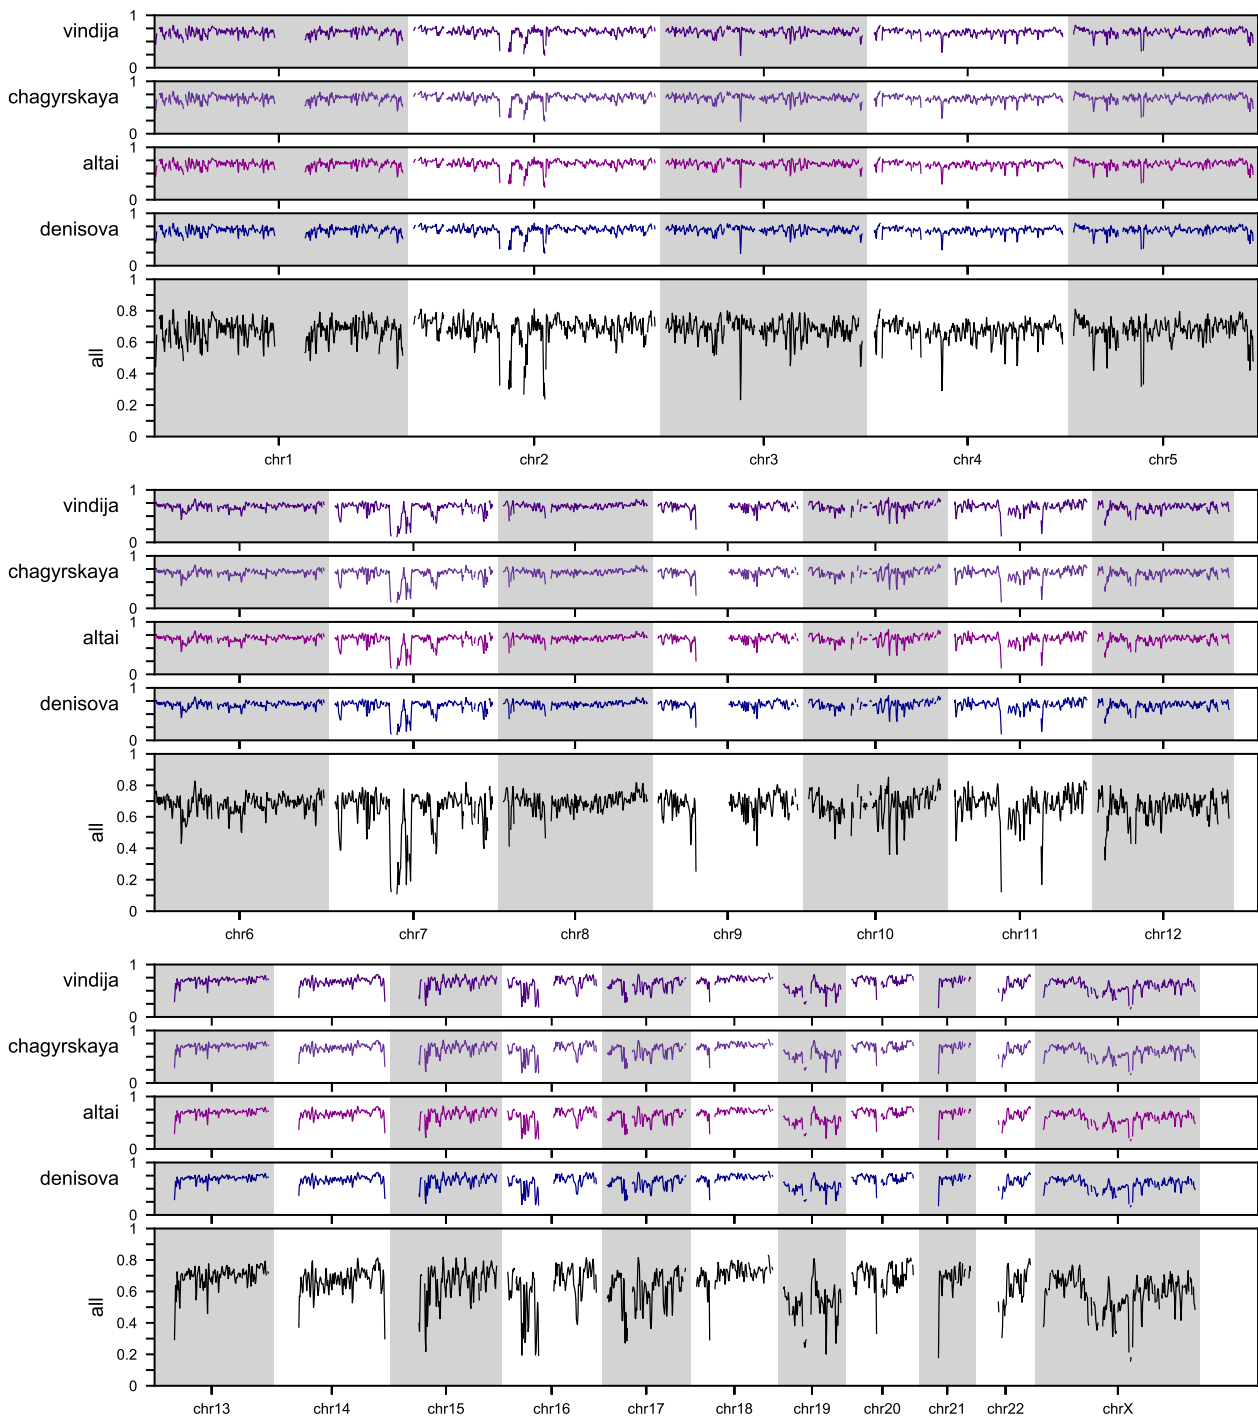

**Figure S2: Archaic hominin sequence coverage across the genome.** Ancient DNA fragmentation and degradation present challenges to both sequencing and alignment resulting in gaps in coverage, particularly in genomic regions of low complexity. Here, we show coverage across the genome for the 4 AHs. The horizontal axis represents genomic loci at the same sliding approximately 1 Mb window resolution ( $N = 4,999$ ) used to do all analyses (Methods). The vertical axis unit is the proportion of bp with coverage (for the 1 Mb window). Bins without full coverage in modern humans (often near centromeres or telomeres) are excluded from all analyses and this figure. The bottom trace (black, labeled “all”) represents the union of the missing segments for all 4 AHs. These regions are masked (Methods, Fig. S1) to facilitate 3D genome and sequence variation comparisons.

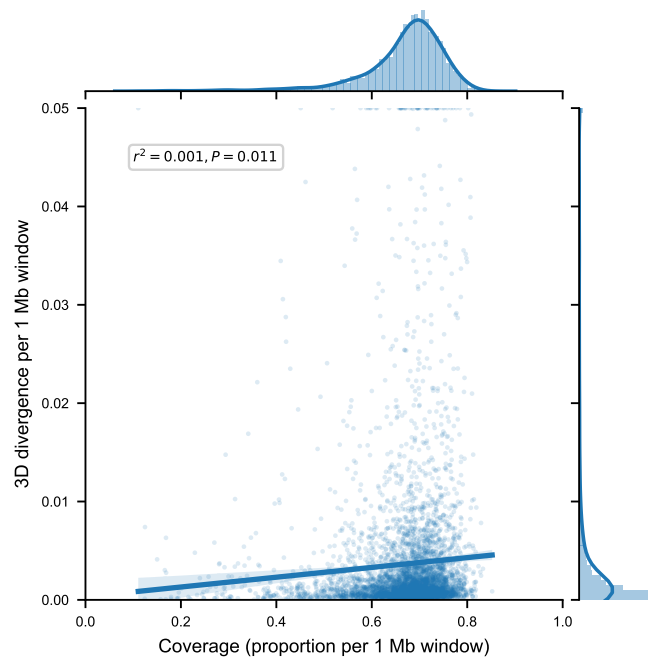

**Figure S3: 3D divergence in 1 Mb genomic window is weakly correlated with coverage.**

Because we mask archaic missingness (Methods, Fig. S1,S2), regions with less coverage have more masking and the resulting processed sequences may have less AH-MH sequence variation. For 1 Mb windows across the genome ( $N = 4999$ ), we compare AH (Vindija Neanderthal) and African MH (HG03105) 3D divergence (vertical axis) with the amount of coverage in that window (horizontal axis). The amount masked is equal to  $1 - \text{coverage}$ . 3D divergence is positively correlated with coverage ( $r^2 = 0.001, P = 0.01$ ). This is likely because there is more opportunity to find variation that results in contact map changes when less of the region is masked; however, this correlation is very weak suggesting that more coverage of the archaic genomes may not uncover many additional examples of divergent organization.



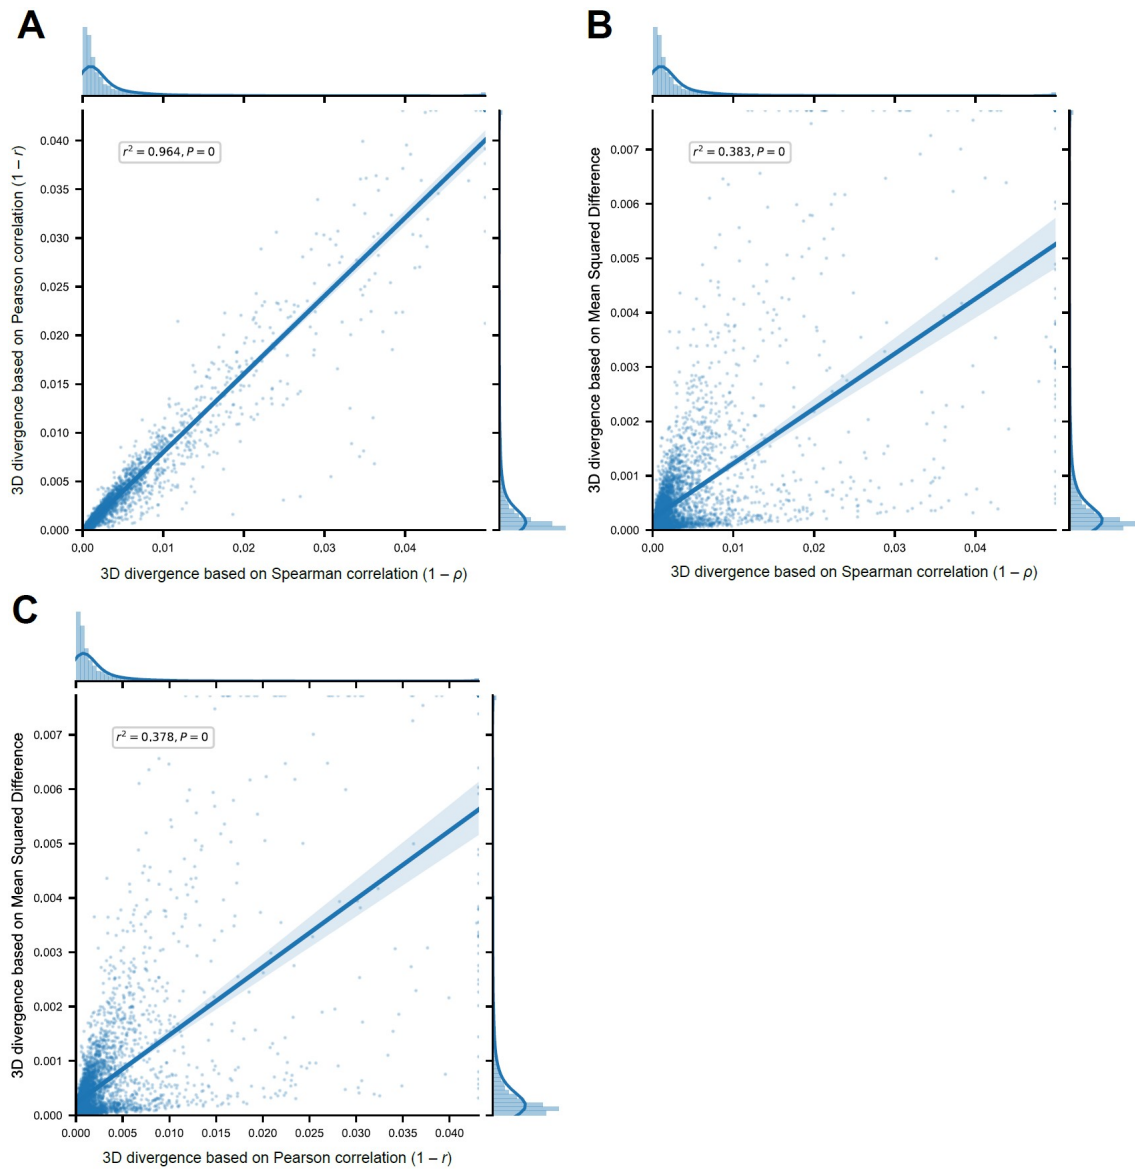

**Figure S4: Alternative measures of contact map comparison correlate with the 3D divergence derived from the Spearman's rank correlation coefficient.** In the main text, we compare chromatin contact maps using a 3D divergence score based on Spearman's rank correlation coefficient ( $1 - \rho$ ). Here, for the same windows across the genome ( $N = 4999$ ), we compare AH (Vindija Neanderthal) and African MH (HG03105) predictions using this Spearman-derived 3D divergence to others based on (A) Pearson's correlation coefficient ( $1 - r$ ) ( $r^2 = 0.964$ ) and (B) mean squared difference ( $\frac{1}{n} \sum_{i=1}^n (x_i - y_i)^2$ ) ( $r^2 = 0.383$ ). We also compare (C) these alternative measures (mean squared difference vs. Pearson's correlation) to each other ( $r^2 = 0.378$ ). The correlations between all measures are highly significant (all  $P < 5 \times 10^{-324}$ ).

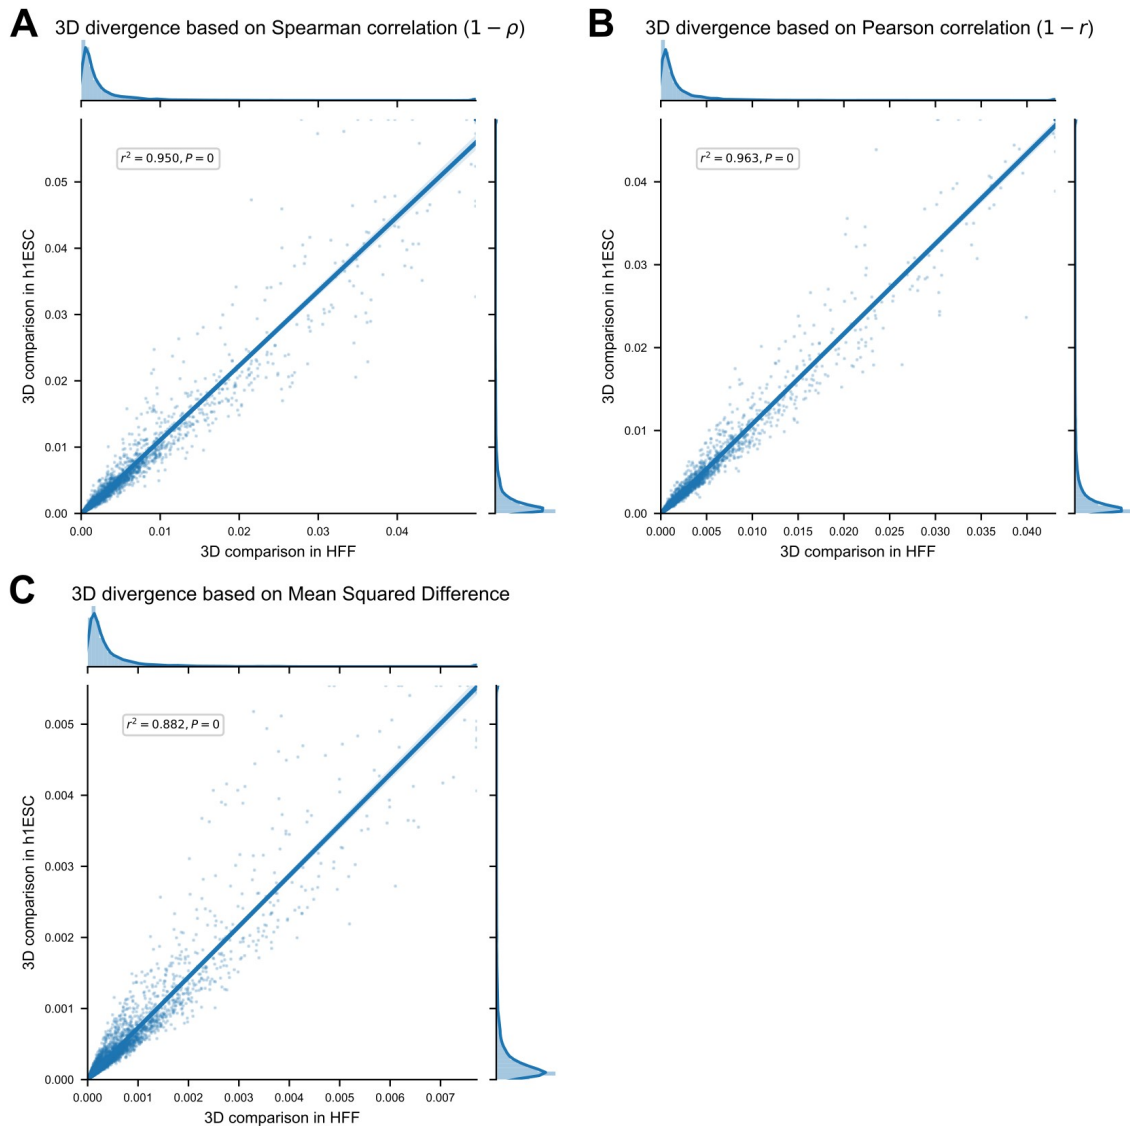

**Figure S5: 3D genome organization comparisons with chromatin contact maps from embryonic stem cell (ESC) are similar to those from human foreskin fibroblast (HFF).** For the same windows across the genome ( $N = 4999$ ), we compare AH (Vindija Neanderthal) and African MH (HG03105) predictions in embryonic stem cell (ESC) (vertical axis) versus human foreskin fibroblast (HFF) (horizontal axis) cell types. The comparisons across cell types are highly correlated regardless of the measure used to quantify their divergence. We consider comparison measures defined using the (A) Spearman correlation ( $r^2 = 0.95$ ), (B) Pearson correlation ( $r^2 = 0.96$ ), and (C) mean squared difference ( $r^2 = 0.88$ ) (all  $P < 5 \times 10^{-324}$ ).

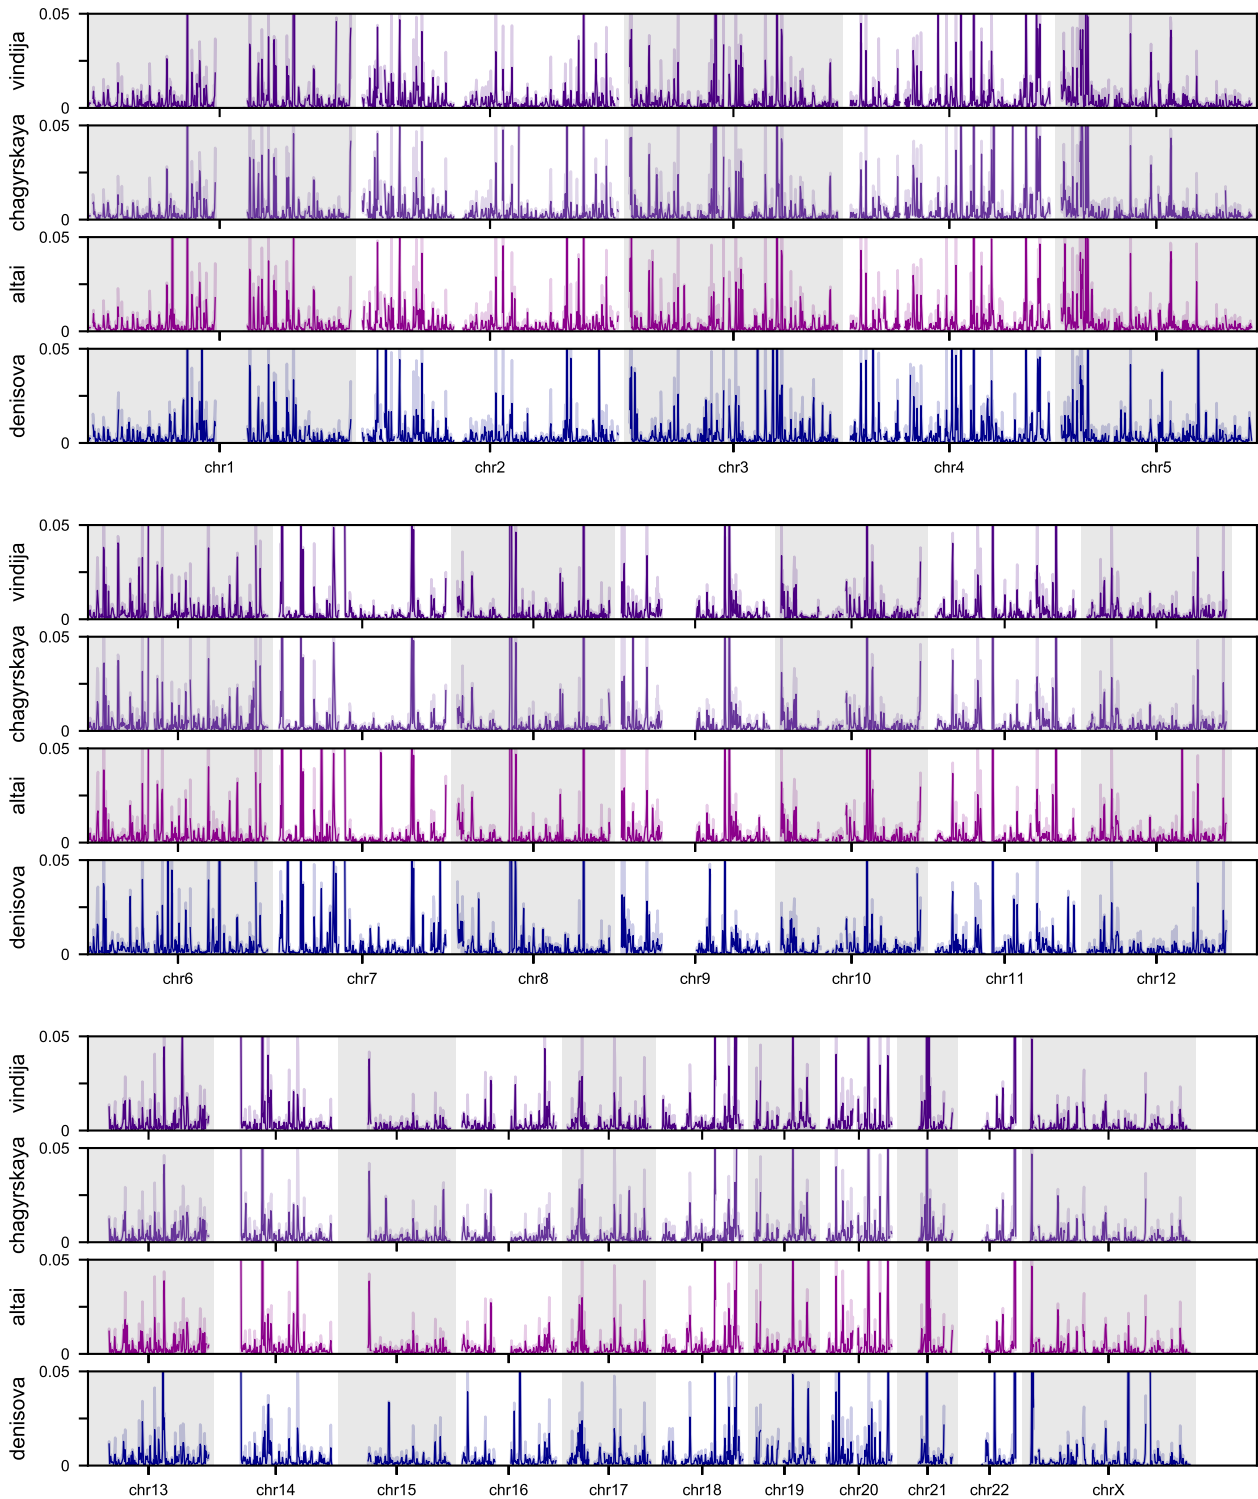

**Figure S6: AH-MH 3D divergence across the whole genome.** Across the genome, we plotted the average divergence of each of the AHs to five modern African individuals from different subpopulations. The horizontal axis represents genomic loci at the same sliding 1 Mb window resolution ( $N = 4,999$ ) used to do all analyses (Methods). This expands Fig. 2C from chr7 to the whole genome. The error band indicates the 95% CI. Comparing the 3D genomes of Neanderthals (purple) or Denisova (blue) with MHs reveals windows of both similarity and divergence (peaks).

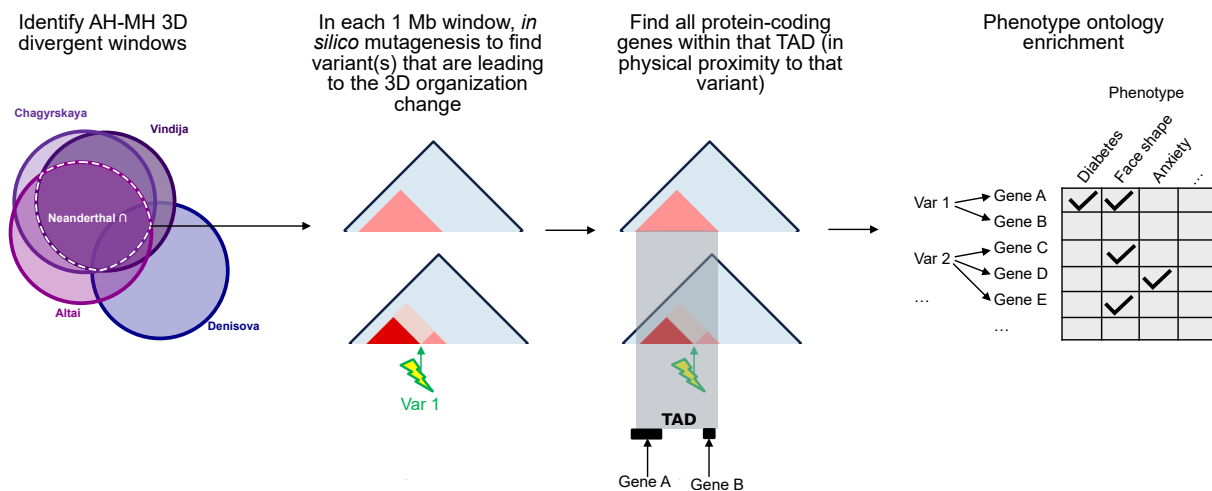

**Figure S7: Method for linking 3D divergent windows to test phenotype ontology term enrichment.** To test if differences in AH-MH 3D organization are enriched near genes related to particular phenotypes we follow a procedure that sequentially links 3D divergent windows to variants to TADs to genes and, ultimately, to phenotypes. We identify AH-MH 3D divergent windows in Fig. 3A–B. We consider three different sets of AH-MH divergent windows, those shared (intersect) by all Neanderthals, those in any Neanderthal (union), and those in Denisova. Results from the set shared by all Neanderthals ( $N = 43$  windows) are shown in the main text (Fig. 3D). In each 1 Mb 3D divergent window, we identify the variant(s) contributing to the most prominent 3D differences using *in silico* mutagenesis (lightning bolt) (Methods). 3D-modifying variants are then linked to protein-coding genes (black bars) in their TAD (gray rectangle) because this provides evidence of physical proximity. Genes are linked to phenotypes from the Human Phenotype Ontology (HPO) and genome-wide association studies (GWAS) Catalog 2019. Through this procedure, we counted the number of ontology terms linked to the set of 3D-modifying variants. We test enrichment for ontology terms linked to at least one 3D-modifying variant using a shuffling approach to create an empirical distribution for how many times we would observe each annotation under the null. We used these distributions to calculate an enrichment and  $P$ -value for each ontology term. The specific data sets used in this procedure are detailed in the Methods. Counts of the number of windows, 3D-modifying variants, genes, and phenotypes for each set are in Table S2. Results for enrichment are in Figs. 3D, S8.

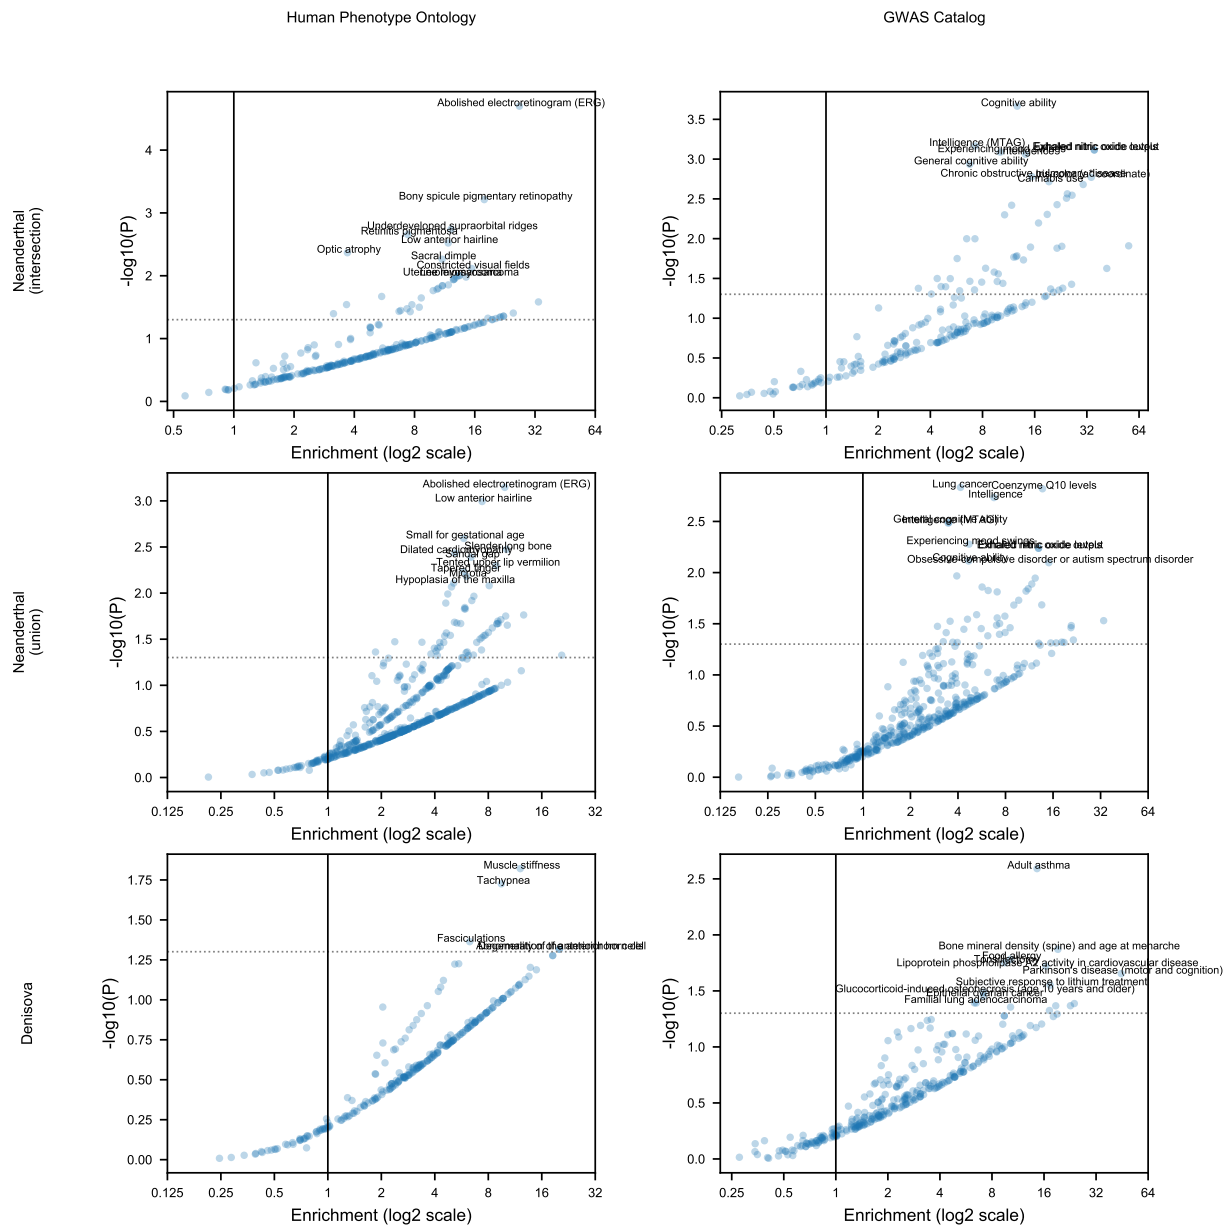

**Figure S8: Phenotype ontology enrichment across other sets of AH-MH 3D divergent windows implicate similar phenotypes.** When testing if differences in AH-MH 3D organization are enriched near genes related to particular phenotypes, we used three different sets of AH-MH 3D divergent windows (rows) and two different sets of gene-phenotype links (columns). The top set is from 43 3D-divergent windows shared by Neanderthals (intersect) (also shown in the main text, Fig. 3D). The middle is from 110 divergent windows in any Neanderthal (union). The bottom is from 73 divergent windows in Denisova. Each volcano plot has enrichment on the horizontal axis and significance on the vertical axis which were calculated with reference to a shuffled null distribution ( $n = 500,000$ , Methods). Each point represents one ontology term. Only terms linked to the 3D divergent windows in each set were tested for enrichment or depletion. The most significant 10 terms are labeled if  $P < 0.05$  (dotted line). Similar to the Neanderthal (intersection) set, phenotypes related to the retina, hair, immune response, skeleton, cognition, and lung capacity are highlighted. Additional phenotypes at nominal significance include traits related to the heart, muscle, cancer, and bone density. Details about the process to link the 3D divergent windows to genes and phenotypes are in the Methods and Fig. S7. Details about the number of windows, variants, and phenotypes considered for each set are in Table S2.



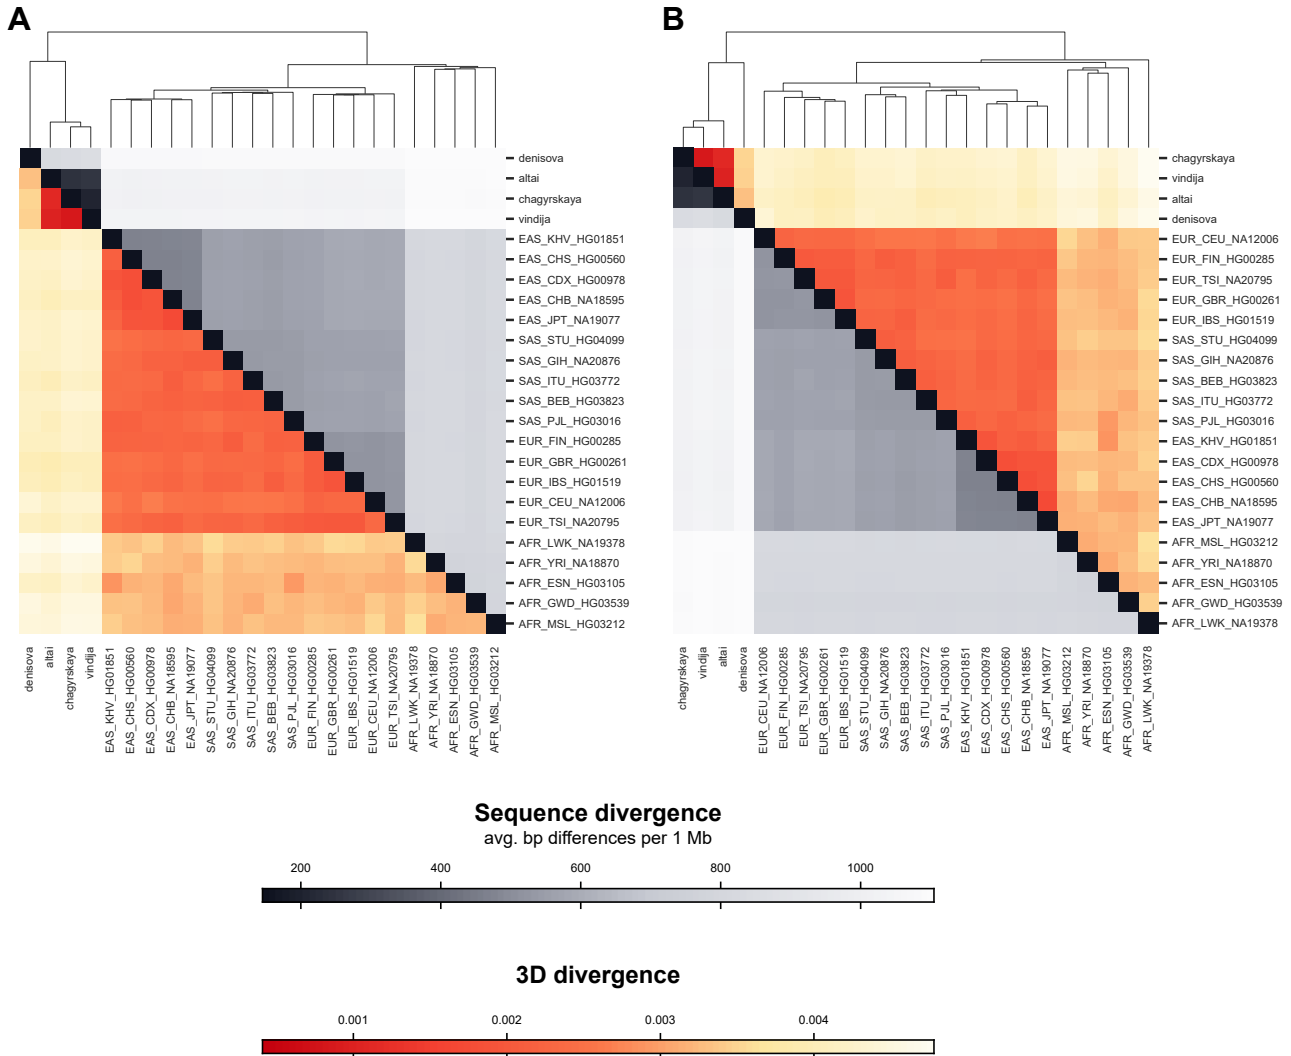

**Figure S9: Full pairwise heatmaps clustered by both sequence 3D divergence and sequence divergence.** We calculated the mean genome-wide 3D divergence for all pairs of AH and MH individuals (oranges) to compare with the genome-wide mean sequence divergence (grays). Fig. 4A displays these heatmaps when clustered by sequence divergence. Fig. 4A is reproduced in (A) with the full labels of all 1KGP individuals and their sub- and super-population information. (B) We also show the heatmap clustered by 3D genome divergence. Overall, global patterns of 3D genome divergence follow global patterns of sequence divergence. Lists of 1KGP individuals used and their abbreviation codes are defined in Table S1.

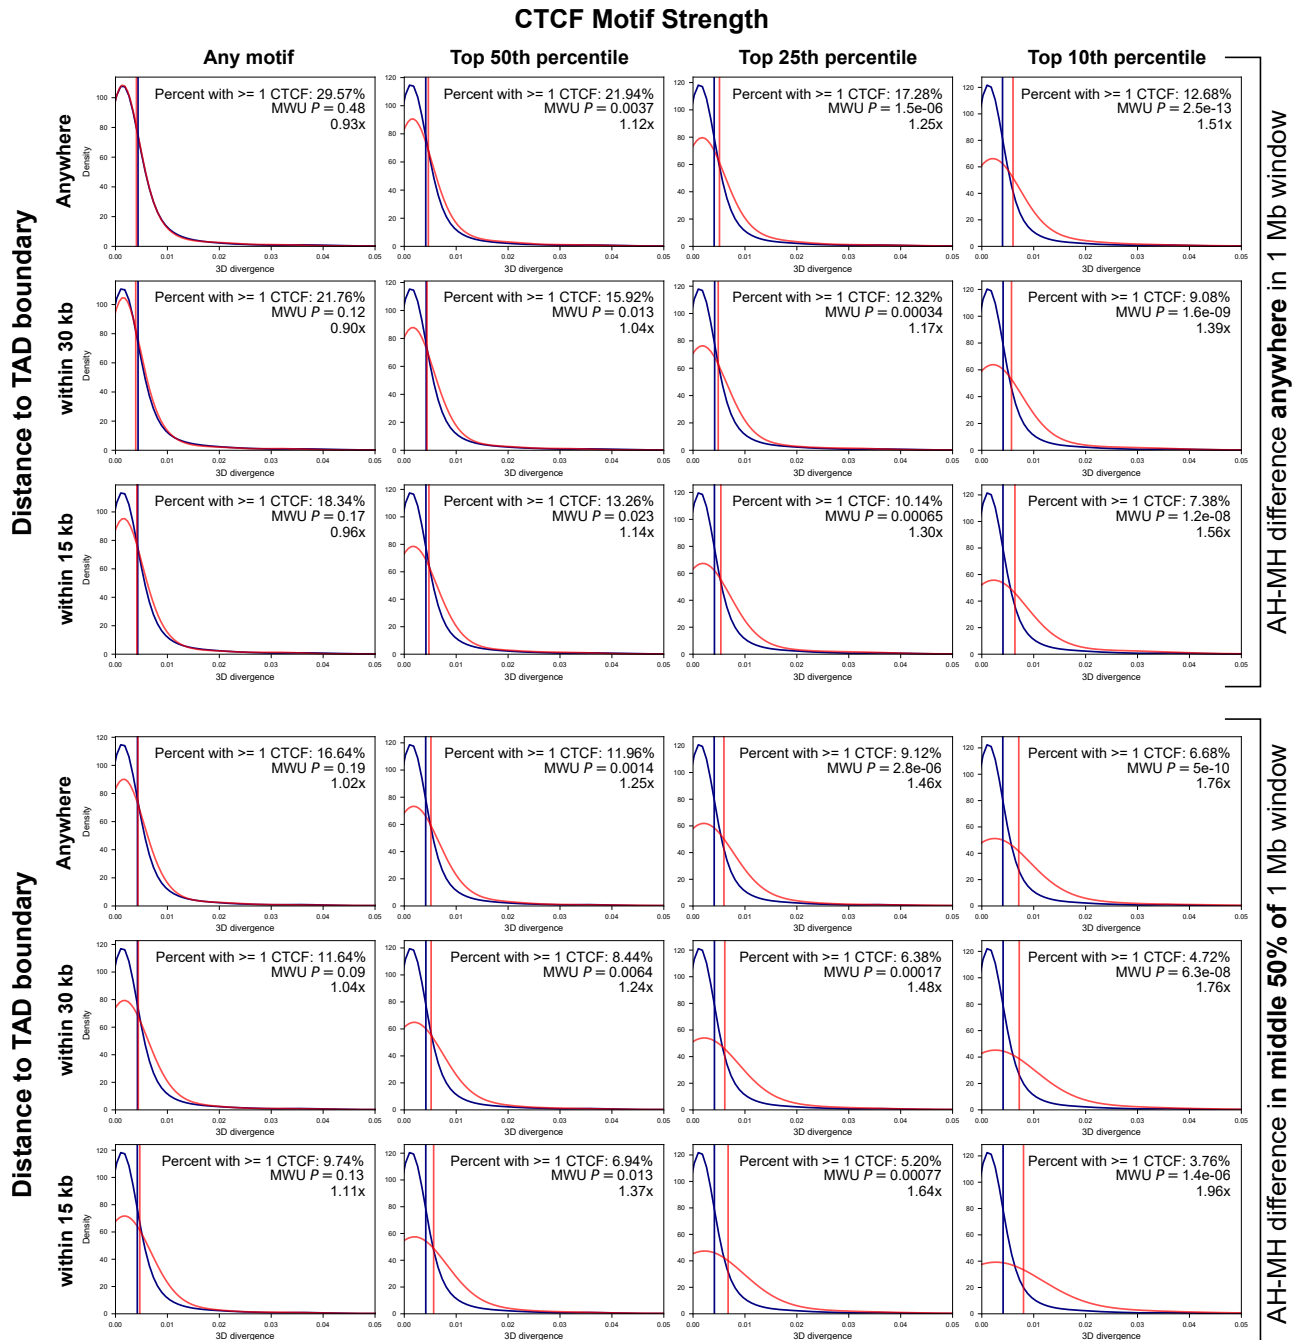

**Figure S10: 3D genome divergence depends on both the strength and context of the CTCF motif disrupted.** Based on the importance of CTCF-binding in maintaining 3D genome organization, we quantified the effects of AH-MH nucleotide differences overlapping CTCF binding motifs on 3D divergence. Given the complexity in the “grammar” of encoding 3D genome organization, we hypothesized that not all CTCF disruptions are equally likely to influence 3D divergence. Fig. 4B demonstrates this. But, here we replicate this with other thresholds and filters. We considered if each 1 Mb window ( $N = 4,999$ ) had a sequence difference between a Neanderthal (Vindija) and a MH (HG03105) genome that overlapped a CTCF site. We plotted the distribution of 3D divergence in a window by whether there was a “CTCF overlapping variant” (red) or not (blue). We further filtered windows by multiple annotations describing the context and strength of the CTCF site overlapped. First, we stratified windows by if the “CTCF overlapping variant” occurs within the middle half of the 1 Mb window (right vertical axis). Second, we stratified windows by the proximity of the “CTCF overlapping variant” to a TAD boundary (anywhere, within 30 kb, or within 15 kb) (left vertical axis). Finally, we stratified windows by the strength of the overlapped CTCF motif in percentiles (any, top 50%, 25%, or 10%) (horizontal axis). All three features describing context and strength are informative about the likelihood of 3D divergence. For example, when filtering for the strongest CTCF motifs overlapped by a variant, 3D divergence increases 1.96-fold compared to 1.11-fold if strength is ignored (bottom left vs. bottom right). When considering by proximity to TAD boundaries, 3D divergence always increases when a “CTCF overlapping variant” is closer to a TAD boundary (4<sup>th</sup> row vs. 6<sup>th</sup> row). This illustrates that our approach has learned the complex sequence patterns underlying 3D genome folding that could not be determined by simply intersecting AH variants with all CTCF sites.

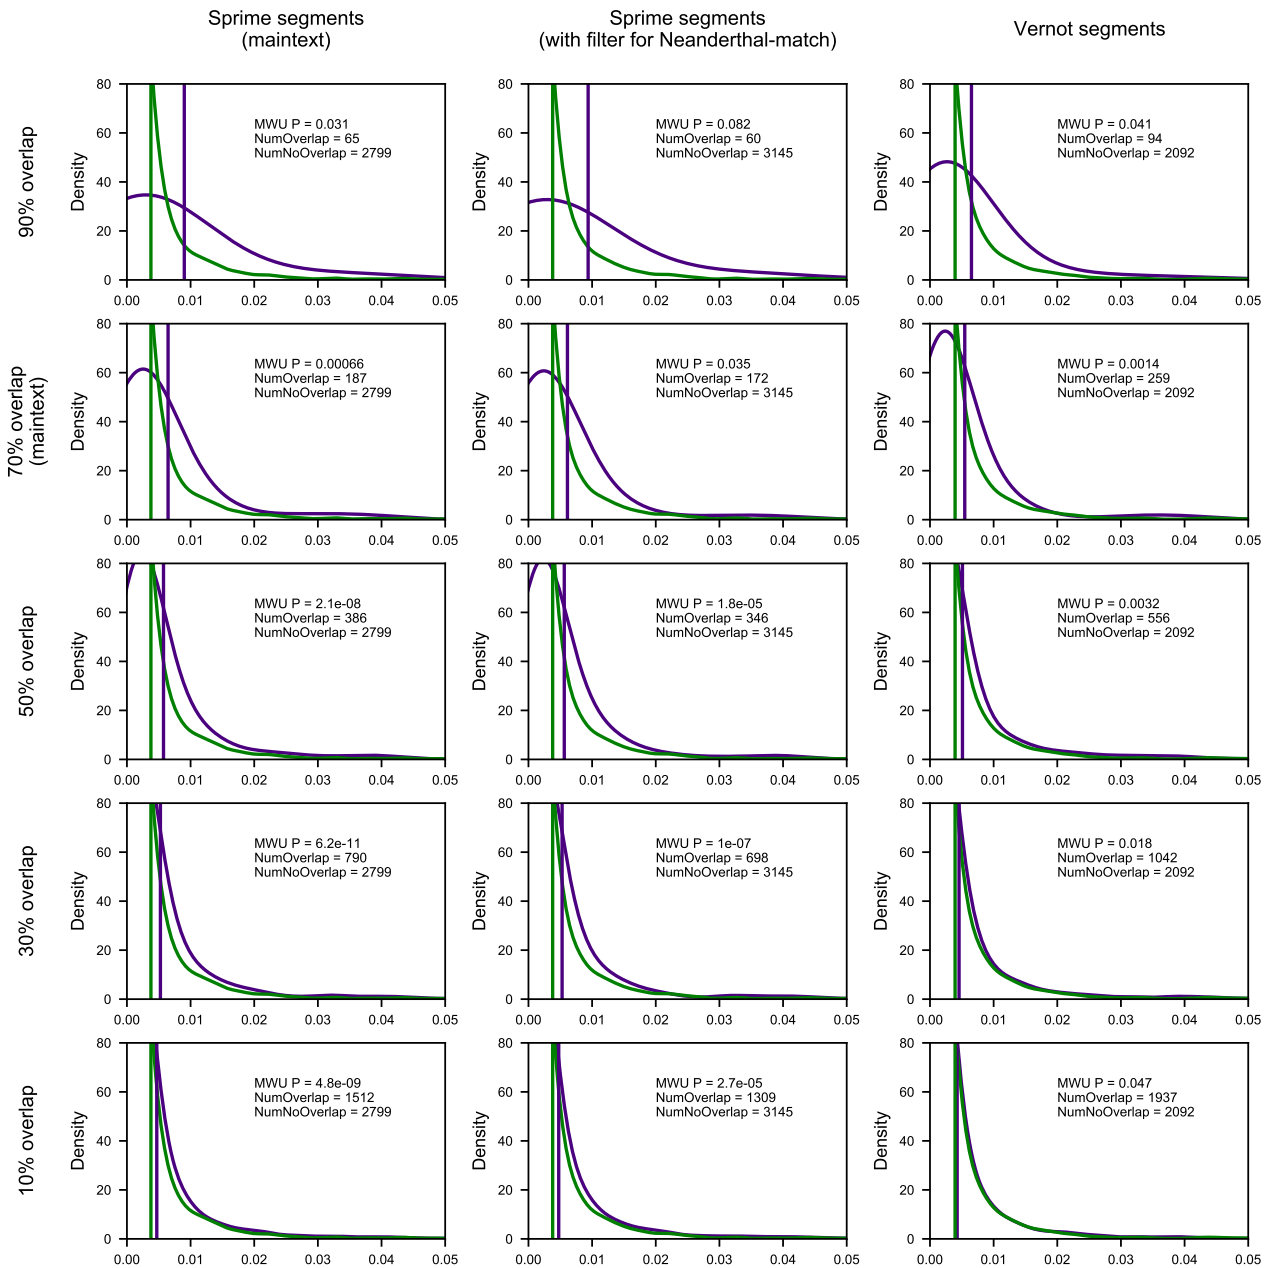

**Figure S11: Windows with evidence of AH introgression are more 3D variable in MHs even when using different definitions of introgression.**

Genomic windows with high levels of introgression across present-day non-African populations (purple distribution) are more 3D-variable in modern Africans (horizontal axis) than windows without evidence of introgression (green distribution). In the main text, we considered introgression defined by segments from Browning et al. [93] (first column) covering at least 70% of bases in a 1 Mb window (second row). This identifies 187 autosomal 1 Mb windows with introgression and 2,799 without (same figure as Fig. 5A). Here, we show that this trend is consistent even when using different sets of introgressed haplotypes (columns) and thresholds for overlap (rows). Sprime segments are from Browning et al. [93]. Sprime segments with Neanderthal-matching filter are a subset of the Browning et al. [93] introgressed segments that have 30 putatively introgressed variants that could be compared to the Altai Neanderthal genome and had a match rate of at least 30% to the Altai Neanderthal allele. S\* Vernot segments are from Vernot et al. [15]. Vertical lines represent the distribution means. *P*-values are from a two-tailed Mann-Whitney U test.

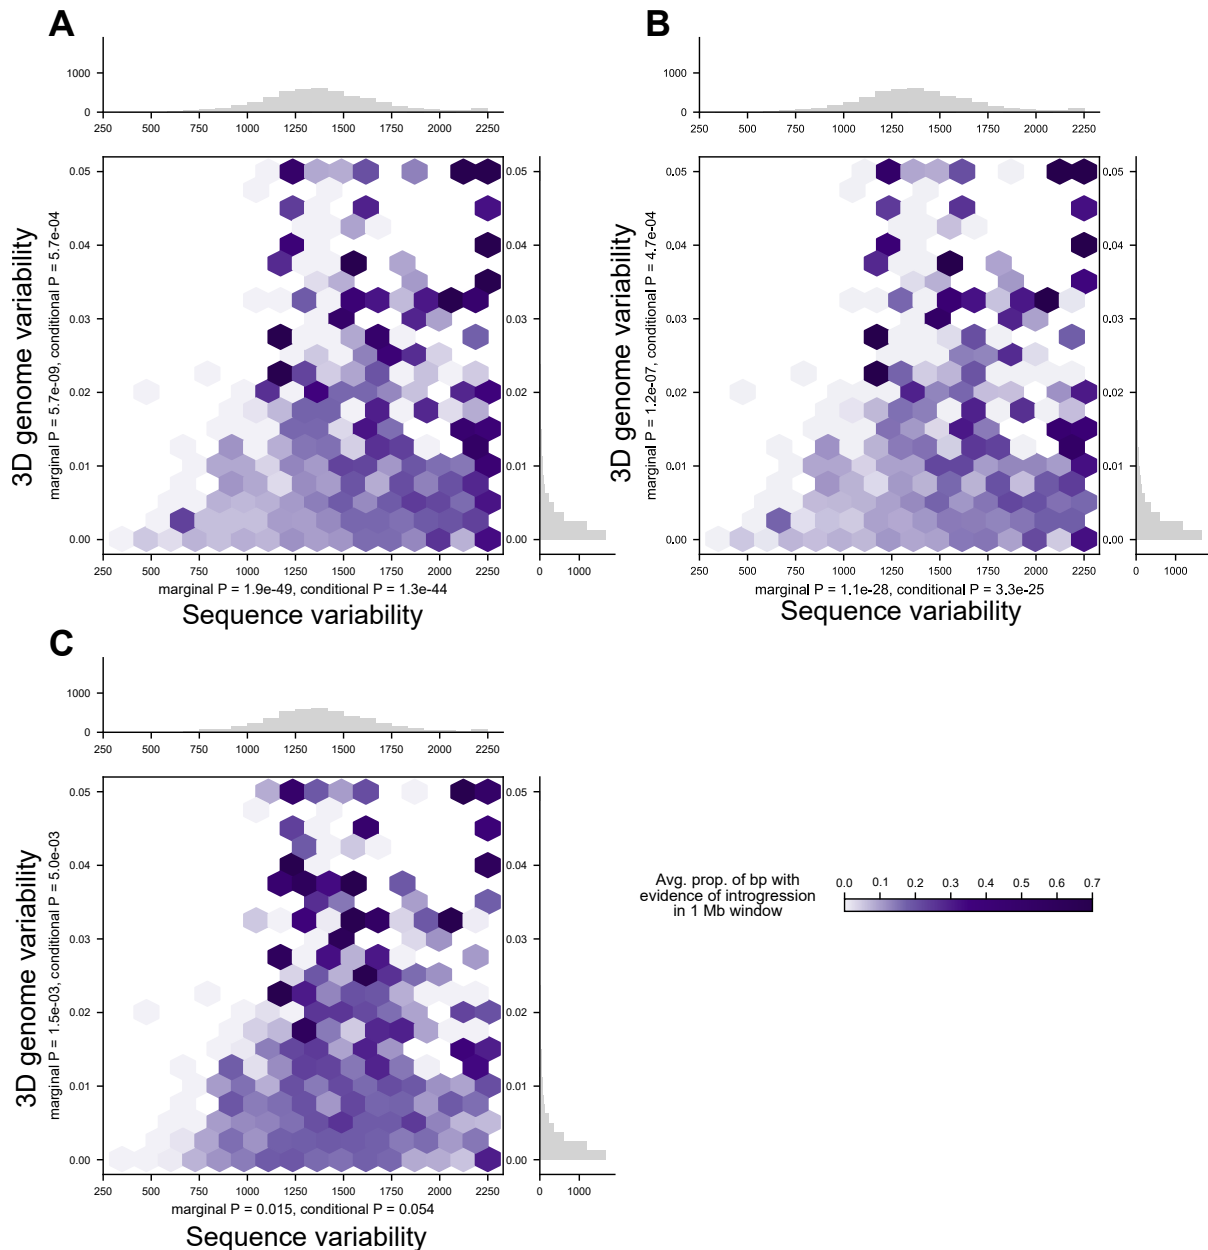

**Figure S12: 3D variable windows in MH have more evidence of AH introgression even when using different definitions of introgression.** For three different sets of introgressed haplotypes (A-C), we plot the relationship between sequence variability (horizontal axis) and 3D genome variability (vertical axis) with amount of AH ancestry in a window (purples). Darker purple indicates a higher proportion of introgression in a 1 Mb genomic window. 3D genome variability is defined as the average modern-African pairwise 3D genome diversity. Sequence variability is defined as the average pairwise nucleotide differences per modern-African in a 1 Mb window. *P*-values correspond to the significance of sequence variability or 3D genome variability to predict amount of introgression in a 1 Mb window. 3D genome variability is predictive of the amount of introgression both independently and when conditioned on sequence variability for all three sets of introgression. For, A,B, and C, respectively, introgressed haplotypes are from Sprime segments, Sprime segments with a Neanderthal-sequence match filter, and S\* segments. A is shown in the maintext in Fig. 5B. Sprime segments are from Browning et al. [93]. Sprime segments with Neanderthal-matching filter are a subset of the Browning et al. [93] introgressed segments that have 30 putatively introgressed variants that could be compared to the Altai Neanderthal genome and had a match rate of at least 30% to the Altai Neanderthal allele. Vernot segments are from Vernot et al. [15].

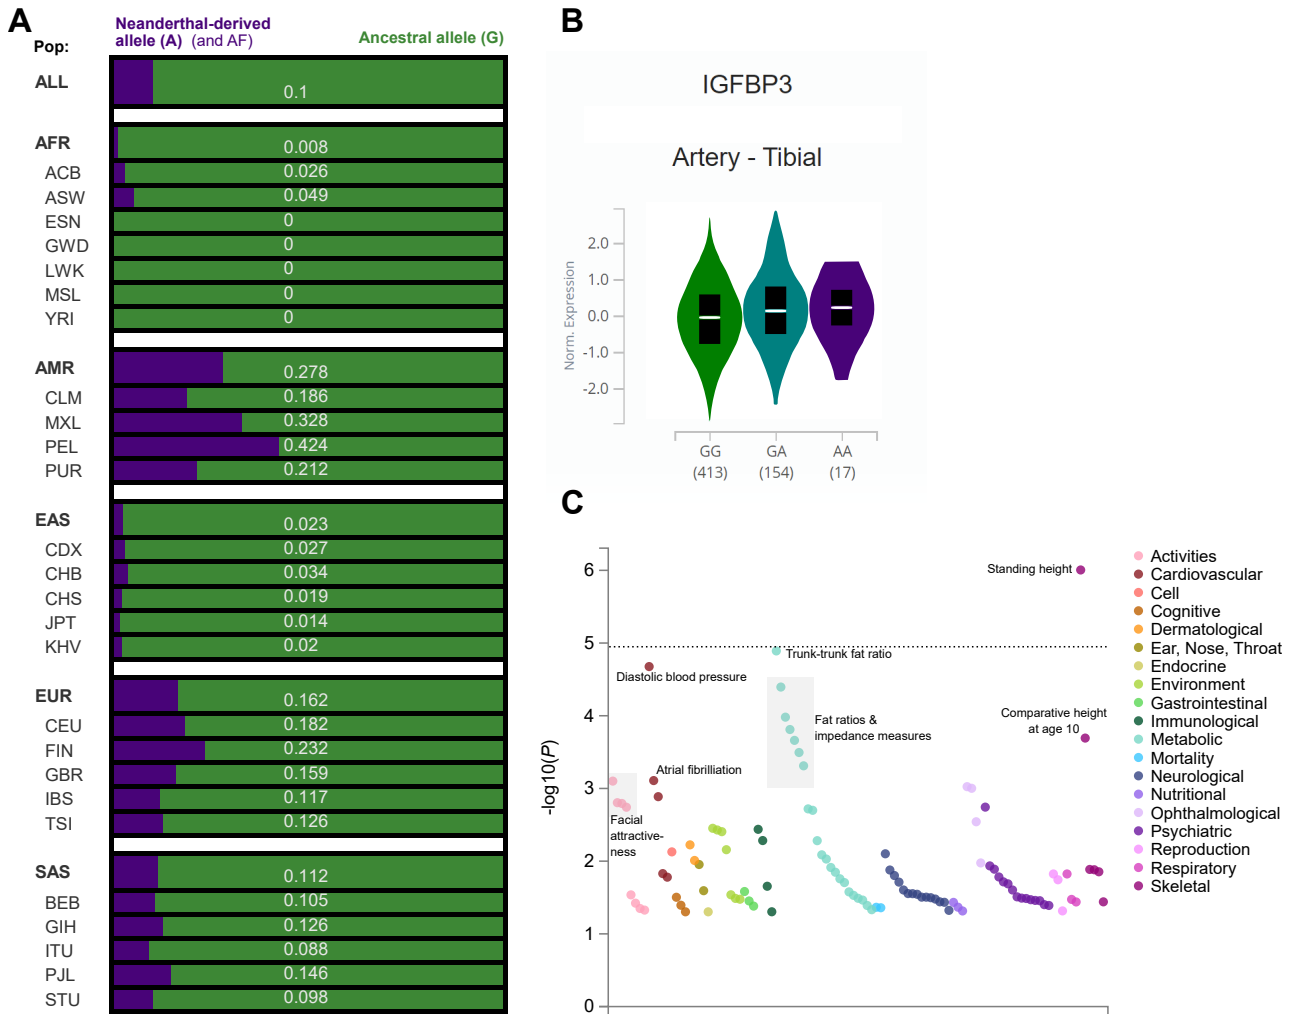

**Figure S13: rs12536129 is a high-frequency introgressed allele with regulatory and phenotypic associations.** In Fig. 6A–B, we describe an AH-MH 3D divergent window that was introgressed into some modern Eurasians. *In silico* mutagenesis of this window revealed a G to A change at chr7:46,169,621 (rs12536129) associated with the largest change in 3D genome organization. (A) Across human populations, this introgressed allele remains at high-frequency today, especially in Peru (28% AMR, 2% EAS, 16% EUR, 11% SAS, 0% non-admixed sub-Saharan AFR). Purple bars represent the frequency of the introgressed Neanderthal-derived allele. (B) This introgressed allele is also an eQTL in GTEx for the physically linked gene *IGFBP3*, Insulin-like growth factor-binding protein 3 ( $P = 0.00014$  in artery tissue) [42]. (C) In MHs, this variant is associated with traits including standing height ( $P = 9.9 \times 10^{-7}$ ), fat distribution (trunk fat ratio, impedance measures,  $P = 1.3 \times 10^{-5}$ ), and diastolic blood pressure ( $P = 2.1 \times 10^{-5}$ ). This figure was generated with the GWASAtlas from Watanabe et al. [102] and is sorted by domain and  $P$ -value. The dotted line represents a highly conservative Bonferroni corrected  $P$ -value ( $1.05 \times 10^{-5}$ ) for testing 4756 traits (including many correlated traits and GWASs in which the SNP was not tested).



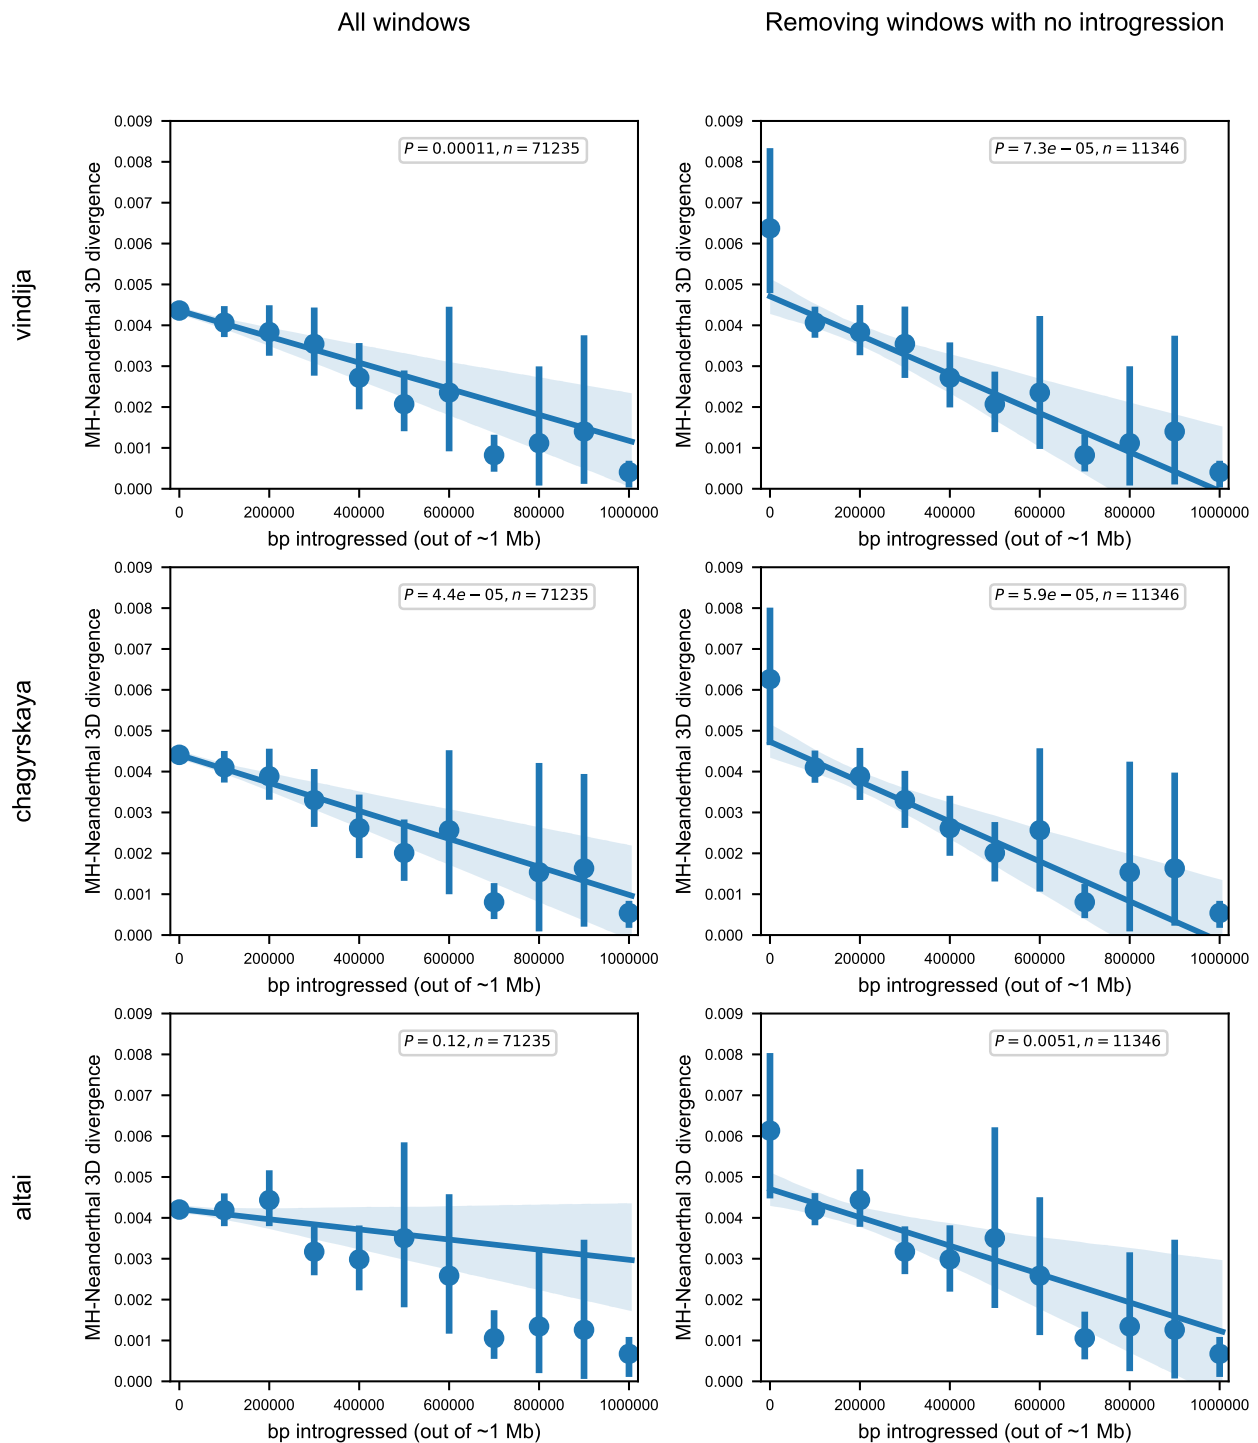

**Figure S14: Amount of introgression is negatively correlated with 3D divergence to all Neanderthal individuals.** The amount of introgression in a 1 Mb window (number of bp, horizontal axis) is significantly correlated with the similarity of an individual's 3D genome organization to a Neanderthal's genome organization (vertical axis). This is demonstrated across all three Neanderthal individuals: Vindija in the top panel (also shown in Fig. 6C), Chagyrskaya in the middle, and Altai at the bottom. We hypothesize the trend is weakest in Altai because it is less related to the introgressing Neanderthal population compared to the Vindija Neanderthal [2]. The left column considers all 4,749 autosomal 1 Mb windows for 15 Eurasians (total  $n = 71,235$ , 1KGP individuals in Table S1). In the right column, this trend also holds when you remove 1 Mb windows with no (0 bp) introgression in the 15 considered Eurasian individuals  $n = 11,346$ . The P-values are the significance of the correlation. The error bars signify 95% bootstrapped confidence intervals and the error band signifies the 95% bootstrapped confidence interval for the linear regression estimate.

18 **6.3 Supplementary Tables**

|                                                                 | Superpopulation | Subpopulation | ID       | Subpopulation Description                                         |
|-----------------------------------------------------------------|-----------------|---------------|----------|-------------------------------------------------------------------|
| Individuals in initial and Eurasian introgression analyses      | EAS             | CDX           | HG00978  | Chinese Dai in Xishuangbanna, China                               |
|                                                                 | EAS             | CHB           | NA18595  | Han Chinese in Beijing, China                                     |
|                                                                 | EAS             | CHS           | HG00560  | Han Chinese South                                                 |
|                                                                 | EAS             | JPT           | NA19077  | Japanese in Tokyo, Japan                                          |
|                                                                 | EAS             | KHV           | HG01851  | Kinh in Ho Chi Minh City, Vietnam                                 |
|                                                                 | EUR             | CEU           | NA12006  | Utah residents (CEPH) with Northern and Western European ancestry |
|                                                                 | EUR             | FIN           | HG00285  | Finnish in Finland                                                |
|                                                                 | EUR             | GBR           | HG00261  | British in England and Scotland                                   |
|                                                                 | EUR             | IBS           | HG01519  | Iberian populations in Spain                                      |
|                                                                 | EUR             | TSI           | NA20795  | Toscans in Italia                                                 |
|                                                                 | SAS             | BEB           | HG03823  | Bengali in Bangladesh                                             |
|                                                                 | SAS             | GIH           | NA20876  | Gujarati Indian in Houston, TX                                    |
|                                                                 | SAS             | ITU           | HG03772  | Indian Telugu in the UK                                           |
|                                                                 | SAS             | PJL           | HG03016  | Punjabi in Lahore, Pakistan                                       |
|                                                                 | SAS             | STU           | HG04099  | Sri Lankan Tamil in the UK                                        |
|                                                                 | AFR             | GWD           | HG03539  | Gambian in Western Division, The Gambia                           |
|                                                                 | AFR             | LWK           | NA19378  | Luhya in Webuye, Kenya                                            |
|                                                                 | AFR             | MSL           | HG03212  | Mende in Sierra Leone                                             |
|                                                                 | AFR             | YRI           | NA18870  | Yoruba in Ibadan, Nigeria                                         |
|                                                                 | AFR             | ESN           | HG03105* | Esan in Nigeria                                                   |
| Africans in AH-MH divergence and 3D genome variability analyses | AFR             | ESN           | HG03105  | Esan in Nigeria                                                   |
|                                                                 | AFR             | ESN           | HG03499  | Esan in Nigeria                                                   |
|                                                                 | AFR             | ESN           | HG03511  | Esan in Nigeria                                                   |
|                                                                 | AFR             | ESN           | HG03514  | Esan in Nigeria                                                   |
|                                                                 | AFR             | ESN           | HG02922  | Esan in Nigeria                                                   |
|                                                                 | AFR             | GWD           | HG03539  | Gambian in Western Division, The Gambia                           |
|                                                                 | AFR             | GWD           | HG03025  | Gambian in Western Division, The Gambia                           |
|                                                                 | AFR             | GWD           | HG03028  | Gambian in Western Division, The Gambia                           |
|                                                                 | AFR             | GWD           | HG03040  | Gambian in Western Division, The Gambia                           |
|                                                                 | AFR             | GWD           | HG03046  | Gambian in Western Division, The Gambia                           |
|                                                                 | AFR             | LWK           | NA19378  | Luhya in Webuye, Kenya                                            |
|                                                                 | AFR             | LWK           | NA19017  | Luhya in Webuye, Kenya                                            |
|                                                                 | AFR             | LWK           | NA19434  | Luhya in Webuye, Kenya                                            |
|                                                                 | AFR             | LWK           | NA19445  | Luhya in Webuye, Kenya                                            |
|                                                                 | AFR             | LWK           | NA19019  | Luhya in Webuye, Kenya                                            |
|                                                                 | AFR             | MSL           | HG03212  | Mende in Sierra Leone                                             |
|                                                                 | AFR             | MSL           | HG03086  | Mende in Sierra Leone                                             |
|                                                                 | AFR             | MSL           | HG03085  | Mende in Sierra Leone                                             |
|                                                                 | AFR             | MSL           | HG03437  | Mende in Sierra Leone                                             |
|                                                                 | AFR             | MSL           | HG03378  | Mende in Sierra Leone                                             |

**Table S1: 1000 Genomes Project (1KGP) individual genomes used for 3D genome predictions.** The top set of individuals were used in the initial 3D genome survey (Figs. 2, 4A) and introgression analyses (Fig. 6). The bottom set of African individuals was used to more robustly call AH-MH 3D genome divergence windows (Fig. 3) and to calculate MH 3D genome variability (Fig. 5). For consistency, the genome of HG03105 was used for all examples.

|                                     | Number of 1 Mb 3D divergent windows (includes partially overlapped windows) | Number of unique 3D divergent windows (merging overlapping windows) | Number of “3D-modifying variants” observed in the 3D divergent windows | Number of “3D-modifying variants” that have evidence of introgression | Proportion of “3D-modifying variants” that have evidence of introgression | Number of gene-“3D-modifying variants” links* | Number of unique genes linked to 3D-modifying variants** | Number of unique HPO terms linked to “3D-modifying variants” (used in enrichment test)* | Number of unique GWAS terms linked to “3D-modifying variants” (used in enrichment test)* |
|-------------------------------------|-----------------------------------------------------------------------------|---------------------------------------------------------------------|------------------------------------------------------------------------|-----------------------------------------------------------------------|---------------------------------------------------------------------------|-----------------------------------------------|----------------------------------------------------------|-----------------------------------------------------------------------------------------|------------------------------------------------------------------------------------------|
| Vindija                             | 93                                                                          | 70                                                                  | 76                                                                     | 38                                                                    | 0.500                                                                     |                                               |                                                          |                                                                                         |                                                                                          |
| Chagyrskaya                         | 95                                                                          | 71                                                                  | 78                                                                     | 32                                                                    | 0.410                                                                     |                                               |                                                          |                                                                                         |                                                                                          |
| Altai                               | 82                                                                          | 67                                                                  | 73                                                                     | 33                                                                    | 0.452                                                                     |                                               |                                                          |                                                                                         |                                                                                          |
| Denisova                            | 105                                                                         | 73                                                                  | 83                                                                     | 9                                                                     | 0.108                                                                     | 130                                           | 129                                                      | 248                                                                                     | 318                                                                                      |
| All Neanderthals (intersection)     | 54                                                                          | 43                                                                  | 45                                                                     | 28                                                                    | 0.622                                                                     | 88                                            | 85                                                       | 271                                                                                     | 208                                                                                      |
| All Neanderthals (union)            | 144                                                                         | 110                                                                 | 121                                                                    | 43                                                                    | 0.355                                                                     | 224                                           | 206                                                      | 535                                                                                     | 435                                                                                      |
| All archaic hominins (intersection) | 10                                                                          | 7                                                                   | 8                                                                      | 6                                                                     | 0.750                                                                     |                                               |                                                          |                                                                                         |                                                                                          |
| All archaic hominins (union)        | 234                                                                         | 167                                                                 | 191                                                                    | 45                                                                    | 0.236                                                                     |                                               |                                                          |                                                                                         |                                                                                          |

**Table S2: Counts of 3D divergent windows and 3D-modifying variants.** The number of 3D divergent windows per different AH individuals (rows) are in the first two columns. The first column is the raw 1 Mb windows, while the second column counts overlapping windows as one merged window (these values are depicted in Fig. 3B). The number of 3D-modifying variants in each window is in column three. The number and fraction of these 3D-modifying variants that are introgressed are in columns four and five. To conduct the phenotype ontology enrichment analyses shown in Figs. 3D, S8, we linked the 3D-modifying variants to genes (column six and seven, see Methods). These genes were then linked to terms using Human Phenotype Ontology (HPO) (column eight) and the GWAS Catalog. These two sets of terms were then tested for enrichment. The phenotype ontology enrichment analysis parts (columns denoted with \*) were only calculated on certain sets of 3D-diverged windows.

See supplementary excel file for large tables.

**Table S3: AH-MH 3D divergent windows.** Coordinates (in hg19) for 167 AH-MH 3D divergent windows identified in Fig. 3A–B. Windows were identified at approximately 1 Mb resolution (Methods) and overlapping windows were merged. The “AH” column details for which AH(s) the 3D divergent window was identified (A: Altai, C: Chagyrskaya, D: Denisova, V: Vindija). If a window was identified in two different AHs but they were only partially overlapping, the specific coordinates are reported in the “AH” column. For example, at chr13:92798976-94371840, Altai and Chagyrskaya have a 3D divergent window identified at chr13:92798976-93847552, while Vindija has a slightly longer window at chr13:92798976-94371840. Table S5 reports the 3D-modifying variants identified in each window.

See supplementary excel file for large tables.

**Table S4: AH-MH 3D divergent windows with less strict thresholds.** In addition to the AH-MH divergent windows characterized in the maintext (Figs. 3A–B) and reported in Tables S2,S3, we report a set of AH-MH windows using less stringent criteria. Instead of requiring all 20 AH-MH comparisons to be more 3D divergent than all MH-MH comparisons, we required the average AH-MH comparison to be more 3D divergent than all MH-MH comparisons. We considered regions in the 75<sup>th</sup> percentile most diverged using either the mean squared error (MSE) or Spearman-based ( $1 - \rho$ ) measures. Otherwise, the procedure to identify AH-MH 3D divergent windows is the same as in the Methods. This identifies 252 windows. Although the windows were identified at approximately 1 Mb resolution (Methods), overlapping windows were merged. The “AH” column details for which AH(s) the 3D divergent window was identified (A: Altai, C: Chagyrskaya, D: Denisova, V: Vindija). If a window was identified in two different AHs but they were only partially overlapping, the specific coordinates are reported in the “AH” column. For example, at chr14:69206016-70778880, Altai and Vindija have a 3D divergent window identified at chr14:69206016-70778880, while Chagyrskaya has a slightly shorter window at chr14:69206016-70254592. Table S6 reports the 3D-modifying variants identified in each window.

See supplementary excel file for large tables.

**Table S5: 3D-modifying variants identified inside AH-MH 3D divergent windows.** Each 3D-modifying variant that was identified in an AH-MH 3D divergent window (Fig. 3A–B, Table S3) is reported and described. Columns one through four detail the position (in hg19) and alleles. Column five details for which AH(s) the variant and window was found (A: Altai, C: Chagyrskaya, D: Denisova, V: Vindija). It also provides the 3D divergence score. The format is “AH : *in silico* mutagenesis 3D divergence score : AH-MH 3D-divergent window”. For example, chr1:74305804 is a 3D-modifying variant identified in the 1 Mb window chr1:73924608-74973184 in Chagyrskaya, Altai, and Vindija with a 3D divergence of 0.0279 in *in silico* mutagenesis (Methods). Many 3D-modifying variants are identified in overlapping windows. For example, chr1:159131001 is a 3D-modifying variant identified in both chr1:158859264-159907840 and chr1:158334976-159383552 with 3D divergences of 0.0048 and 0.0049 from *in silico* mutagenesis, respectively. Column six provides the coordinates of the TAD in which the 3D-modifying variant is located and column seven provides the protein coding genes within that TAD. Column eight provides overlap with GTEX eQTL in the format “gene:P-value:tissue”. Column nine provides overlap with putatively adaptive high-frequency haplotypes from Chen et al. [94]. Column ten provides 1KGP phase 3 allele frequencies by super-population (note: “AFR” includes admixed individuals from the Caribbean and southwestern USA). If allele frequencies are not present, this variant was not introgressed. Column ten provides a CTCF motif match score for 3D-modifying variants that overlapped CTCF sites defined by Vierstra et al. [96]. For details about all the resources used for these annotations, see the Methods.

See supplementary excel file for large tables.

**Table S6: 3D-modifying variants identified in AH-MH divergent windows with less strict thresholds.** Each 3D-modifying variant that was identified in an AH-MH 3D divergent windows with less strict thresholds is reported. See Table S4 for a list of these windows and the criteria used to identify them. Columns one through four detail the position (in hg19) and alleles. Column five details for which AH(s) the variant and window was found (A: Altai, C: Chagyrskaya, D: Denisova, V: Vindija). It also provides the 3D divergence score and the measure (Spearman-based [spe] or mean squared error [mse]) used to identify the variant. The format is “AH : *in silico* mutagenesis 3D divergence score based on  $1 - \rho$  : *in silico* mutagenesis 3D divergence score based on MSE : AH-MH 3D-divergent window”. For example, chr1:74305804 is a 3D-modifying variant identified in the window chr1:73924608-74973184 in Chagyrskaya, Altai, and Vindija by the Spearman-based and MSE measures (with 3D divergence 0.0279 and 0.0015, respectively). This variant is also identified for the overlapping window chr1:73400320-74448896 in Chagyrskaya, Altai, and Vindija with the Spearman-based measure (0.0063, but not identified with the MSE).

|                                                          |                                         |  | Sequence variability |               | 3D genome variability |               |
|----------------------------------------------------------|-----------------------------------------|--|----------------------|---------------|-----------------------|---------------|
|                                                          |                                         |  | marginal P           | conditional P | marginal P            | conditional P |
| Browning introgressed haplotypes                         | introgression SHARED across populations |  | 1.9E-49              | 1.3E-44       | 5.7E-09               | 0.00057       |
|                                                          | introgression UNIQUE to one population  |  | 0.039                | 0.019         | 0.14                  | 0.066         |
| Browning introgressed haplotypes with Neanderthal filter | introgression SHARED across populations |  | 1.1E-28              | 3.3E-25       | 1.2E-07               | 0.00047       |
|                                                          | introgression UNIQUE to one population  |  | 0.067                | 0.014         | 0.00054               | 0.00013       |
| Vernot introgressed haplotype                            | introgression SHARED across populations |  | 0.015                | 0.054         | 0.0015                | 0.005         |
|                                                          | introgression UNIQUE to one population  |  | 0.48                 | 0.79          | 0.0094                | 0.012         |

**Table S7: Both 3D genome and sequence variability are more important in predicting introgression shared across super-populations than introgression unique to a single super-population.** When considering the relationships between 3D genome variability, sequence variability, and amount of introgression (Supplemental Text, Figs. 5, S12), we consider introgression that was shared across 1KGP super-populations (EAS, EUR, SAS) (white rows) compared to introgression unique to only one super-population (gray rows). We find that 3D genome variability (last two columns) is more strongly predictive of introgression shared among all three super-populations. The analysis was replicated on three sets of introgressed haplotypes. Browning introgressed haplotypes are Sprime segments Browning haplotypes with Neanderthal-matching filter are a subset of the Browning et al. [93] introgressed segments that have 30 putatively introgressed variants that could be compared to the Altai Neanderthal genome and had a match rate of at least 30% to the Altai Neanderthal allele. Vernot haplotypes are S\* segments from Vernot et al. [15].



|                                                          |                                                            | Sequence variability |               | 3D genome variability |               |
|----------------------------------------------------------|------------------------------------------------------------|----------------------|---------------|-----------------------|---------------|
|                                                          |                                                            | marginal P           | conditional P | marginal P            | conditional P |
| Browning introgressed haplotypes                         | ALL windows (N = 4749)                                     | 1.90E-49             | 1.30E-44      | 5.70E-09              | 0.00057       |
|                                                          | ONLY windows with any evidence of introgression (N = 1950) | 0.0004               | 0.0072        | 1.90E-06              | 3.00E-05      |
| Browning introgressed haplotypes with Neanderthal filter | ALL windows (N = 4749)                                     | 1.10E-28             | 3.30E-25      | 1.20E-07              | 0.00047       |
|                                                          | ONLY windows with any evidence of introgression (N = 1604) | 0.042                | 0.19          | 0.0001                | 0.00038       |
| Vernot introgressed haplotype                            | ALL windows (N = 4749)                                     | 1.50E-02             | 5.40E-02      | 0.0015                | 0.005         |
|                                                          | ONLY windows with any evidence of introgression (N = 2657) | 3.40E-05             | 8.40E-07      | 0.00068               | 1.60E-05      |

**Table S8: Compared to sequence variability, 3D variability is a relatively more informative predictor of amount of introgression when considering windows of the genome with any introgression.** When considering the relationships between 3D genome variability, sequence variability, and amount of introgression (Supplemental Text, Figs. 5, S12), we consider a subset of windows with any evidence of introgression (gray rows) compared to all windows (white rows). 3D variability is relatively more informative about the amount of introgression when only considering windows of the genome with any introgressed sequence present (last column). The analysis was replicated on three sets of introgressed haplotypes. Browning introgressed haplotypes are Sprime segments Browning haplotypes with Neanderthal-matching filter are a subset of the Browning et al. [93] introgressed segments that have 30 putatively introgressed variants that could be compared to the Altai Neanderthal genome and had a match rate of at least 30% to the Altai Neanderthal allele. Vernot haplotypes are S\* segments from Vernot et al. [15].
